# Supplementary material for: A dearomatization–rearomatization strategy for construction of 4H-quinolizin-4-ones via C–H bond functionalization of pyridines
Source: Royal Society of Chemistry journal article supplement (doi:10.1039/d3qo01990j), 2024-01-01
Supplement: d3qo01990j1.pdf [file d3qo01990j1.pdf]

## Supporting Information

### Dearomatization-Rearomatization Strategy for Construction of 4*H*-Quinolizin-4-ones via C-H Bond Functionalization of Pyridines

Dong Qiu,<sup>1,2</sup> and Yijin Su\*<sup>1</sup>

<sup>1</sup> *State Key Laboratory for Oxo Synthesis and Selective Oxidation, Lanzhou Institute of Chemical Physics (LICP), Chinese Academy of Sciences, Lanzhou 730000 (China)*

*E-mail: suyj@licp.cas.cn*

<sup>2</sup> *University of Chinese Academy of Sciences, Beijing 100049 (China)*

## Table of Contents

|                                                        |    |
|--------------------------------------------------------|----|
| 1. General Procedures and Bromide Effect.....          | 3  |
| 2. Synthesis of Pyridinium Salts and Spectra Data..... | 4  |
| 1a:.....                                               | 4  |
| 1b:.....                                               | 5  |
| 1c:.....                                               | 6  |
| 1d:.....                                               | 8  |
| 1f:.....                                               | 9  |
| 1g:.....                                               | 10 |
| 1h:.....                                               | 12 |
| 1i:.....                                               | 13 |
| 1j:.....                                               | 14 |
| 1k:.....                                               | 16 |
| 3. Synthesis of Products and Spectra Data.....         | 18 |
| 3aa:.....                                              | 18 |
| 3ba:.....                                              | 19 |
| 3ca:.....                                              | 20 |
| 3da:.....                                              | 22 |
| 3ea:.....                                              | 23 |
| 3fa:.....                                              | 24 |
| 3ga:.....                                              | 26 |
| 3ha:.....                                              | 27 |
| 3ia:.....                                              | 29 |
| 3ja:.....                                              | 30 |
| 3ka:.....                                              | 32 |
| 3ab:.....                                              | 33 |
| 3ac:.....                                              | 35 |
| 3ad:.....                                              | 36 |
| 3ae:.....                                              | 37 |
| 3af:.....                                              | 39 |
| 3ag:.....                                              | 40 |
| 3ah:.....                                              | 41 |
| 3ai:.....                                              | 43 |
| 3aj:.....                                              | 44 |
| 3ak:.....                                              | 45 |
| 3al:.....                                              | 47 |
| 3am:.....                                              | 48 |
| 4. Three-Component Reaction and Mechanism Study .....  | 51 |
| Scheme 4:.....                                         | 51 |
| Scheme 5:.....                                         | 51 |
| Scheme 6:.....                                         | 54 |
| Scheme 7:.....                                         | 57 |
| 5. X-ray Information for 3aa.....                      | 59 |
| 6. Reference .....                                     | 61 |

## 1. General Procedures and Bromide Effect

All the commercial available reagents and solvents were used as received. NMR spectra were obtained with Avance TM III 400MHz instruments, the chemical shifts were quoted on the  $\delta$ -scale in ppm. Multiplicities are reported as follows: singlet (s), doublet (d), triplet(t), doublet of doublets (dd), doublet of doublet of doublets (ddd), doublet of triplets (dt), doublet of quartets (dq), triplet of doublets (td), quartet (q), quartet of doublets (qd), and multiplet (m). Coupling constants (J) are reported in Hz. High resolution mass spectra (HRMS) were measured at a Bruker micrOTOF-QII instruments.

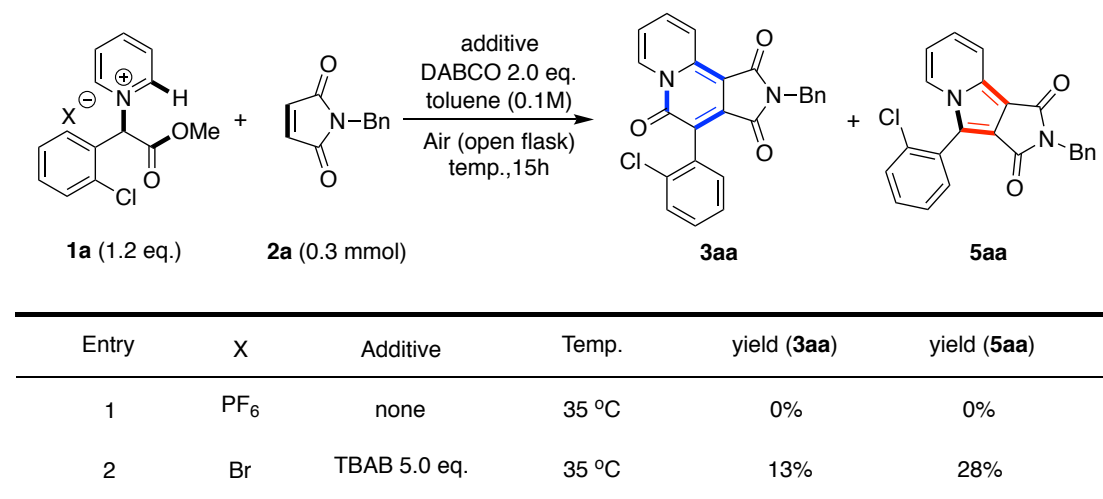

**Scheme S1.** Bromide Effect at 35 °C in toluene. <sup>[a], [b]</sup> [a] Reaction conditions: 1a (0.36 mmol), 2 (0.30 mmol), DABCO (0.60 mmol) in toluene (3.0 mL) under open-flask condition at 35 °C for 15h; [b] Yields determined by <sup>1</sup>H NMR spectroscopy using 1,3,5-trimethoxybenzene as internal standard.

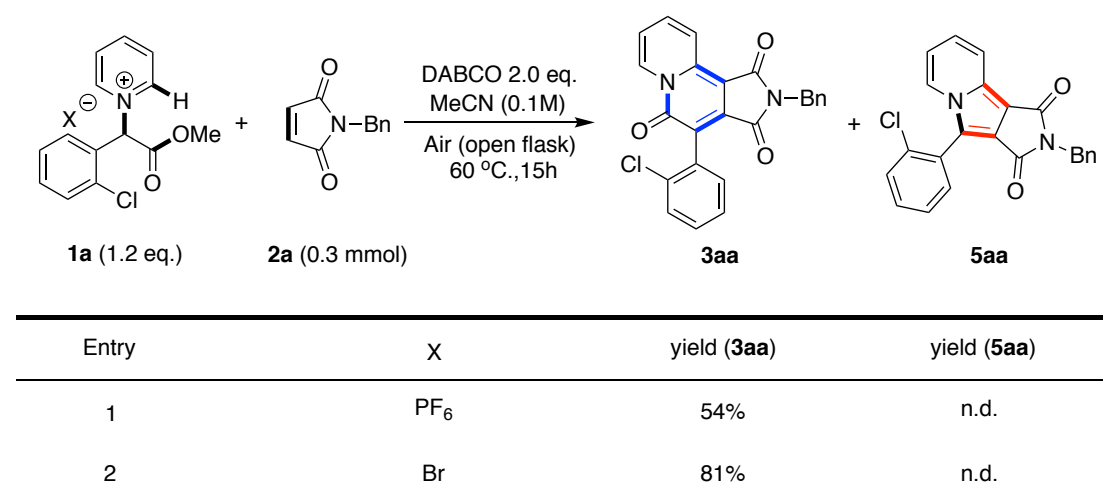

**Scheme S2.** Bromide Effect at 60 °C in MeCN. <sup>[a], [b]</sup> [a] Reaction conditions: 1a (0.36 mmol), 2 (0.30 mmol), DABCO (0.60 mmol) in MeCN (3.0 mL) under open-flask condition at 60 °C for 15h; [b] Yields determined by <sup>1</sup>H NMR spectroscopy using 1,3,5-trimethoxybenzene as internal standard.

## 2. Synthesis of Pyridinium Salts and Spectra Data

The starting materials of pyridinium salts are listed below. **1e** were prepared following reported procedures<sup>[1]</sup>.

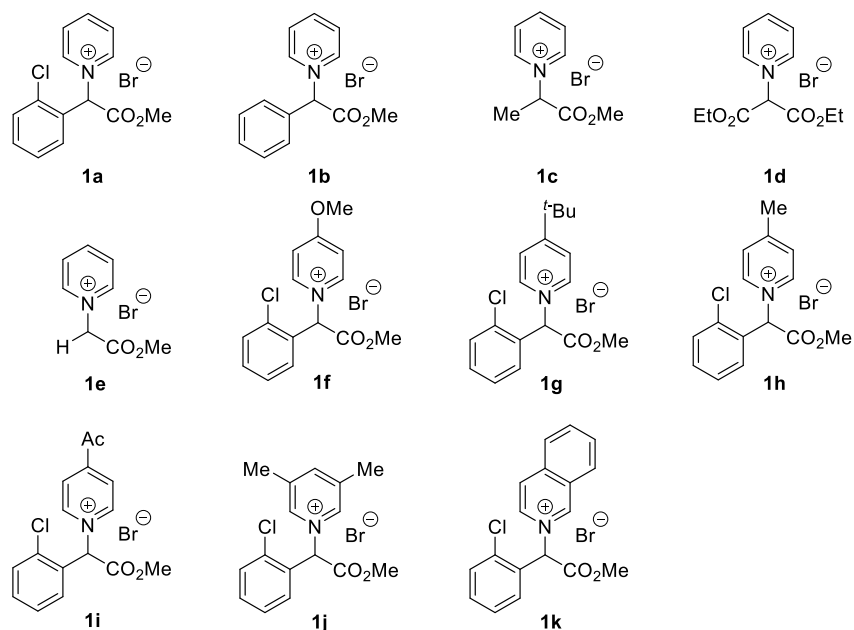

**1a:**

**1-(1-(2-chlorophenyl)-2-methoxy-2-oxoethyl)pyridinium bromide**

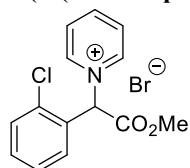

Synthesis procedure for **1a**: pyridine (5.5mmol) and ethyl methyl 2-bromo-2-(2-chlorophenyl)acetate (5mmol) were added in 3mL of ethyl acetate and stirred at room temperature for 6 hours. Then the resulting precipitate was filtered and washed with ethyl acetate to afford **1a**, as white solid (1.18g, yield=69%).

<sup>1</sup>H NMR (400 MHz, DMSO-*d*<sub>6</sub>) δ 9.10 (d, *J* = 6.0 Hz, 2H), 8.76 (t, *J* = 7.8 Hz, 1H), 8.25 (t, *J* = 7.1 Hz, 2H), 7.80 – 7.72 (m, 1H), 7.71 – 7.55 (m, 3H), 7.45 (s, 1H), 3.90 (s, 3H).

<sup>13</sup>C NMR (101 MHz, DMSO-*d*<sub>6</sub>) δ 166.7, 148.0, 145.2, 134.5, 133.1, 132.3, 130.8, 128.7, 128.7, 128.5, 71.8, 54.3.

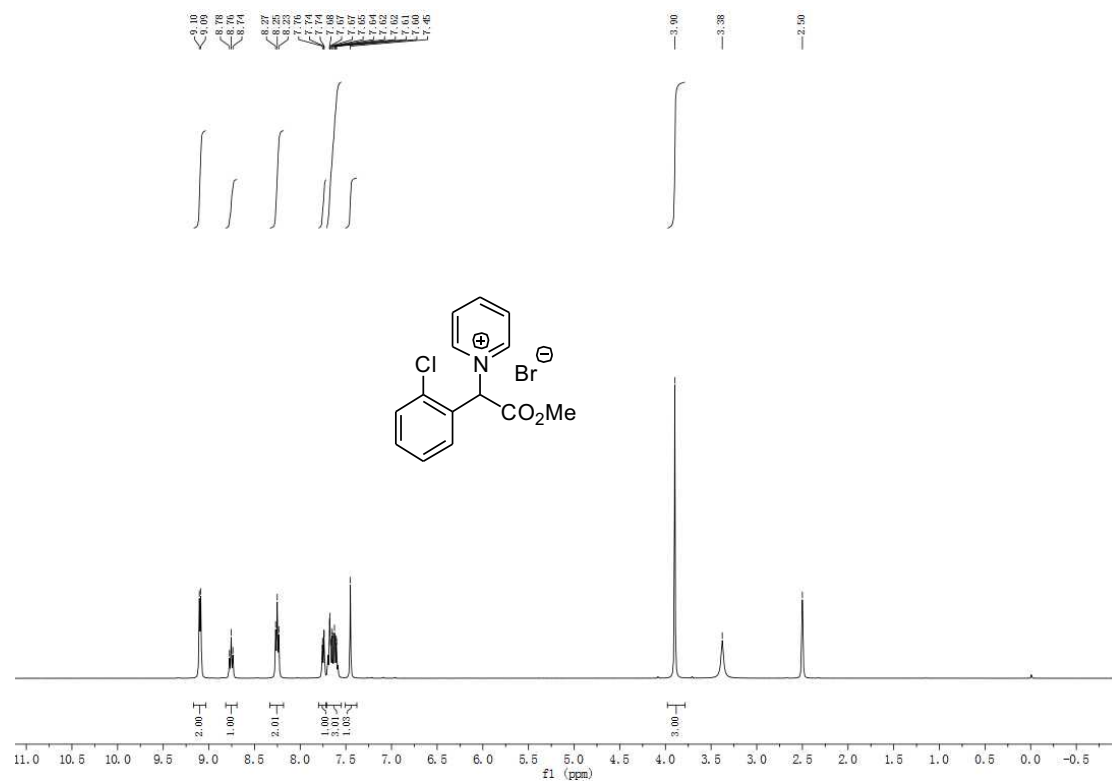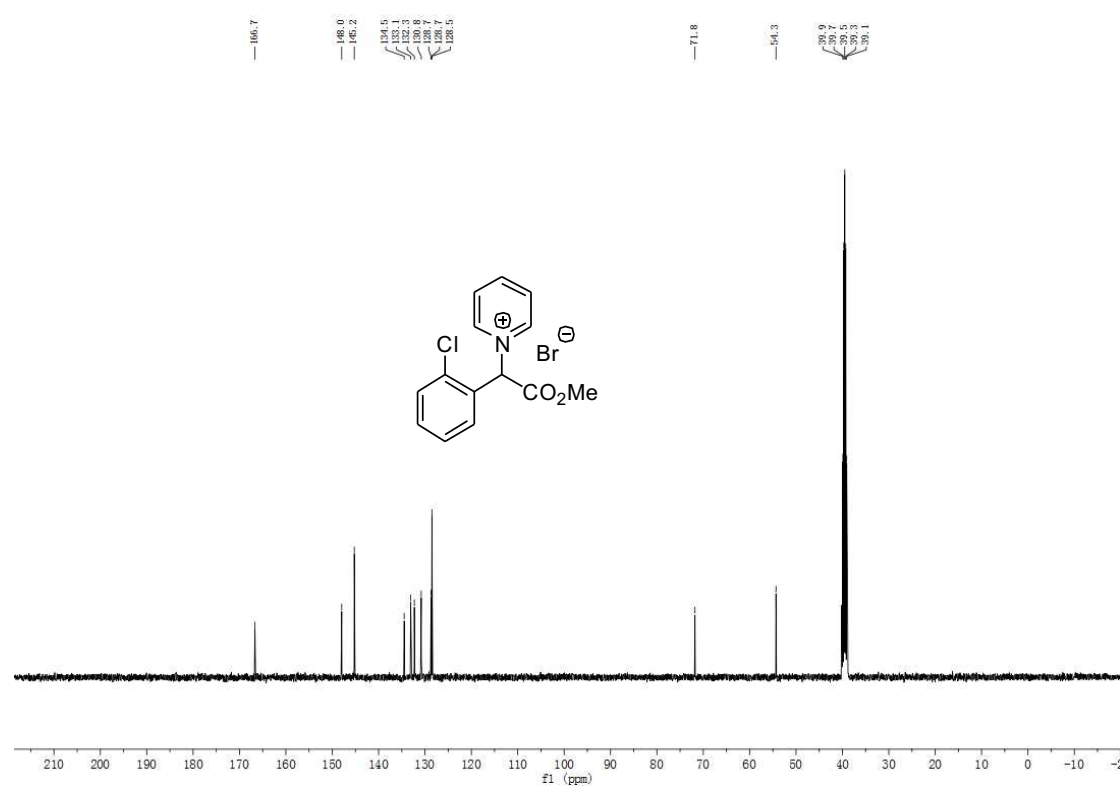

**1b:**  
**1-(2-methoxy-2-oxo-1-phenylethyl)pyridin-1-ium bromide**

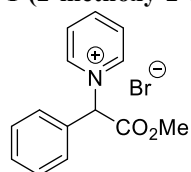

Synthesis procedure for **1b**: pyridine (10mmol) and methyl 2-bromo-2-phenylacetate (8mmol) were added in 4mL of ethyl acetate and stirred at room temperature for 8 hours. Then the resulting precipitate was filtered and washed with ethyl acetate to afford **1b**, as white solid (1.575g, yield=64%).

$^1\text{H}$  NMR (400 MHz, Deuterium Oxide)  $\delta$  9.05 – 8.86 (m, 2H), 8.67 (t,  $J = 7.8$  Hz, 1H), 8.14 (t,  $J = 7.1$  Hz, 2H), 7.70 – 7.54 (m, 5H), 7.12 (s, 1H), 3.97 (s, 3H).

$^{13}\text{C}$  NMR (101 MHz, Deuterium Oxide)  $\delta$  168.4, 147.5, 144.6, 131.4, 130.2, 129.7, 128.3, 74.9, 54.6.

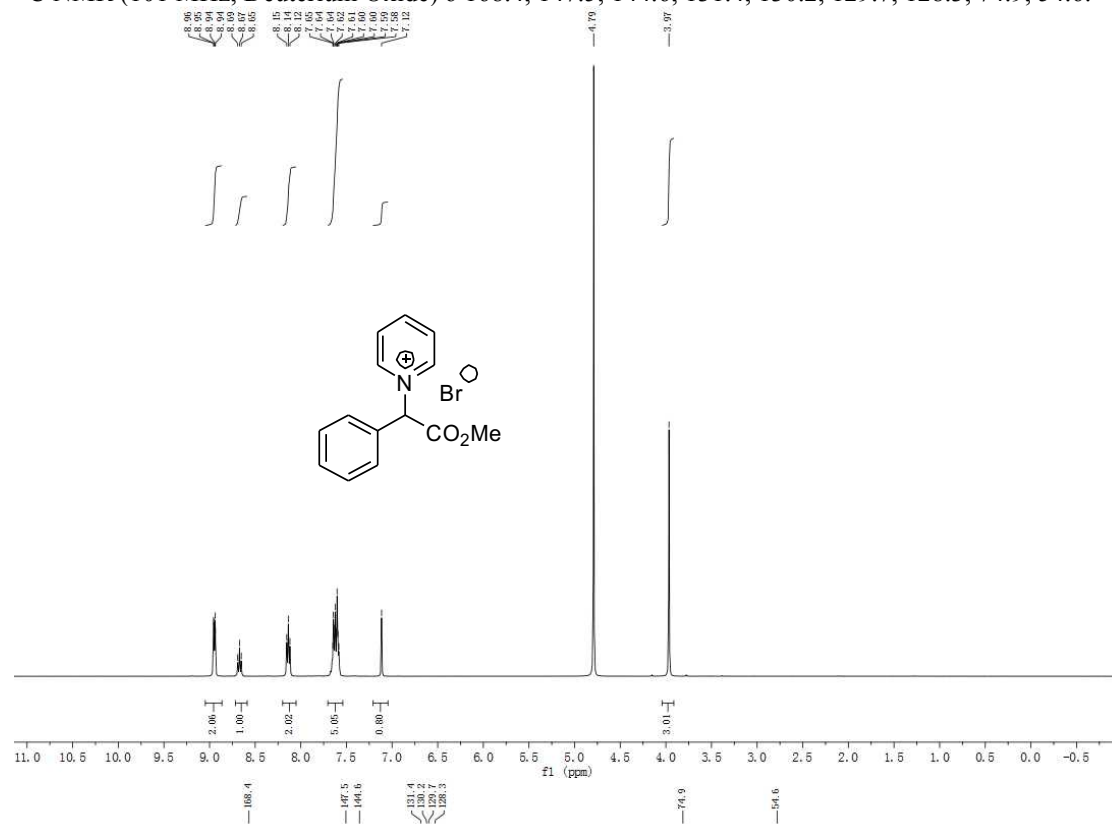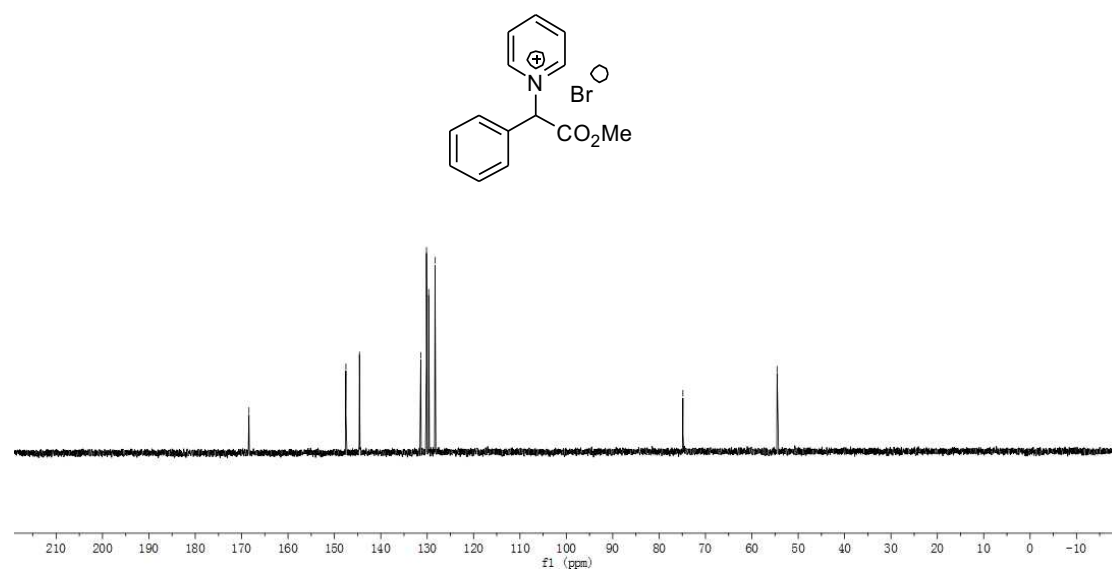

**1c:**  
1-(1-methoxy-1-oxopropan-2-yl)pyridin-1-ium bromide

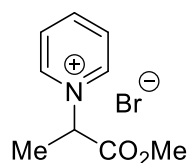

Synthesis procedure for **1c**: pyridine (10mmol) and methyl 2-bromopropanoate (8mmol) were added in 4mL of 1,4 dioxane and stirred at 35°C for 8 hours. Then the resulting precipitate was filtered and washed with ethyl acetate to afford **1c**, as colorless solid (1.18g, yield=60%).

$^1\text{H}$  NMR (400 MHz,  $\text{DMSO-}d_6$ )  $\delta$  9.15 (d,  $J = 6.1$  Hz, 2H), 8.71 (t,  $J = 7.8$  Hz, 1H), 8.24 (t,  $J = 7.1$  Hz, 2H), 5.94 (q,  $J = 7.3$  Hz, 1H), 3.77 (s, 3H), 1.93 (d,  $J = 7.3$  Hz, 3H).

$^{13}\text{C}$  NMR (101 MHz,  $\text{DMSO-}d_6$ )  $\delta$  168.6, 147.0, 144.9, 127.9, 67.3, 53.4, 17.3.

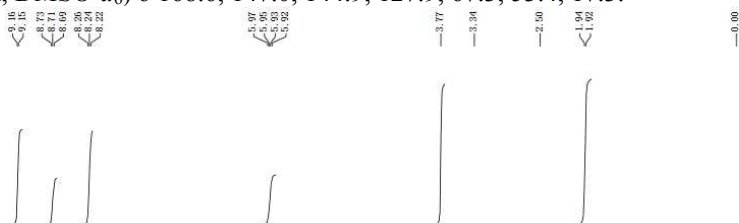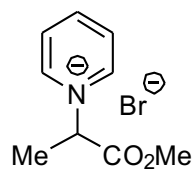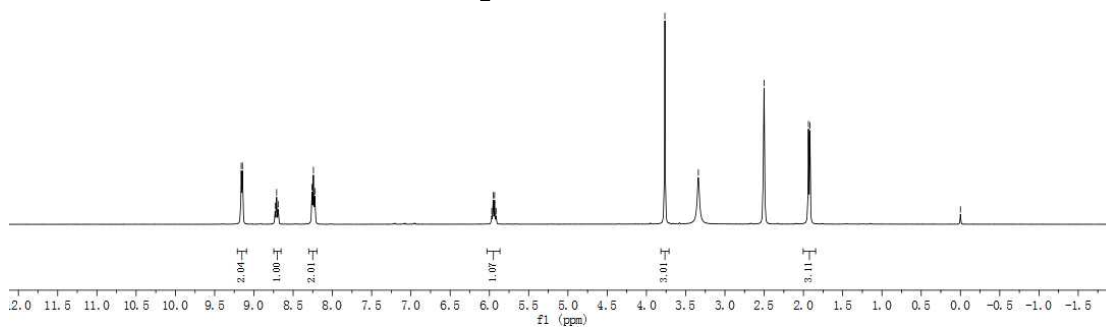

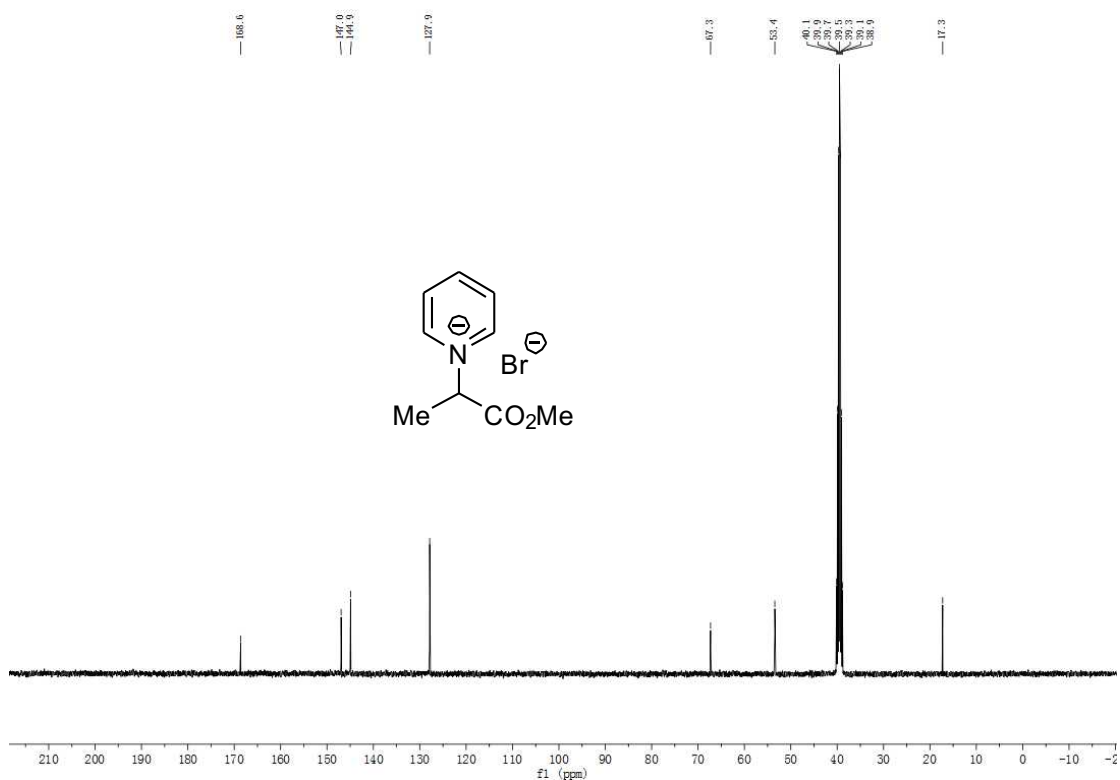

**1d:**  
**1-(1,3-diethoxy-1,3-dioxopropan-2-yl)pyridin-1-ium bromide**

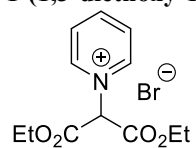

Synthesis procedure for **1d**: pyridine (12mmol) and diethyl 2-bromomalonate (10mmol) were added in 5mL of ethyl acetate and stirred at room temperature for 8 hours. Then the resulting precipitate was filtered and washed with ethyl acetate to afford **1d**, as light orange solid (2.39g, yield=75%).

<sup>1</sup>H NMR (400 MHz, DMSO-*d*<sub>6</sub>) δ 9.15 (d, *J* = 6.1 Hz, 2H), 8.79 (t, *J* = 7.8 Hz, 1H), 8.27 (t, *J* = 7.1 Hz, 2H), 7.00 (s, 1H), 4.45 – 4.15 (m, 4H), 1.27 (t, *J* = 7.1 Hz, 6H).

<sup>13</sup>C NMR (101 MHz, DMSO-*d*<sub>6</sub>) δ 162.3, 148.1, 147.0, 127.3, 72.0, 63.7, 13.6.



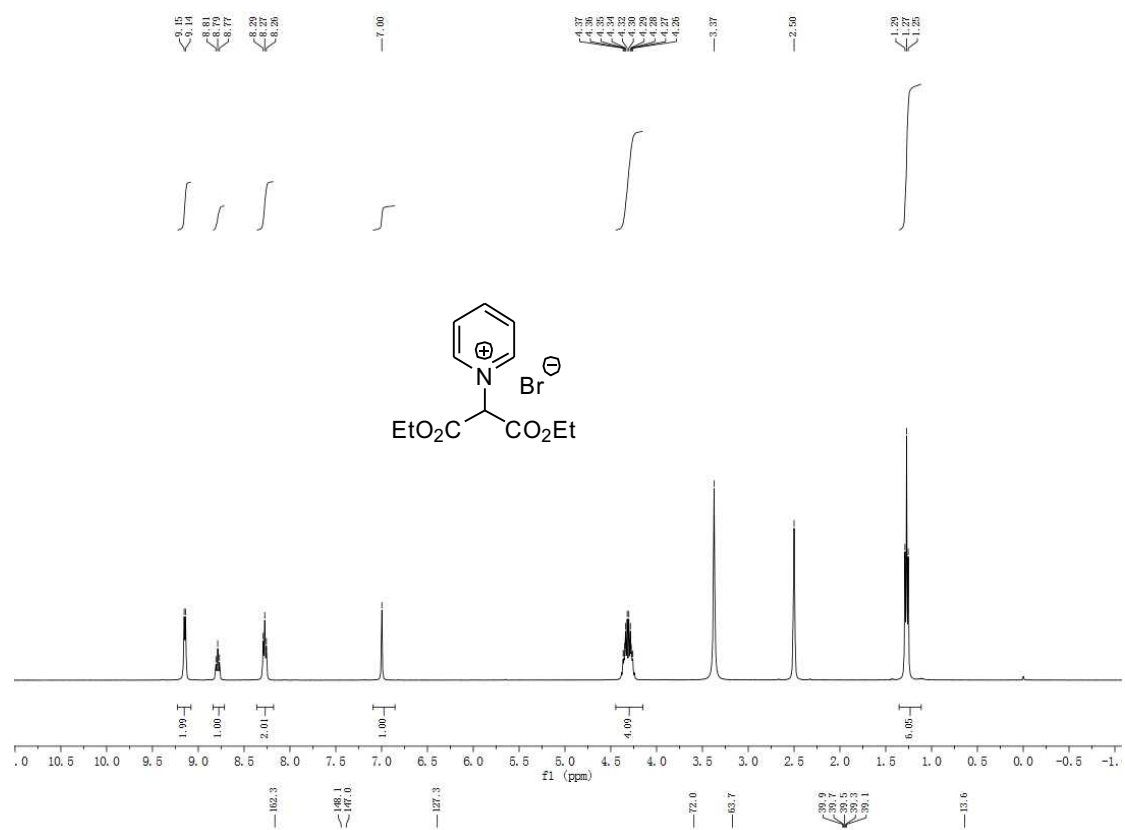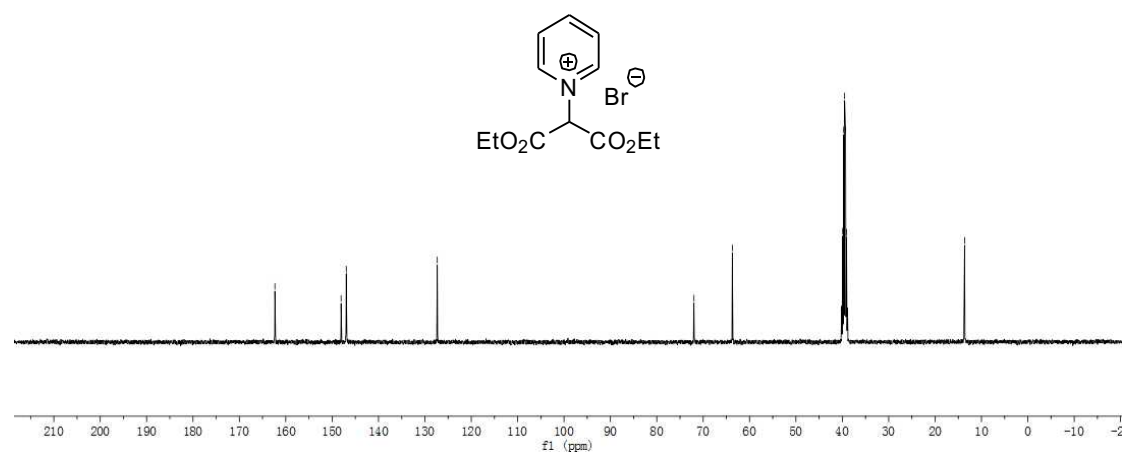

**1f:**  
**1-(1-(2-chlorophenyl)-2-methoxy-2-oxoethyl)-4-methoxypyridin-1-ium bromide**

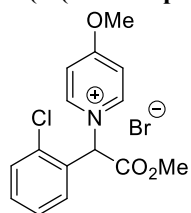

Synthesis procedure for **1f**: 4-methoxypyridine (8mmol) and methyl 2-bromo-2-(2-chlorophenyl)acetate (5mmol) were added in 4mL of ethyl acetate and stirred at room temperature for 10 hours. Then the resulting precipitate was filtered and washed with ethyl acetate to afford **1f**, as colorless solid (1.373g, yield=74%).

$^1\text{H}$  NMR (400 MHz,  $\text{DMSO-}d_6$ )  $\delta$  8.83 (d,  $J = 7.5$  Hz, 2H), 7.70 – 7.58 (m, 6H), 7.23 (s, 1H), 4.13 (s, 3H), 3.88 (s, 3H).

$^{13}\text{C}$  NMR (101 MHz,  $\text{DMSO-}d_6$ )  $\delta$  171.9, 167.1, 146.2, 134.3, 132.8, 131.9, 130.7, 129.2, 128.6, 113.7, 69.81, 58.4, 54.1.

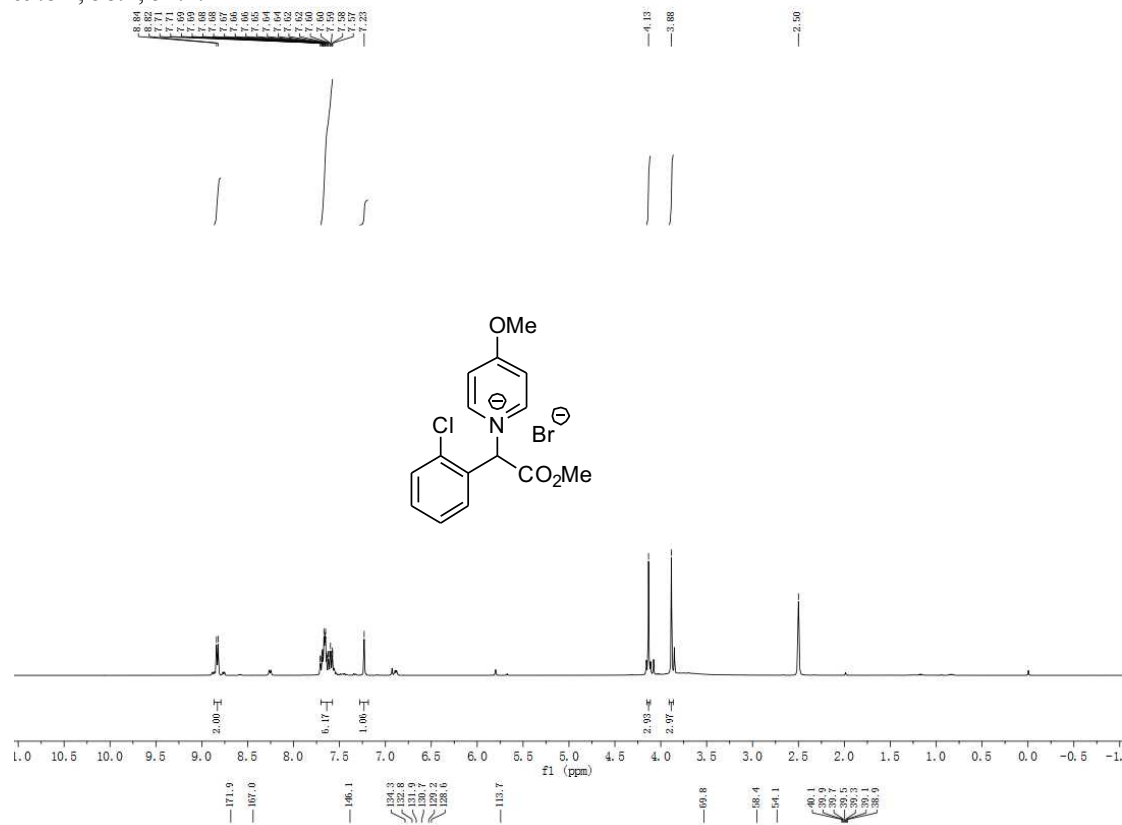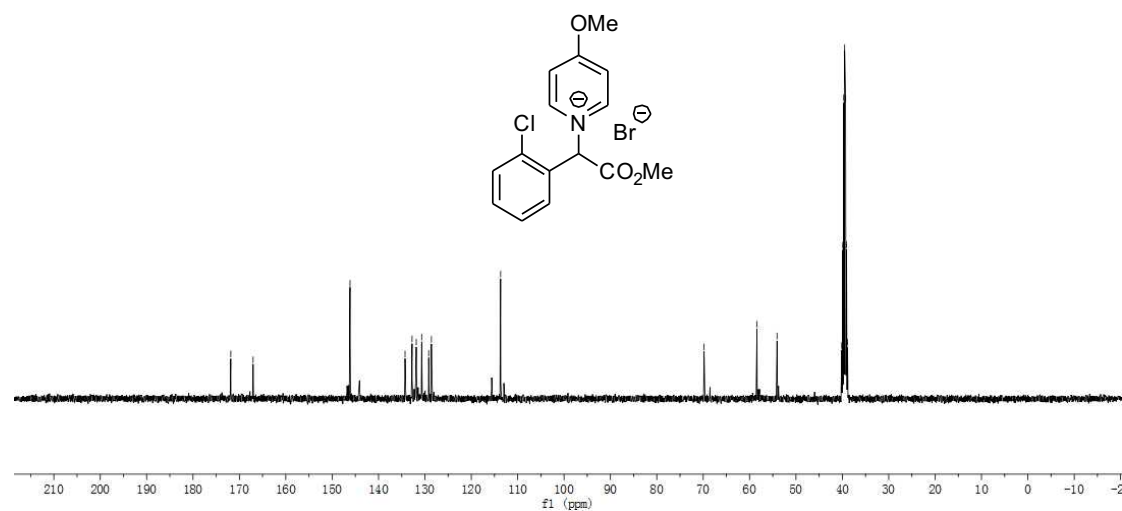

**1g**:  
4-(tert-butyl)-1-(1-(2-chlorophenyl)-2-methoxy-2-oxoethyl)pyridin-1-ium bromide

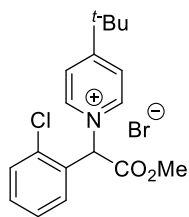

Synthesis procedure for **1g**: 4-(*tert*-butyl)pyridine (8mmol) and methyl 2-bromo-2-(2-chlorophenyl)acetate (5mmol) were added in 3mL of ethyl acetate and stirred at room temperature for 8 hours. Then the resulting precipitate was filtered and washed with ethyl acetate to afford **1g**, as white solid (1.546g, yield=78%).

$^1\text{H}$  NMR (400 MHz,  $\text{DMSO-}d_6$ )  $\delta$  9.02 (d,  $J = 7.0$  Hz, 2H), 8.28 (d,  $J = 7.0$  Hz, 2H), 7.79 (dd,  $J = 7.4$ , 1.9 Hz, 1H), 7.71 – 7.55 (m, 3H), 7.49 (s, 1H), 3.88 (s, 3H), 1.36 (s, 9H).

$^{13}\text{C}$  NMR (101 MHz,  $\text{DMSO-}d_6$ )  $\delta$  172.3, 166.8, 144.4, 134.4, 133.0, 132.3, 130.8, 128.9, 128.7, 125.4, 70.8, 54.3, 36.6, 29.4.

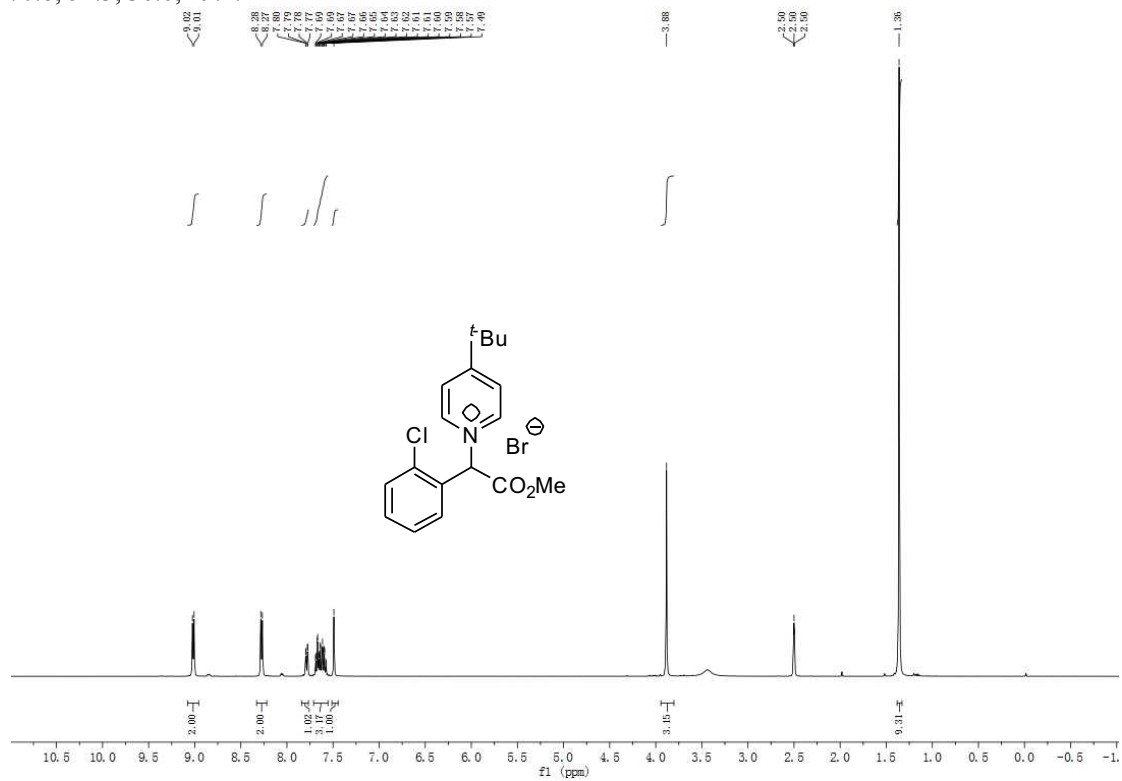

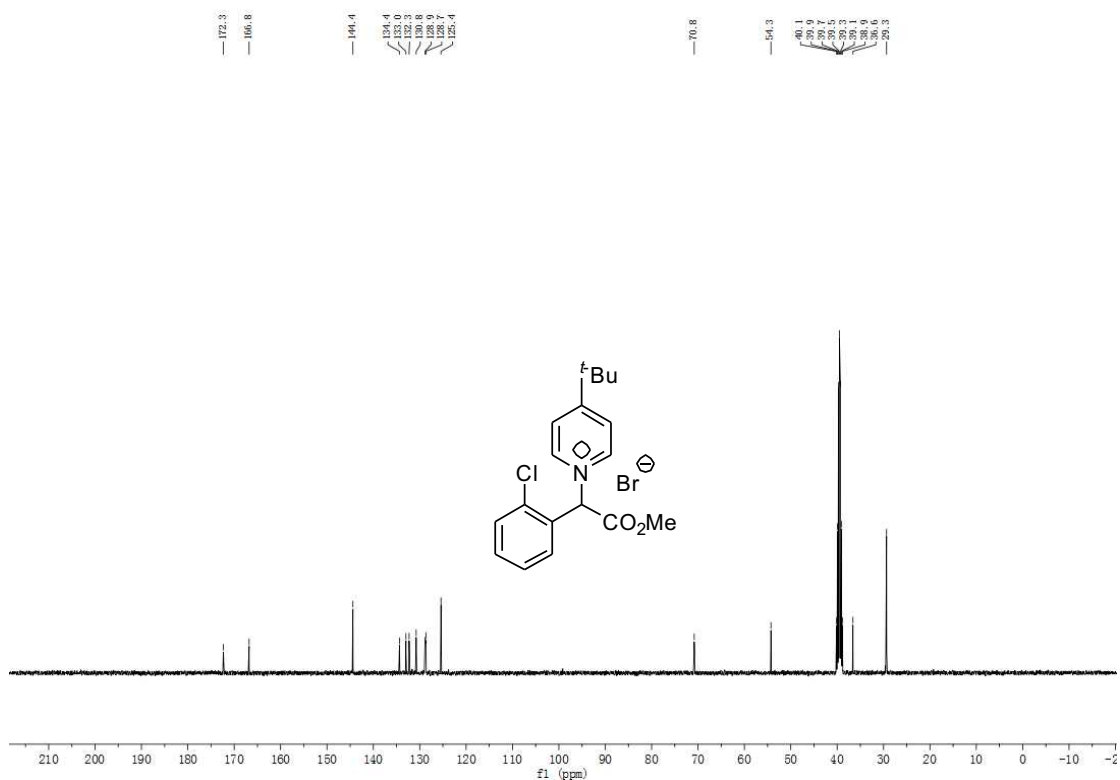

**1h:**

**1-(1-(2-chlorophenyl)-2-methoxy-2-oxoethyl)-4-methylpyridin-1-ium bromide**

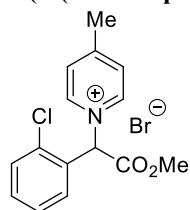

Synthesis procedure for **1h**: 4-methylpyridine (10mmol) and methyl 2-bromo-2-(2-chlorophenyl) acetate (8mmol) were added in 4mL of ethyl acetate and stirred at room temperature for 10 hours. Then the resulting precipitate was filtered and washed with ethyl acetate to afford **1h**, as light pink solid (2.801g, yield=99%).

$^1\text{H}$  NMR (400 MHz, Deuterium Oxide)  $\delta$  8.73 (d,  $J = 6.3$  Hz, 2H), 7.95 (d,  $J = 6.3$  Hz, 2H), 7.76 – 7.56 (m, 4H), 7.24 (s, 1H), 3.99 (s, 3H), 2.71 (s, 3H).

$^{13}\text{C}$  NMR (101 MHz, Deuterium Oxide)  $\delta$  168.2, 162.8, 143.6, 135.2, 133.1, 131.3, 131.1, 128.7, 128.5, 128.1, 54.7, 21.7.

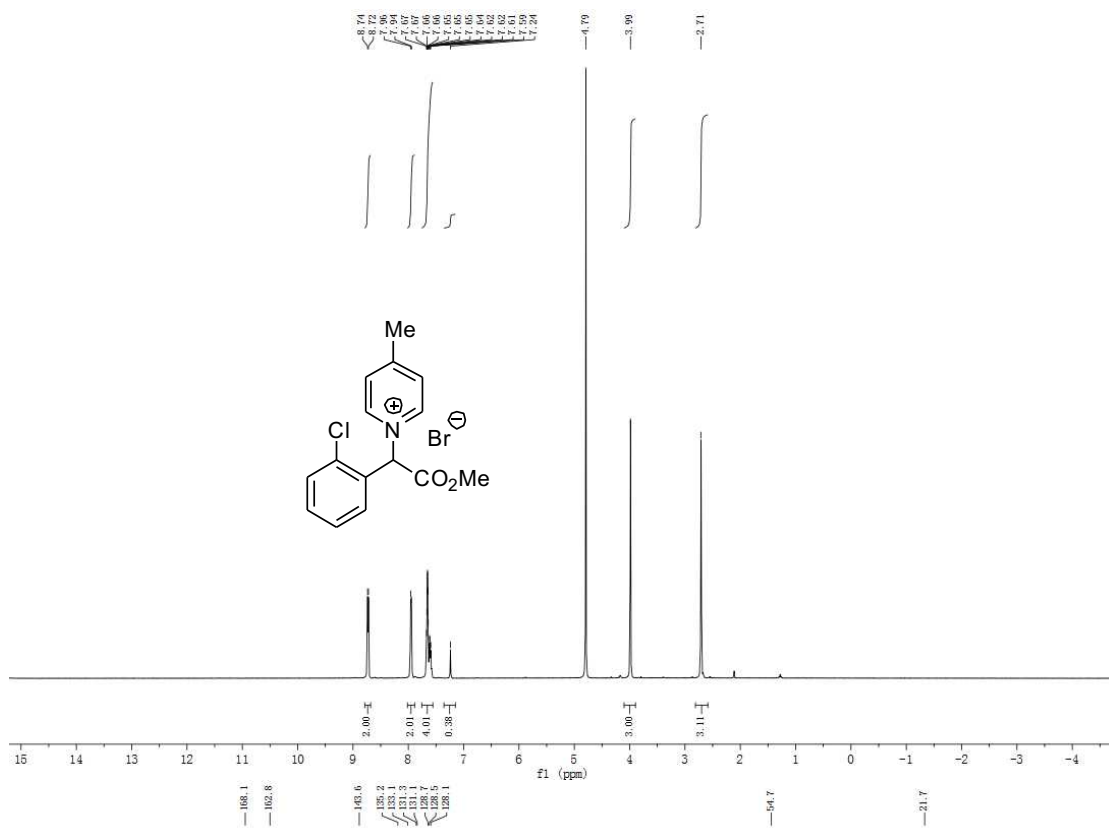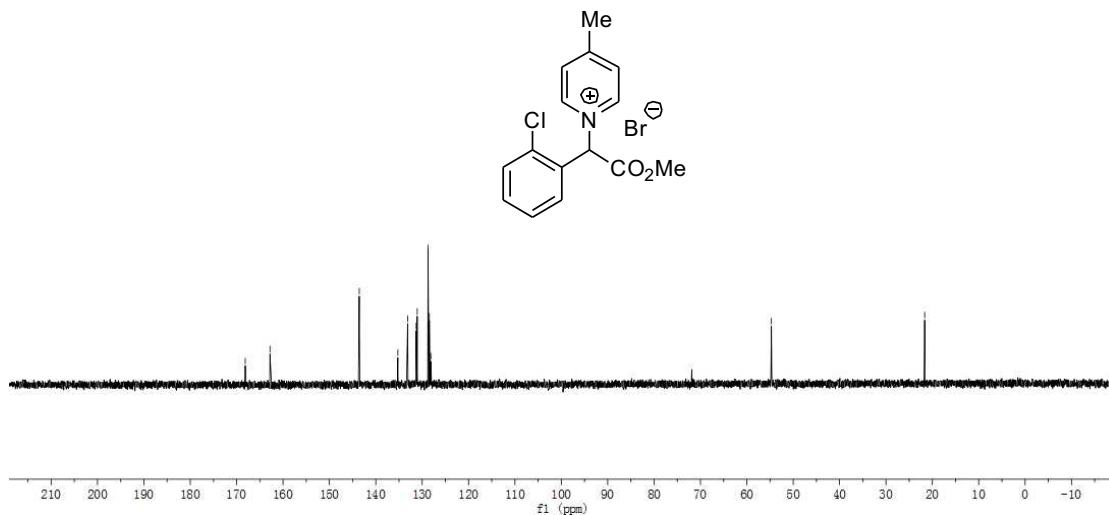

**1i:**  
4-acetyl-1-(1-(2-chlorophenyl)-2-methoxy-2-oxoethyl)pyridin-1-ium bromide

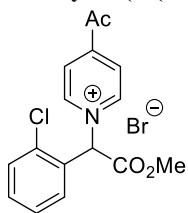

Synthesis procedure for **1i**: 1-(pyridin-4-yl)ethan-1-one (8mmol) and methyl 2-bromo-2-(2-chlorophenyl)acetate (9mmol) were added in 4mL of ethyl acetate and stirred at room temperature for 10 hours. Then the resulting precipitate was filtered and washed with ethyl acetate to afford **1i**, as brown solid (1.173g, yield=38%).

$^1\text{H}$  NMR (400 MHz, DMSO- $d_6$ )  $\delta$  9.31 – 9.27 (m, 2H), 8.53 (d,  $J$  = 6.7 Hz, 2H), 7.79 (dd,  $J$  = 7.4, 1.9 Hz, 1H), 7.71 – 7.65 (m, 3H), 7.53 (s, 1H), 3.91 (s, 3H), 2.73 (s, 3H).

$^{13}\text{C}$  NMR (101 MHz, DMSO- $d_6$ )  $\delta$  146.7, 134.5, 133.2, 132.3, 130.8, 128.8, 126.3, 72.0, 54.4, 27.3.

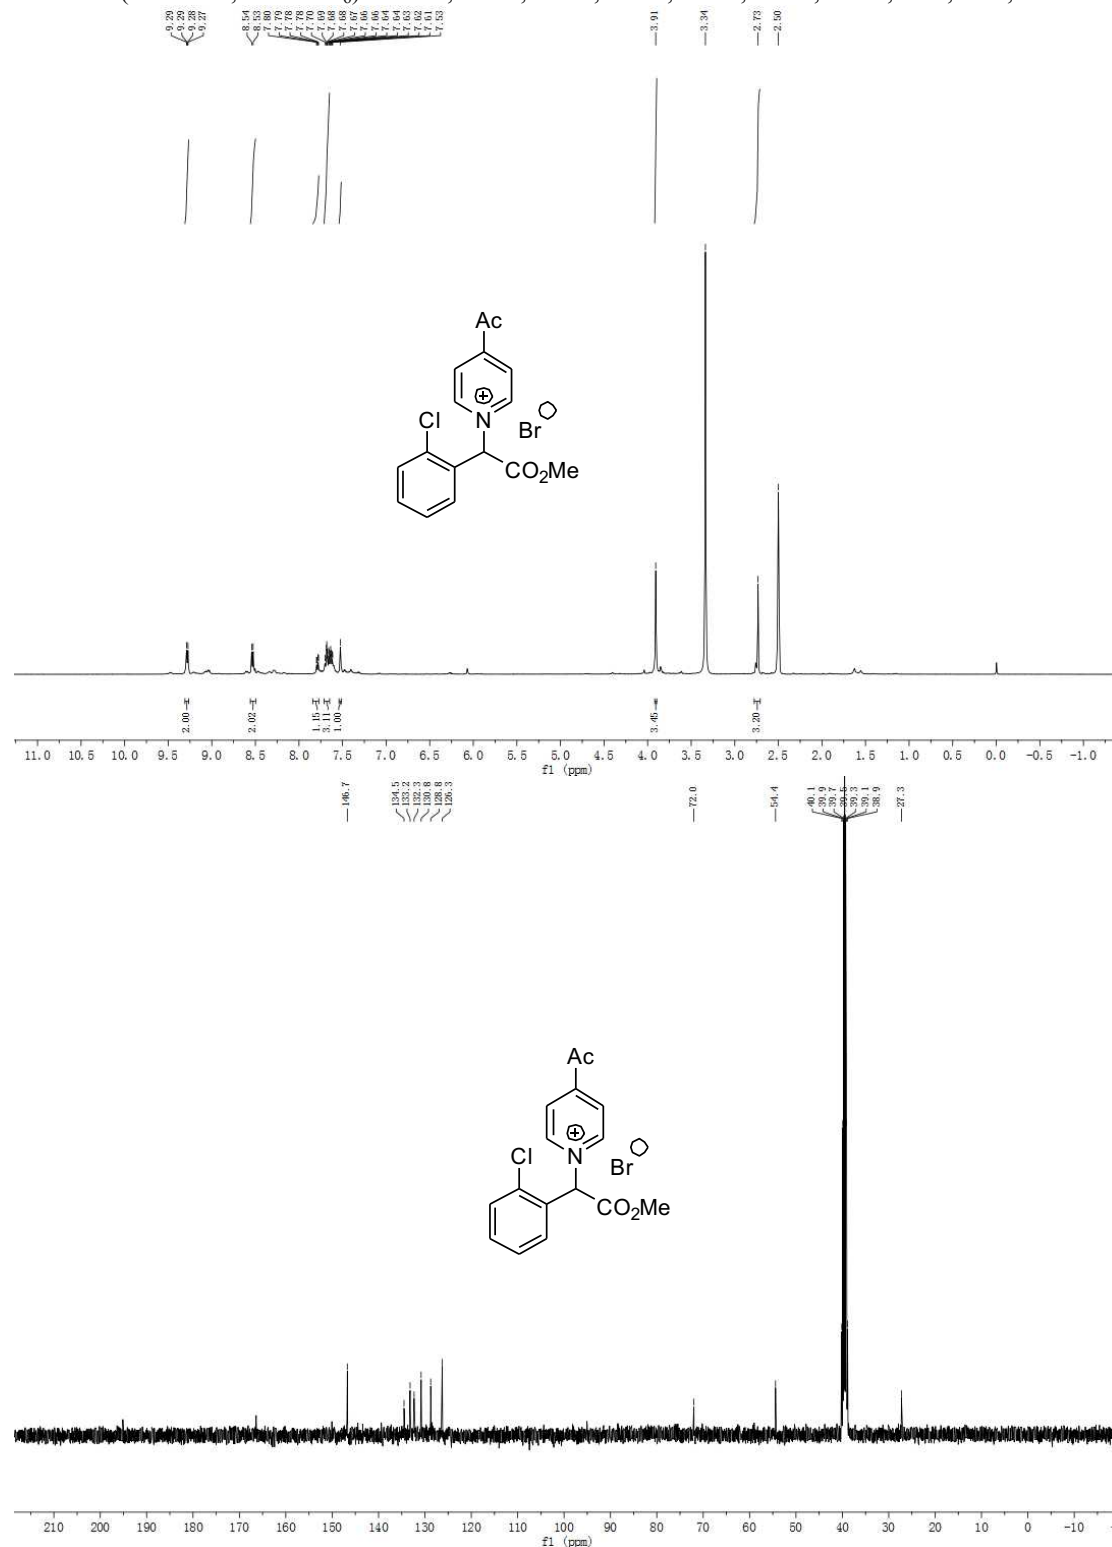

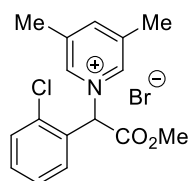

Synthesis procedure for **1j**: 3,5-dimethylpyridine (8mmol) and methyl 2-bromo-2-(2-chlorophenyl)acetate (5mmol) were added in 3mL of ethyl acetate and stirred at room temperature for 10 hours. Then the resulting precipitate was filtered and washed with ethyl acetate to afford **1j**, as brown solid (1.686g, yield=91%).

$^1\text{H NMR}$  (400 MHz,  $\text{DMSO-}d_6$ )  $\delta$  8.89 (s, 2H), 8.51 (s, 1H), 7.77 (d,  $J = 7.5$  Hz, 1H), 7.72 – 7.54 (m, 3H), 7.40 (s, 1H), 3.89 (s, 3H), 2.51 (s, 3H).

$^{13}\text{C NMR}$  (101 MHz,  $\text{DMSO-}d_6$ )  $\delta$  166.6, 148.9, 141.7, 138.4, 134.5, 132.9, 132.3, 130.6, 128.6, 128.6, 71.6, 54.3, 17.8.

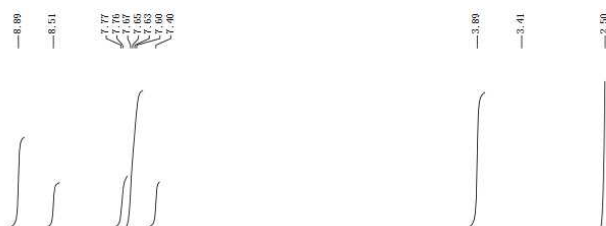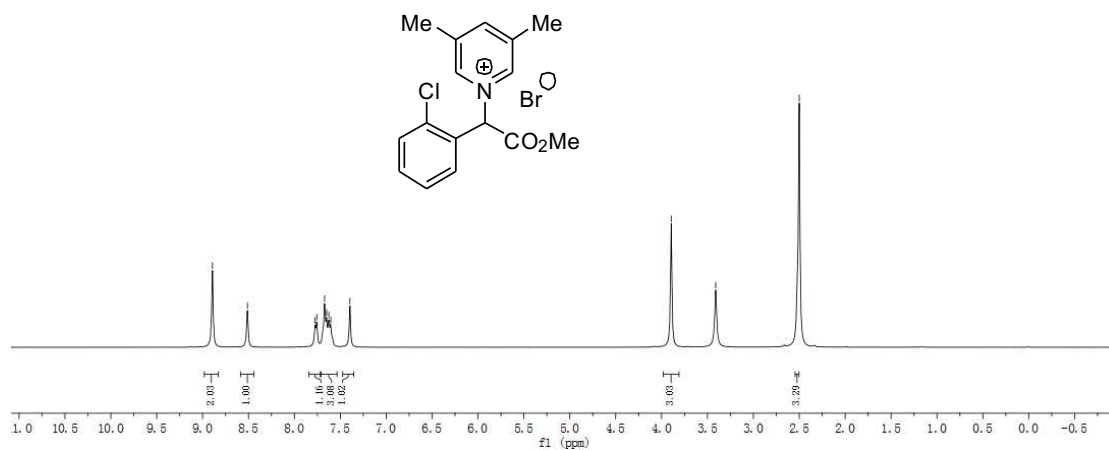

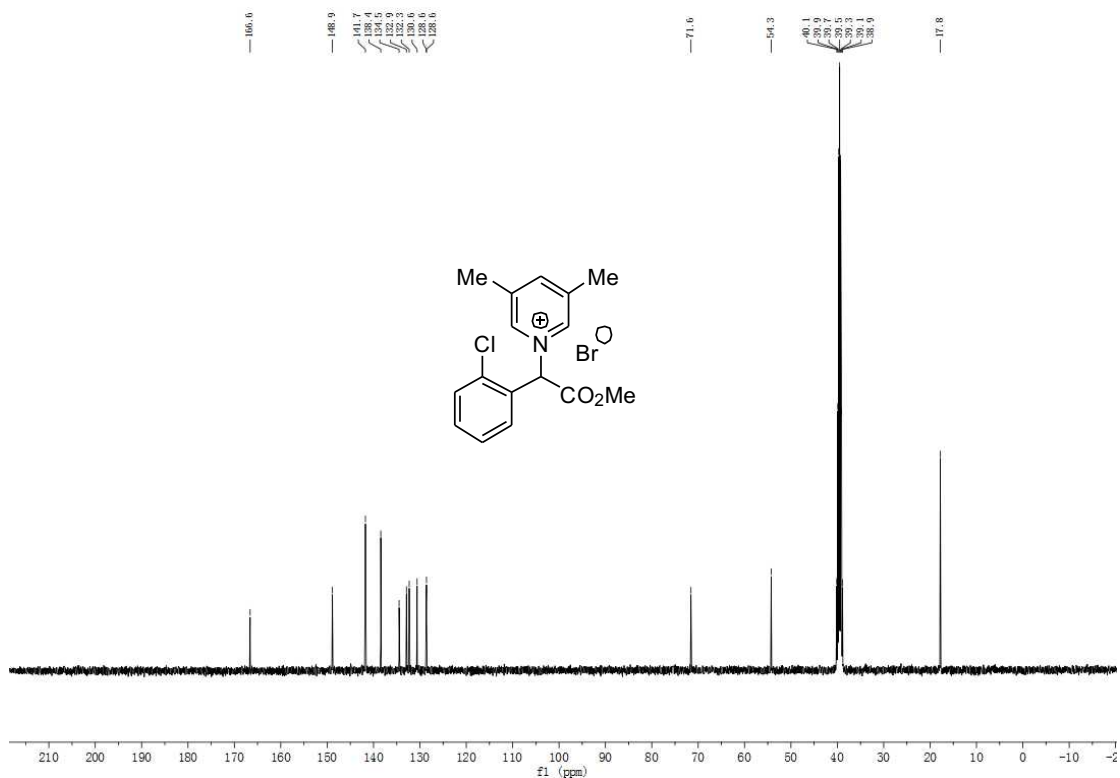

**1k:**

**2-(1-(2-chlorophenyl)-2-methoxy-2-oxoethyl)isoquinolin-2-ium bromide**

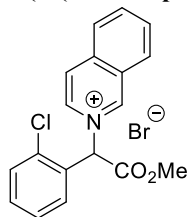

Synthesis procedure for **1k**: isoquinoline (8mmol) and methyl 2-bromo-2-(2-chlorophenyl)acetate (5mmol) were added in 3mL of ethyl acetate and stirred at room temperature for 10 hours. Then the resulting precipitate was filtered and washed with ethyl acetate to afford **1k**, as orange solid (1.928g, yield=98%).

<sup>1</sup>H NMR (400 MHz, DMSO-*d*<sub>6</sub>) δ 10.11 (s, 1H), 8.81 (d, *J* = 6.9 Hz, 1H), 8.66 (t, *J* = 7.2 Hz, 2H), 8.46 – 8.27 (m, 2H), 8.12 (t, *J* = 7.6 Hz, 1H), 7.89 – 7.76 (m, 1H), 7.73 – 7.58 (m, 3H), 7.53 (s, 1H), 3.91 (s, 3H).

<sup>13</sup>C NMR (101 MHz, DMSO-*d*<sub>6</sub>) δ 166.8, 150.8, 138.4, 137.8, 134.8, 134.6, 133.0, 132.2, 131.7, 131.3, 130.7, 128.8, 128.7, 127.4, 127.0, 126.1, 71.8, 54.3.



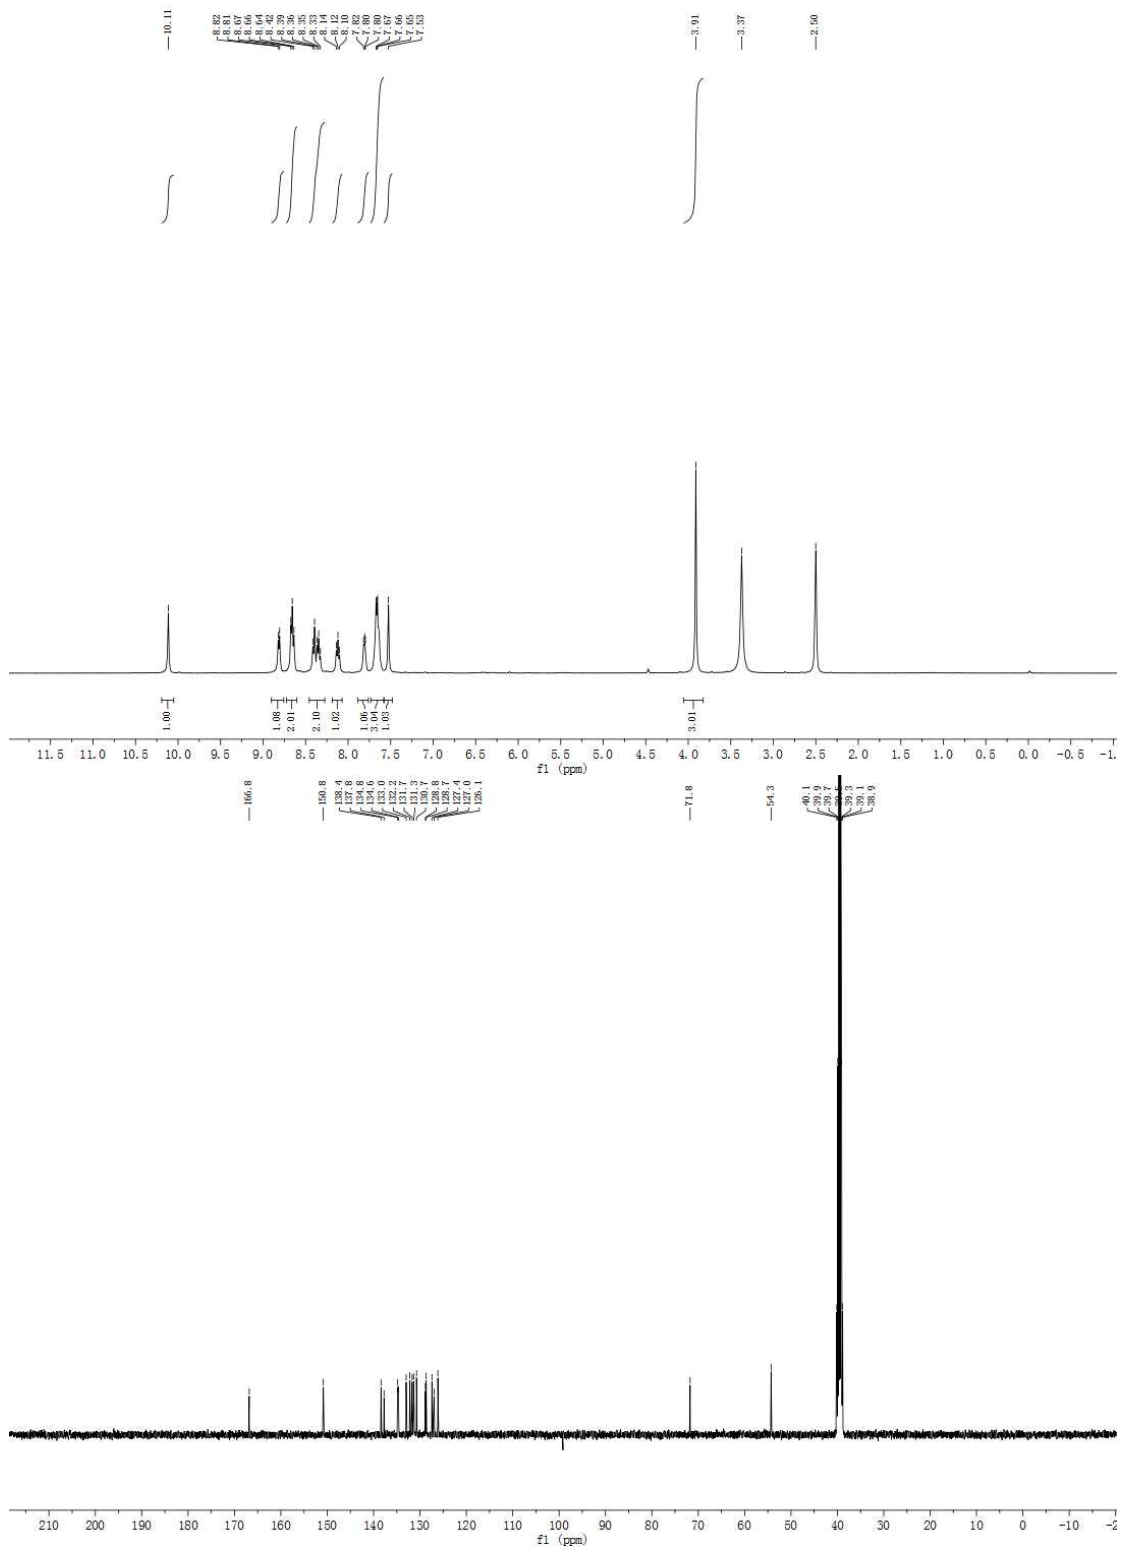

### 3. Synthesis of Products and Spectra Data

**3aa:**

**2-benzyl-4-(2-chlorophenyl)pyrrolo[3,4-a]quinolizine-1,3,5(2H)-trione**

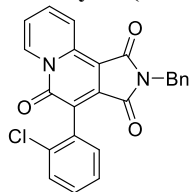

**General procedure:** 1-(1-(2-chlorophenyl)-2-methoxy-2-oxoethyl)pyridin-1-ium bromide **1a** (0.36mmol, 123.3mg, 1.2equiv), 1-benzyl-1H-pyrrole-2,5-dione **2a** (0.3mmol, 56.2mg, 1.0equiv), 1,4-Diazabicyclo[2.2.2]octane (DABCO, 0.6mmol, 67.3mg, 2.0equiv) were added sequentially to 3.0mL of 1,2-Dichloroethane. The mixture was stirred at 60°C for 20h in open flask. Then solvent was removed by rotary evaporator, the residual crude products was purified by column chromatography (SiO<sub>2</sub>, PE/EA=2:1, v/v; R<sub>f</sub>=0.4) to afford compound **3aa** (yellow solid, m.p=87-89°C, 117.1mg, yield=94%).

HRMS(ESI<sup>+</sup>)m/z: [M+H]<sup>+</sup> calcd for C<sub>24</sub>H<sub>16</sub>ClN<sub>2</sub>O<sub>3</sub>, 415.0844; found, 415.0842.

<sup>1</sup>H NMR (400 MHz, DMSO-*d*<sub>6</sub>) δ 9.16 – 9.11 (m, 1H), 8.64 (dt, *J* = 8.8, 1.2 Hz, 1H), 8.07 (ddd, *J* = 8.9, 6.8, 1.3 Hz, 1H), 7.57 – 7.38 (m, 5H), 7.34 – 7.23 (m, 5H), 4.69 (s, 2H).

<sup>13</sup>C NMR (101 MHz, DMSO-*d*<sub>6</sub>) δ 166.0, 165.3, 157.9, 140.0, 137.1, 136.6, 133.5, 132.5, 131.7, 129.9, 129.1, 128.9, 128.6, 127.6, 127.5, 126.7, 121.9, 118.4, 98.1, 40.9.

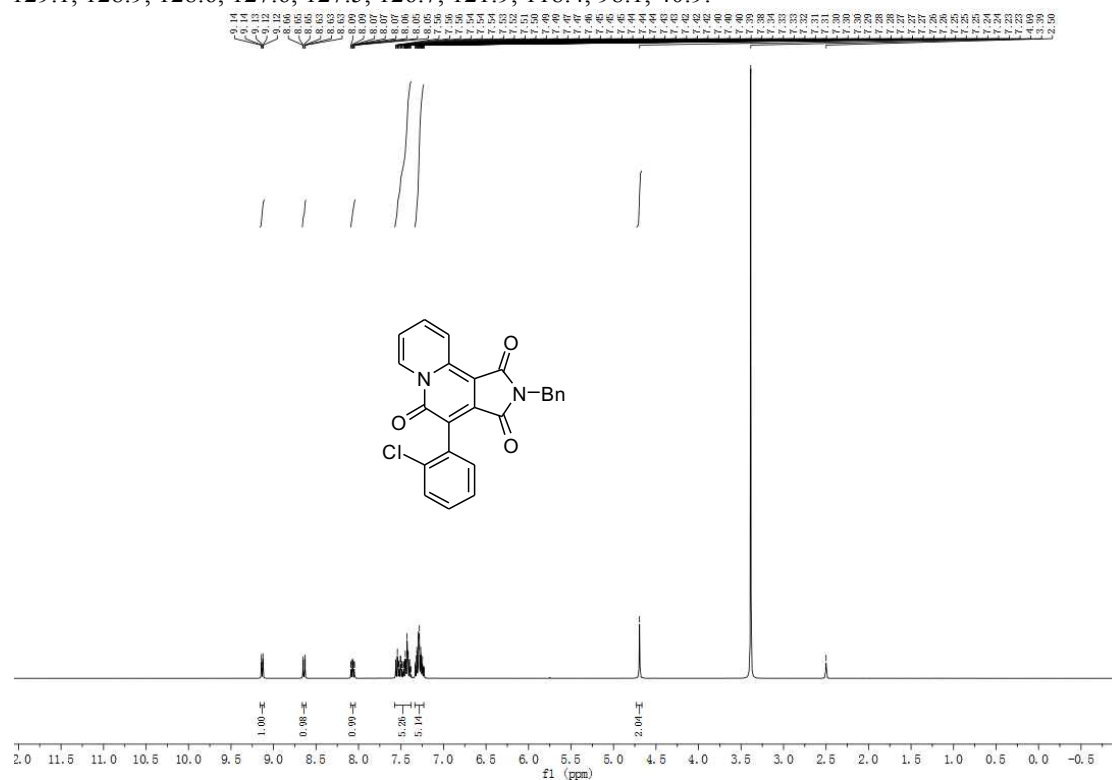

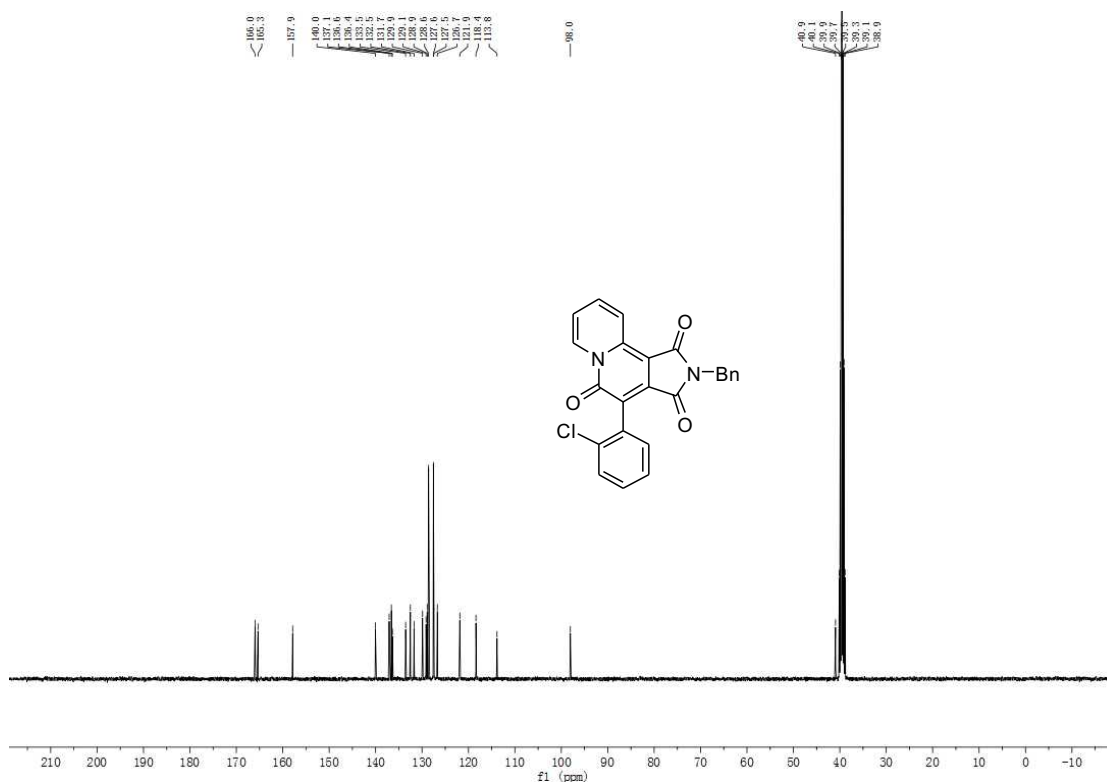

**3ba:**

**2-benzyl-4-phenylpyrrolo[3,4-a]quinolizine-1,3,5(2H)-trione**

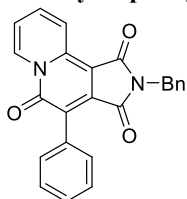

**General procedure:** 1-(2-methoxy-2-oxo-1-phenylethyl)pyridin-1-ium bromide **1b** (0.36mmol, 111.0mg, 1.2equiv), 1-benzyl-1H-pyrrole-2,5-dione **2a** (0.3mmol, 56.2mg, 1.0equiv), 1,4-Diazabicyclo[2.2.2]octane (DABCO, 0.6mmol, 67.3mg, 2.0equiv) were added sequentially to 3.0mL of 1,2-Dichloroethane. The mixture was stirred at 60°C for 20h in open flask. Then solvent was removed by rotary evaporator, the residual crude products was purified by column chromatography (SiO<sub>2</sub>, PE/EA=2:1, v/v; R<sub>f</sub>=0.4) to afford compound **3ba** (yellow solid, m.p=109-111°C, 89.2mg, yield=78%). HRMS(ESI<sup>+</sup>)m/z: [M+H]<sup>+</sup> calcd for C<sub>24</sub>H<sub>17</sub>N<sub>2</sub>O<sub>3</sub>, 381.1234; found, 381.1234.

<sup>1</sup>H NMR (400 MHz, Chloroform-*d*) δ 9.17 (d, *J* = 7.3 Hz, 1H), 8.80 (d, *J* = 8.9 Hz, 1H), 7.72 (ddd, *J* = 9.0, 6.7, 1.3 Hz, 1H), 7.55 – 7.40 (m, 7H), 7.31 – 7.19 (m, 4H), 4.80 (s, 2H).

<sup>13</sup>C NMR (101 MHz, Chloroform-*d*) δ 166.4, 165.8, 159.5, 139.9, 136.3, 135.2, 134.6, 131.3, 130.6, 128.9, 128.8, 128.7, 128.6, 127.8, 122.8, 119.4, 117.0, 99.4, 41.8.

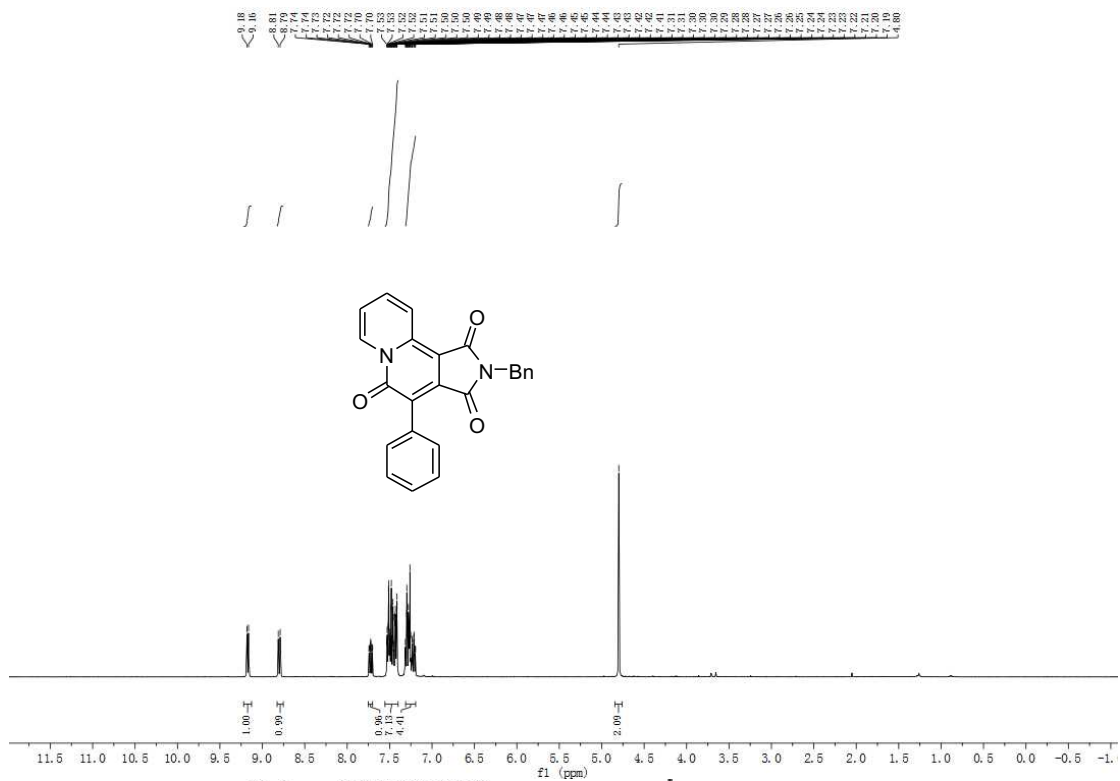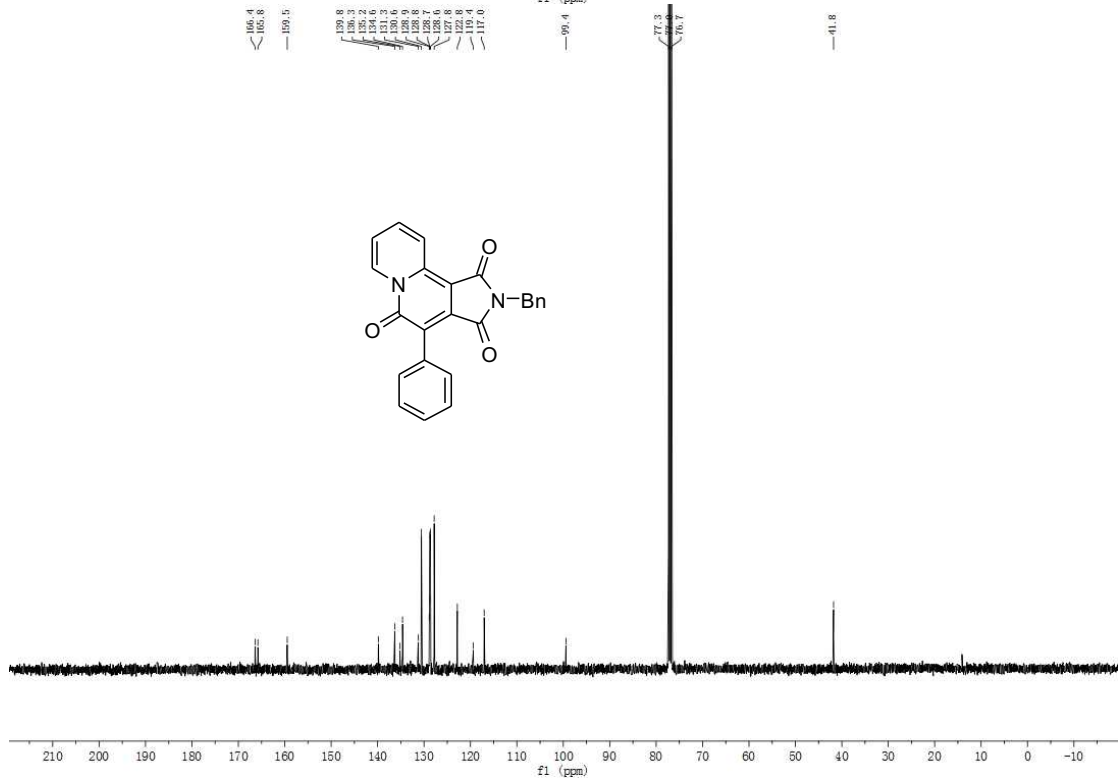

**3ca:**  
**2-benzyl-4-methylpyrrolo[3,4-a]quinolizine-1,3,5(2H)-trione**

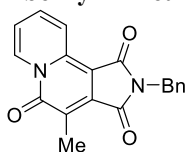

**General procedure:** 1-(1-methoxy-1-oxopropan-2-yl)pyridin-1-ium bromide **1c** (0.36mmol, 88.6mg, 1.2equiv), 1-benzyl-1H-pyrrole-2,5-Dione **2a** (0.3mmol, 56.2mg, 1.0equiv), 1,4-Diazabicyclo[2.2.2]octane (DABCO, 0.6mmol, 67.3mg, 2.0equiv) were added sequentially to 3.0mL of CH<sub>3</sub>CN. The mixture

was stirred at 60°C for 20h in open flask. Then solvent was removed by rotary evaporator, the residual crude products was purified by column chromatography (SiO<sub>2</sub>, PE/EA=1:1, v/v; Rf=0.45) to afford compound **3ca** (yellow solid, m.p.=195-197°C, 56.2mg, yield=59%).

HRMS(ESI<sup>+</sup>)m/z: [M+H]<sup>+</sup> calcd for C<sub>19</sub>H<sub>15</sub>N<sub>2</sub>O<sub>3</sub>, 319.1077; found, 319.1074.

<sup>1</sup>H NMR (400 MHz, Chloroform-*d*) δ 9.05 (dt, *J* = 7.4, 1.1 Hz, 1H), 8.65 (dt, *J* = 9.0, 1.1 Hz, 1H), 7.61 (ddd, *J* = 9.0, 6.6, 1.3 Hz, 1H), 7.47 – 7.42 (m, 2H), 7.36 – 7.27 (m, 3H), 7.13 (ddd, *J* = 7.4, 6.6, 1.5 Hz, 1H), 4.84 (s, 2H), 2.64 (s, 3H).

<sup>13</sup>C NMR (101 MHz, Chloroform-*d*) δ 167.3, 166.3, 160.5, 138.8, 136.4, 135.2, 133.5, 128.7, 128.6, 128.0, 127.8, 122.6, 118.4, 116.5, 98.8, 77.2, 41.6, 11.7.

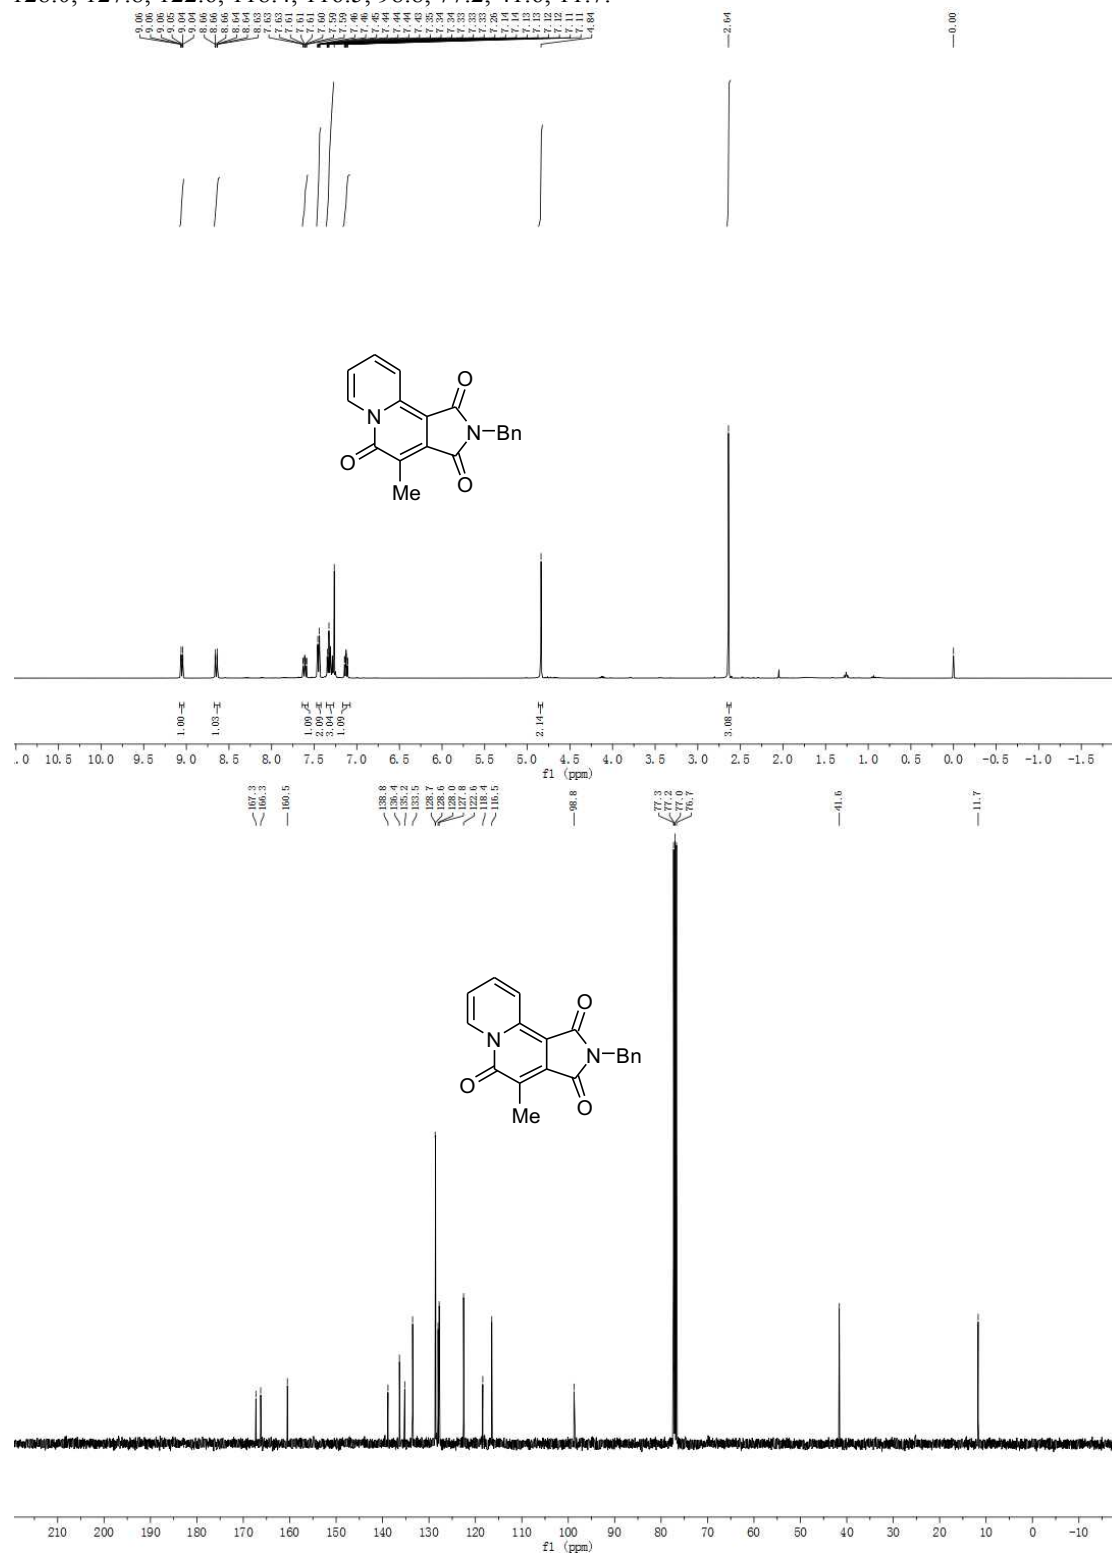

**3da:****ethyl 2-benzyl-1,3,5-trioxo-1,2,3,5-tetrahydropyrrolo[3,4-a]quinolizine-4-carboxylate**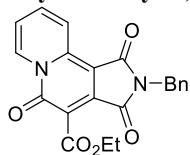

**General procedure:** 1-(1,3-diethoxy-1,3-dioxopropan-2-yl)pyridin-1-ium bromide **1d** (0.36mmol, 114.6mg, 1.2equiv), 1-benzyl-1H-pyrrole-2,5-dione **2a** (0.3mmol, 56.2mg, 1.0equiv), 1,4-Diazabicyclo[2.2.2]octane (DABCO, 0.6mmol, 67.3mg, 2.0equiv) were added sequentially to 3.0mL of 1,2-Dichloroethane. The mixture was stirred at 60°C for 20h in open flask. Then solvent was removed by rotary evaporator, the residual crude products was purified by column chromatography (SiO<sub>2</sub>, PE/EA=1:1, v/v; Rf=0.5) to afford compound **3da** (yellow solid, m.p=169-171°C, 57.2mg, yield=51%). HRMS(ESI<sup>+</sup>)m/z: [M+H]<sup>+</sup> calcd for C<sub>21</sub>H<sub>17</sub>N<sub>2</sub>O<sub>5</sub>, 377.1132; found, 377.1124.

<sup>1</sup>H NMR (400 MHz, DMSO-*d*<sub>6</sub>) δ 9.16 (dt, *J* = 7.2, 1.1 Hz, 1H), 8.60 (dt, *J* = 8.8, 1.2 Hz, 1H), 8.14 (ddd, *J* = 8.7, 6.9, 1.3 Hz, 1H), 7.58 (td, *J* = 7.0, 1.5 Hz, 1H), 7.36 – 7.22 (m, 5H), 4.75 (s, 2H), 4.34 (q, *J* = 7.1 Hz, 2H), 1.30 (t, *J* = 7.1 Hz, 3H).

<sup>13</sup>C NMR (101 MHz, DMSO-*d*<sub>6</sub>) δ 165.8, 165.0, 163.2, 156.1, 140.7, 138.1, 136.5, 136.3, 129.6, 128.6, 127.51, 127.5, 122.0, 119.0, 107.2, 98.3, 61.6, 41.0, 13.9.

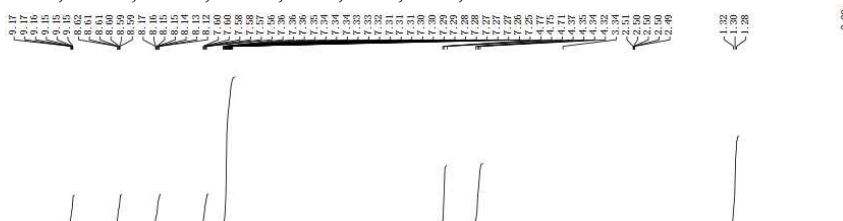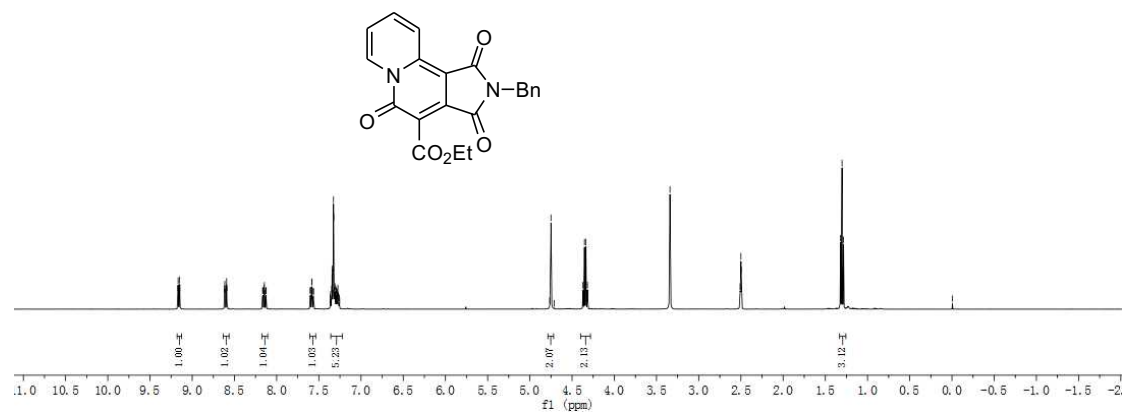

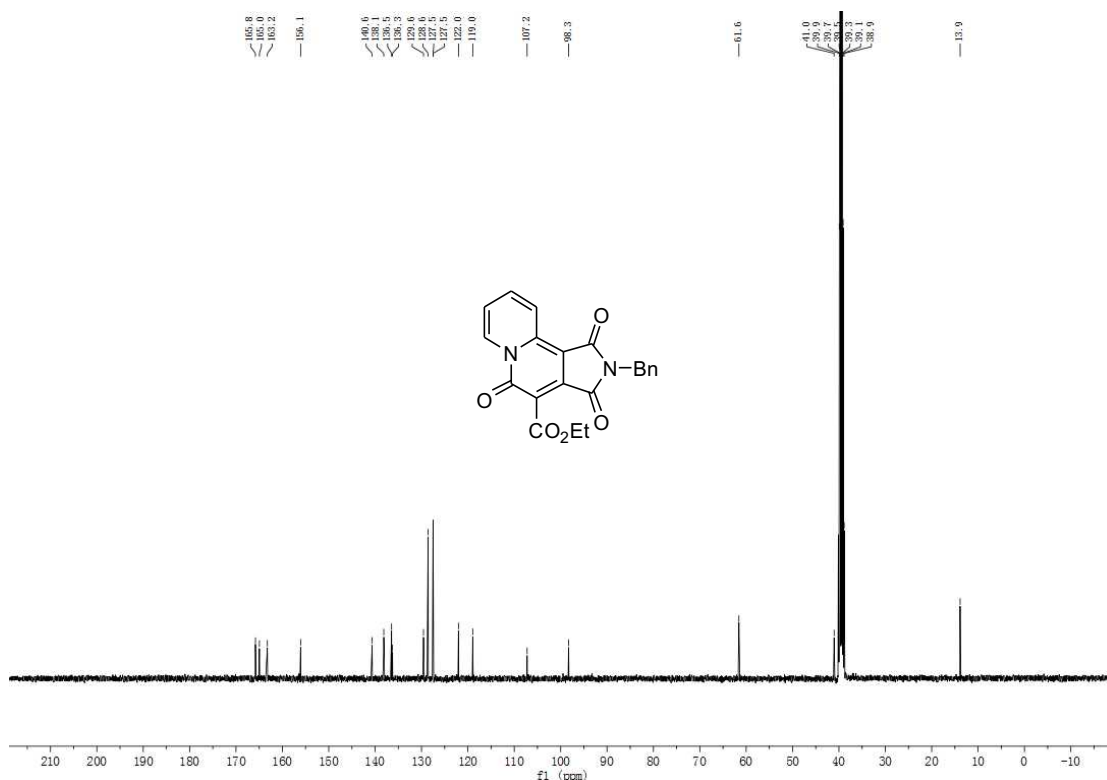

**3ea:**

**2-benzylpyrrolo[3,4-a]quinolizine-1,3,5(2H)-trione**

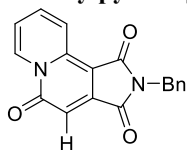

**General procedure:** 1-(2-methoxy-2-oxoethyl)pyridin-1-ium bromide **1e** (0.36mmol, 83.6mg, 1.2equiv), 1-benzyl-1H-pyrrole-2,5-dione **2a** (0.3mmol, 56.2mg, 1.0equiv), 2,2,6,6-Tetramethylpiperidoxyl (TEMPO, 0.6mmol, 93.8mg, 2.0equiv), 1,8-Diazabicyclo[5.4.0]undec-7-ene (DBU, 0.6mmol, 90.0μL, 2.0equiv) were added sequentially to 3.0mL of CH<sub>3</sub>CN. The mixture was stirred at 80°C for 15h in N<sub>2</sub> atmosphere. Then solvent was removed by rotary evaporator, the residual crude products was purified by column chromatography (SiO<sub>2</sub>, PE/EA=1:1, v/v; R<sub>f</sub>=0.4) to afford compound **3ea** (yellow solid, m.p=171-174°C, 14.1mg, yield=15%).

HRMS(ESI<sup>+</sup>)m/z: [M+H]<sup>+</sup> calcd for C<sub>18</sub>H<sub>13</sub>N<sub>2</sub>O<sub>3</sub>, 305.0921; found, 305.0912.

<sup>1</sup>H NMR (400 MHz, Chloroform-*d*) δ 9.17 (dd, *J* = 7.4, 1.1 Hz, 1H), 8.68 (dt, *J* = 8.9, 1.2 Hz, 1H), 7.77 (ddd, *J* = 8.9, 6.7, 1.4 Hz, 1H), 7.48 – 7.42 (m, 2H), 7.35 – 7.23 (m, 4H), 6.90 (s, 1H), 4.85 (s, 2H).

<sup>13</sup>C NMR (101 MHz, Chloroform-*d*) δ 166.4, 166.2, 159.2, 141.0, 136.2, 135.4, 128.9, 128.7, 128.6, 127.9, 122.8, 117.0, 102.2, 99.2, 41.8.

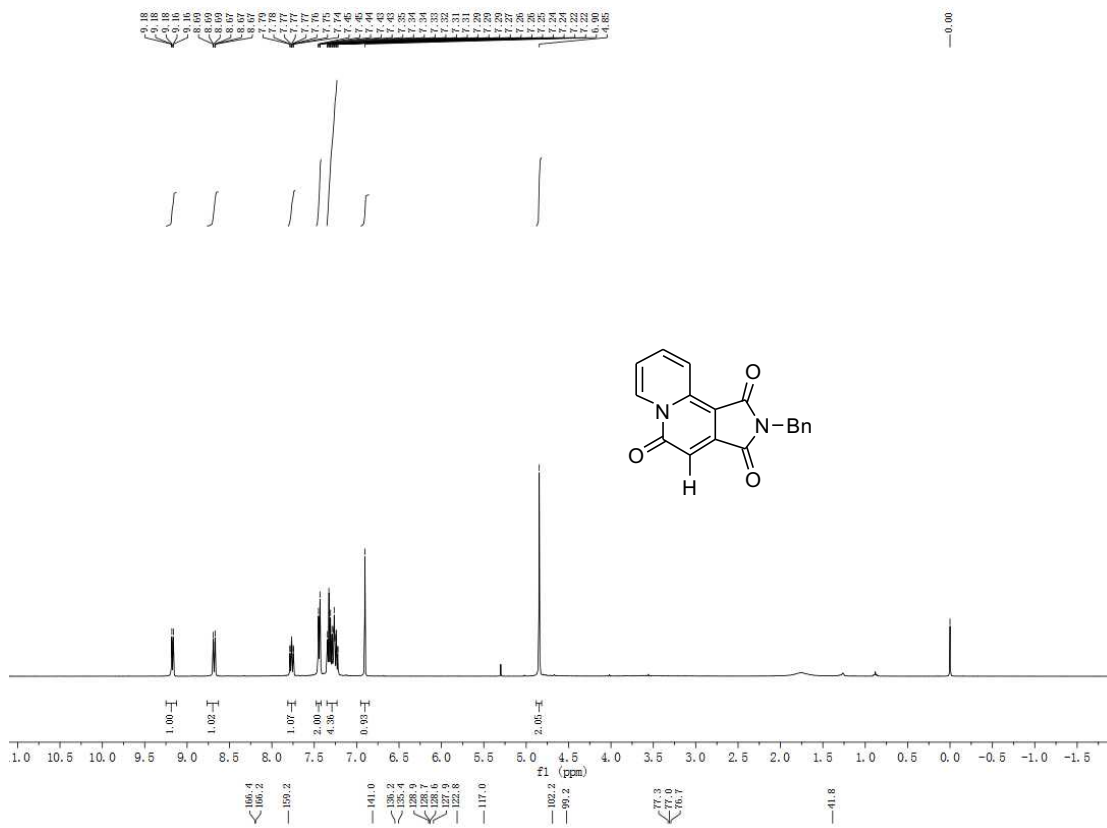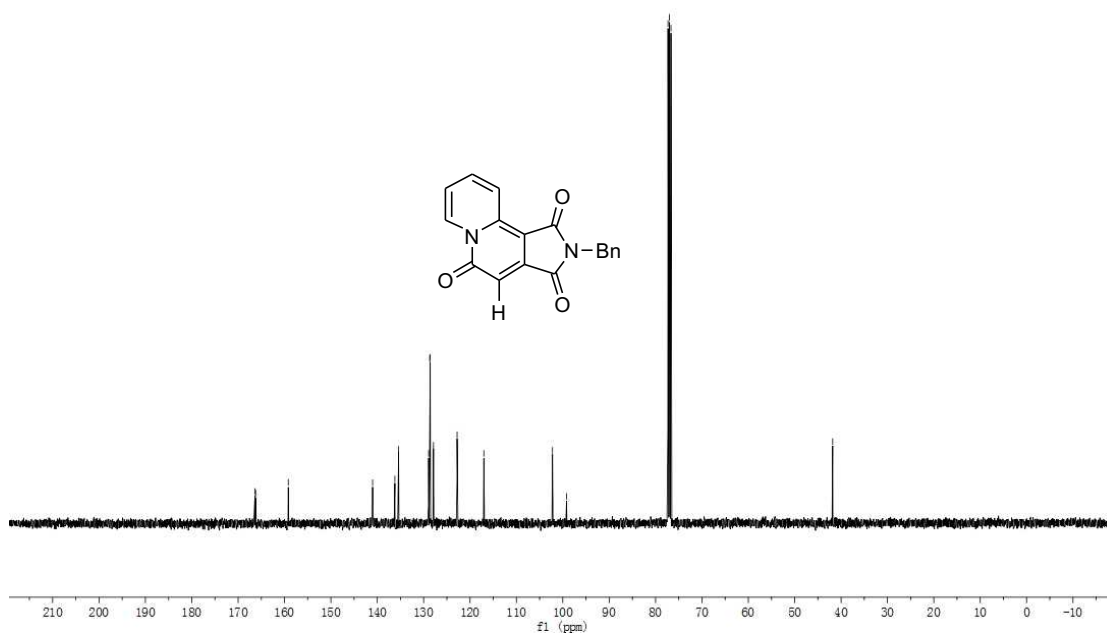

**3fa:**  
2-benzyl-4-(2-chlorophenyl)-9-methoxypyrrolo[3,4-a]quinolizine-1,3,5(2H)-trione

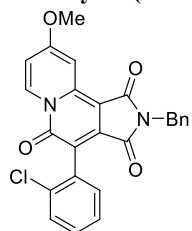



**General procedure:** 1-(1-(2-chlorophenyl)-2-methoxy-2-oxoethyl)-4-methoxypyridin-1-ium bromide **1f** (0.36mmol, 134.3mg, 1.2equiv), 1-benzyl-1H-pyrrole-2,5-dione **2a** (0.3mmol, 56.2mg, 1.0equiv), 1,8-Diazabicyclo[5.4.0]undec-7-ene (DBU, 0.75mmol, 113.0 $\mu$ L, 2.5equiv) were added sequentially to 2.0mL of CH<sub>3</sub>CN. The mixture was stirred at 60°C for 20h in O<sub>2</sub> atmosphere. Then solvent was removed by rotary evaporator, the residual crude products was purified by column chromatography (SiO<sub>2</sub>, PE/EA=2:1, v/v; R<sub>f</sub>=0.3) to afford compound **3fa** (yellow solid, m.p=88-90°C, 47.9mg, yield=36%).

HRMS(ESI<sup>+</sup>)m/z: [M+H]<sup>+</sup> calcd for C<sub>25</sub>H<sub>18</sub>ClN<sub>2</sub>O<sub>4</sub>, 445.0950; found, 445.0945.

<sup>1</sup>H NMR (400 MHz, DMSO-*d*<sub>6</sub>)  $\delta$  9.03 (d, *J* = 8.0 Hz, 1H), 7.90 (d, *J* = 2.8 Hz, 1H), 7.56 – 7.51 (m, 1H), 7.46 – 7.38 (m, 3H), 7.33 – 7.24 (m, 5H), 7.19 (dd, *J* = 8.0, 2.9 Hz, 1H), 4.67 (s, 2H), 4.06 (s, 3H).

<sup>13</sup>C NMR (101 MHz, DMSO-*d*<sub>6</sub>)  $\delta$  166.2, 165.4, 164.8, 157.9, 142.3, 137.1, 136.7, 133.7, 132.6, 131.8, 131.5, 129.7, 128.8, 128.6, 127.5, 127.4, 126.6, 112.0, 111.5, 98.8, 95.6, 56.9, 40.8.

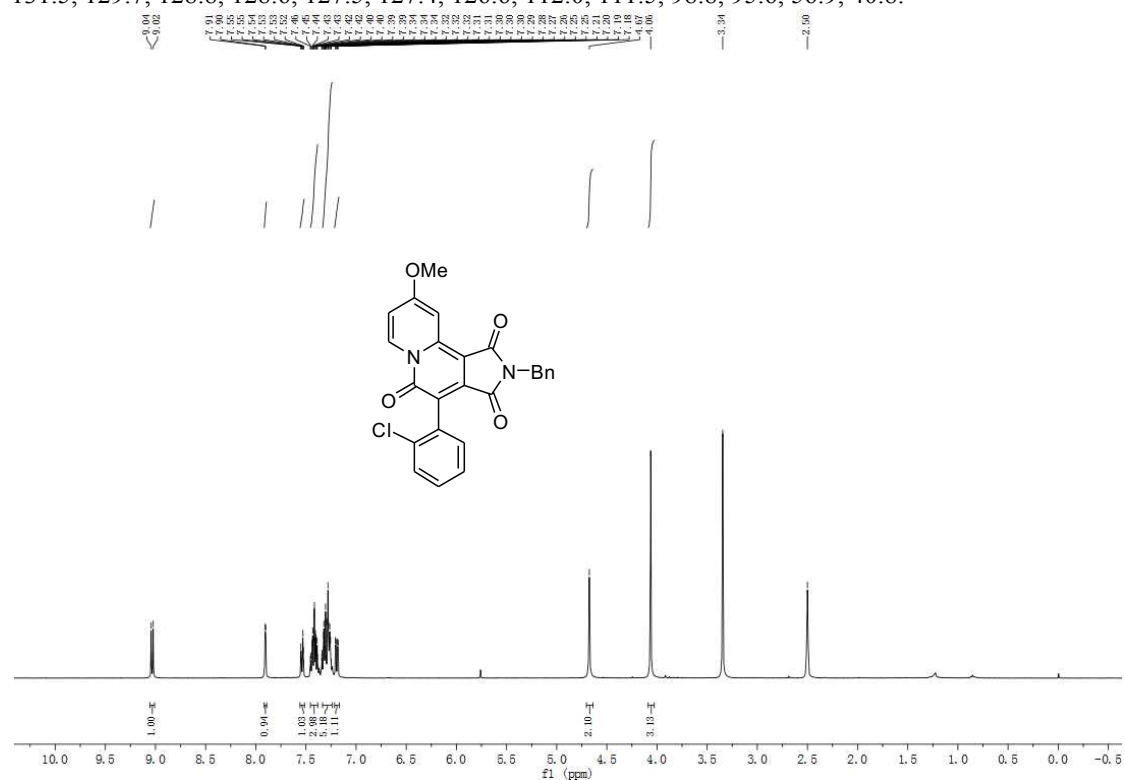

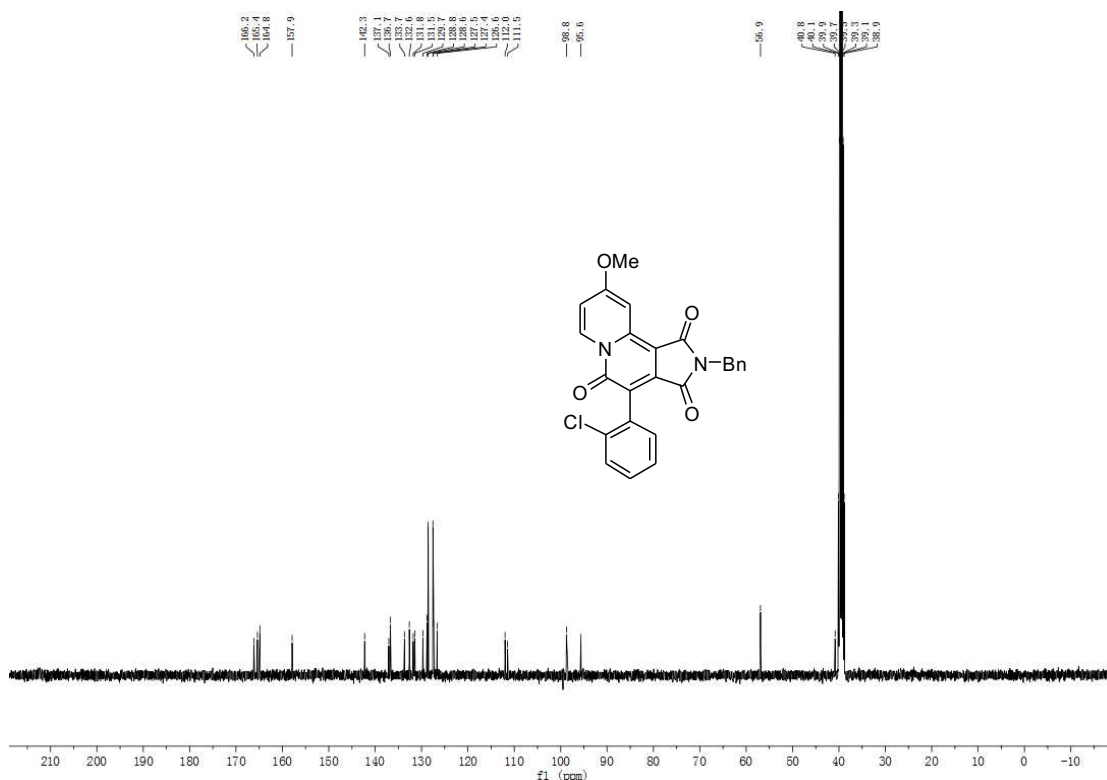

### 3ga:

#### 2-benzyl-9-(*tert*-butyl)-4-(2-chlorophenyl)pyrrolo[3,4-*a*]quinolizine-1,3,5(2H)-trione

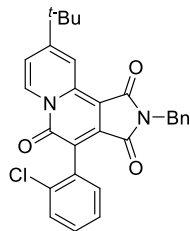

**General procedure:** 4-(*tert*-butyl)-1-(1-(2-chlorophenyl)-2-methoxy-2-oxoethyl)pyridin-1-ium bromide **1g** (0.36mmol, 143.6mg, 1.2equiv), 1-benzyl-1H-pyrrole-2,5-dione **2a** (0.3mmol, 56.2mg, 1.0equiv), 1,4-Diazabicyclo[2.2.2]octane (DABCO, 0.6mmol, 67.3mg, 2.0equiv) were added sequentially to 3.0mL of 1,2-Dichloroethane. The mixture was stirred at 60°C for 20h in open flask. Then solvent was removed by rotary evaporator, the residual crude products was purified by column chromatography (SiO<sub>2</sub>, PE/EA=5:1, v/v; R<sub>f</sub>=0.3) to afford compound **3ga** (yellow solid, m.p=82-85°C, 133.2mg, yield=94%).

HRMS(ESI<sup>+</sup>)m/z: [M+H]<sup>+</sup> calcd for C<sub>28</sub>H<sub>24</sub>ClN<sub>2</sub>O<sub>3</sub>, 471.1470; found, 471.1472.

<sup>1</sup>H NMR (400 MHz, Chloroform-*d*) δ 9.14 (dd, *J* = 7.7, 0.7 Hz, 1H), 8.72 (dd, *J* = 2.3, 0.8 Hz, 1H), 7.53 (ddd, *J* = 5.8, 2.8, 1.7 Hz, 1H), 7.45 – 7.37 (m, 5H), 7.34 – 7.26 (m, 4H), 4.84 – 4.73 (m, 2H), 1.44 (s, 9H).

<sup>13</sup>C NMR (101 MHz, Chloroform-*d*) δ 166.6, 165.6, 160.2, 158.4, 140.5, 137.1, 136.3, 134.3, 131.9, 131.2, 129.8, 129.4, 128.7, 128.5, 128.5, 127.7, 126.5, 117.3, 116.6, 114.5, 98.4, 77.20, 41.6, 35.6, 29.7.

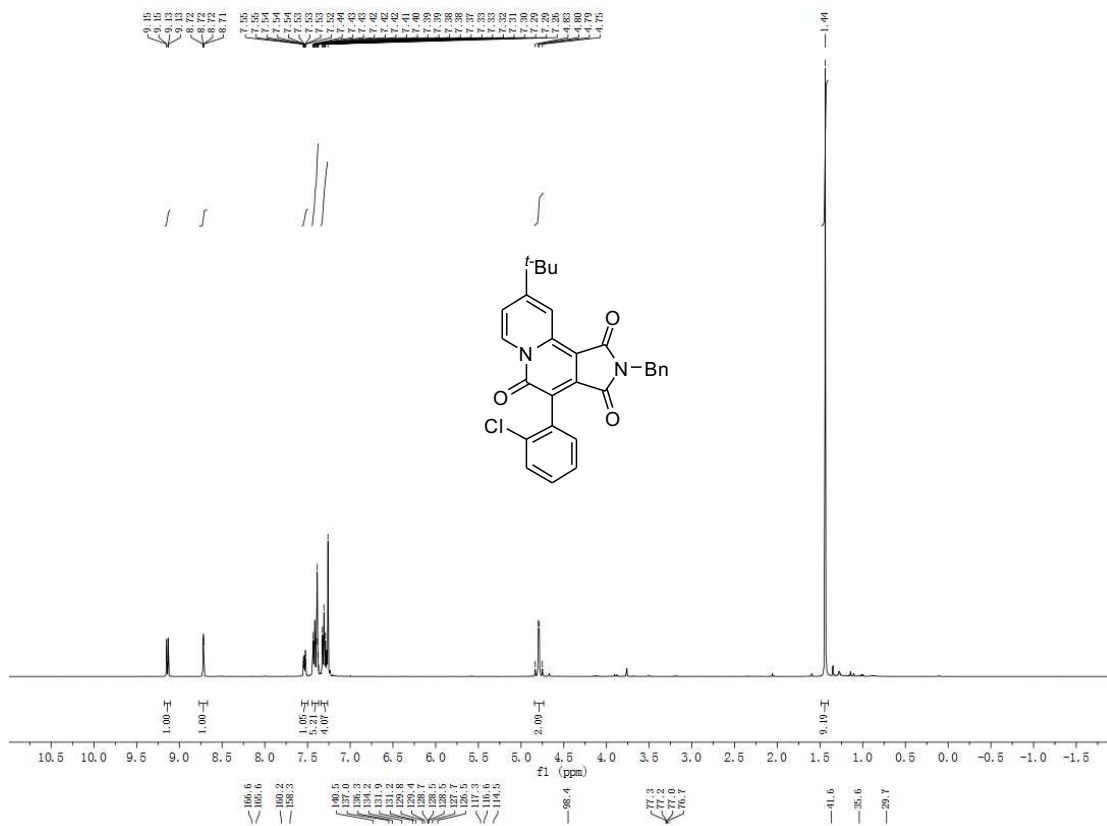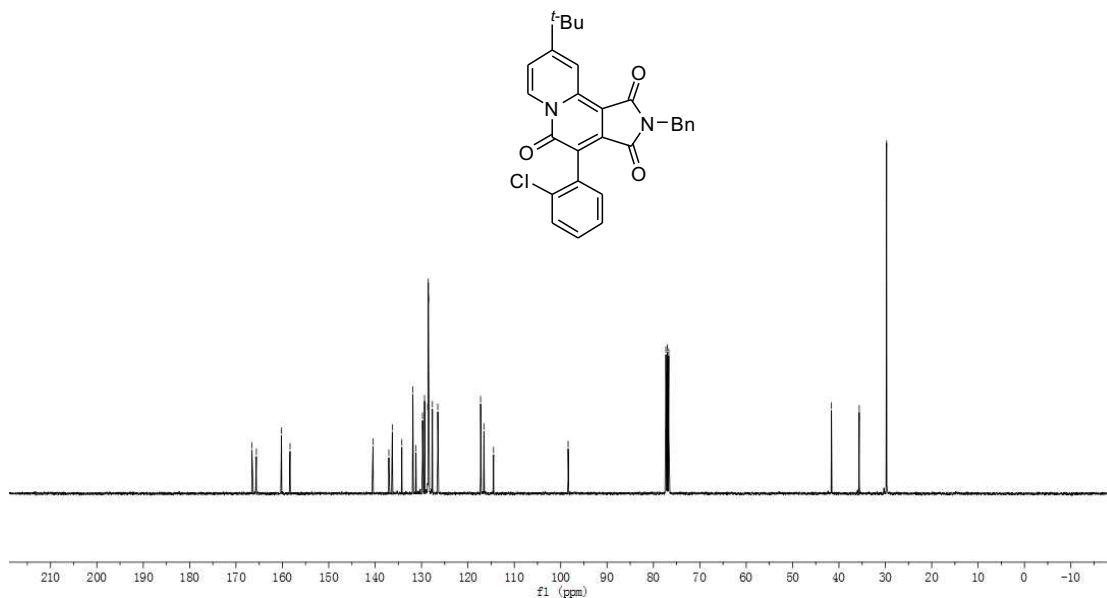

**3ha:**  
**2-benzyl-4-(2-chlorophenyl)-9-methylpyrrolo[3,4-a]quinolizine-1,3,5(2H)-trione**

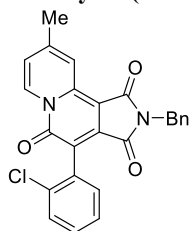

**General procedure:** 1-(1-(2-chlorophenyl)-2-methoxy-2-oxoethyl)-4-methylpyridin-1-ium bromide **1h** (0.36mmol, 128.4mg, 1.2equiv), 1-benzyl-1H-pyrrole-2,5-dione **2a** (0.3mmol, 56.2mg, 1.0equiv), 1,4-Diazabicyclo[2.2.2]octane (DABCO, 0.6mmol, 67.3mg, 2.0equiv) were added sequentially to 3.0mL of 1,2-Dichloroethane. The mixture was stirred at 60°C for 20h in open flask. Then solvent was removed by rotary evaporator, the residual crude products was purified by column chromatography (SiO<sub>2</sub>, PE/EA=2:1, v/v; Rf=0.4) to afford compound **3ha** (yellow solid, m.p.=235-237°C, 55.8mg, yield=43%). HRMS(ESI<sup>+</sup>)m/z: [M+H]<sup>+</sup> calcd for C<sub>25</sub>H<sub>18</sub>ClN<sub>2</sub>O<sub>3</sub>, 429.1000; found, 429.0999.

<sup>1</sup>H NMR (400 MHz, Chloroform-*d*) δ 9.10 (d, *J* = 7.4 Hz, 1H), 8.57 (dt, *J* = 2.1, 1.1 Hz, 1H), 7.57 – 7.50 (m, 1H), 7.43 – 7.35 (m, 5H), 7.33 – 7.23 (m, 3H), 7.08 (dd, *J* = 7.5, 2.0 Hz, 1H), 4.84 – 4.71 (m, 2H), 2.55 (d, *J* = 1.1 Hz, 3H).

<sup>13</sup>C NMR (101 MHz, Chloroform-*d*) δ 166.6, 165.6, 158.5, 148.0, 140.3, 137.2, 136.4, 134.3, 131.9, 131.2, 129.8, 129.4, 128.6, 128.6, 127.7, 126.5, 121.1, 119.8, 114.4, 97.9, 54.8, 41.7, 21.7.

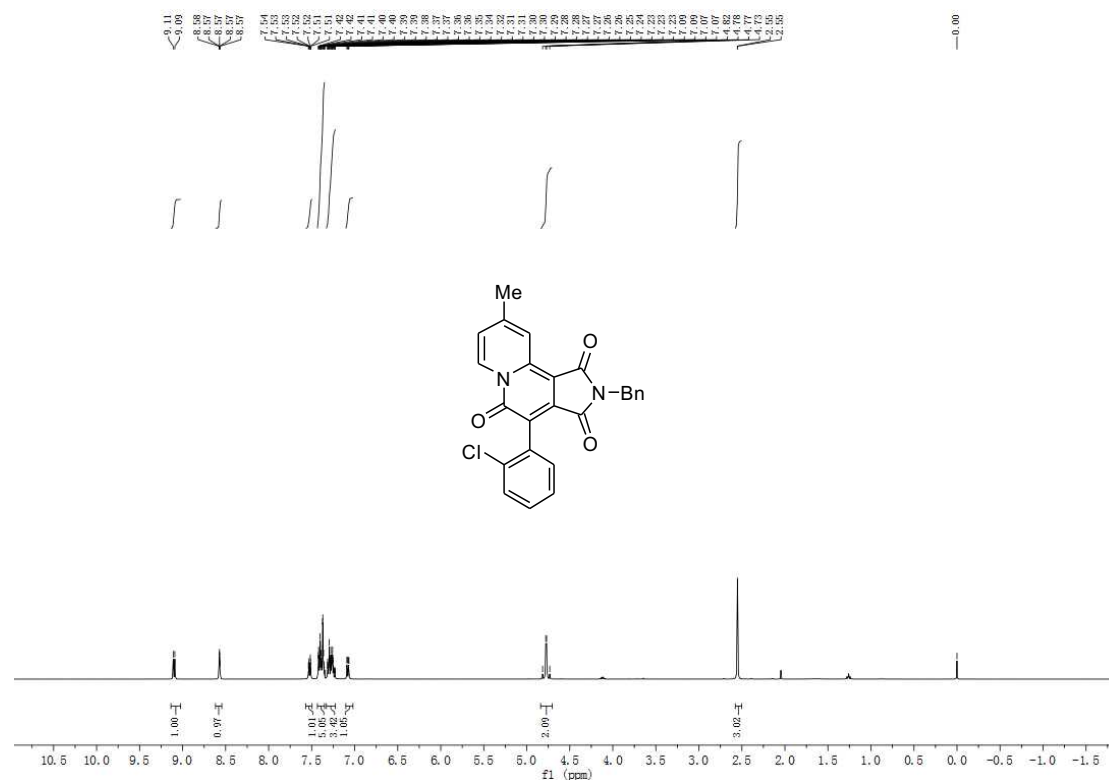

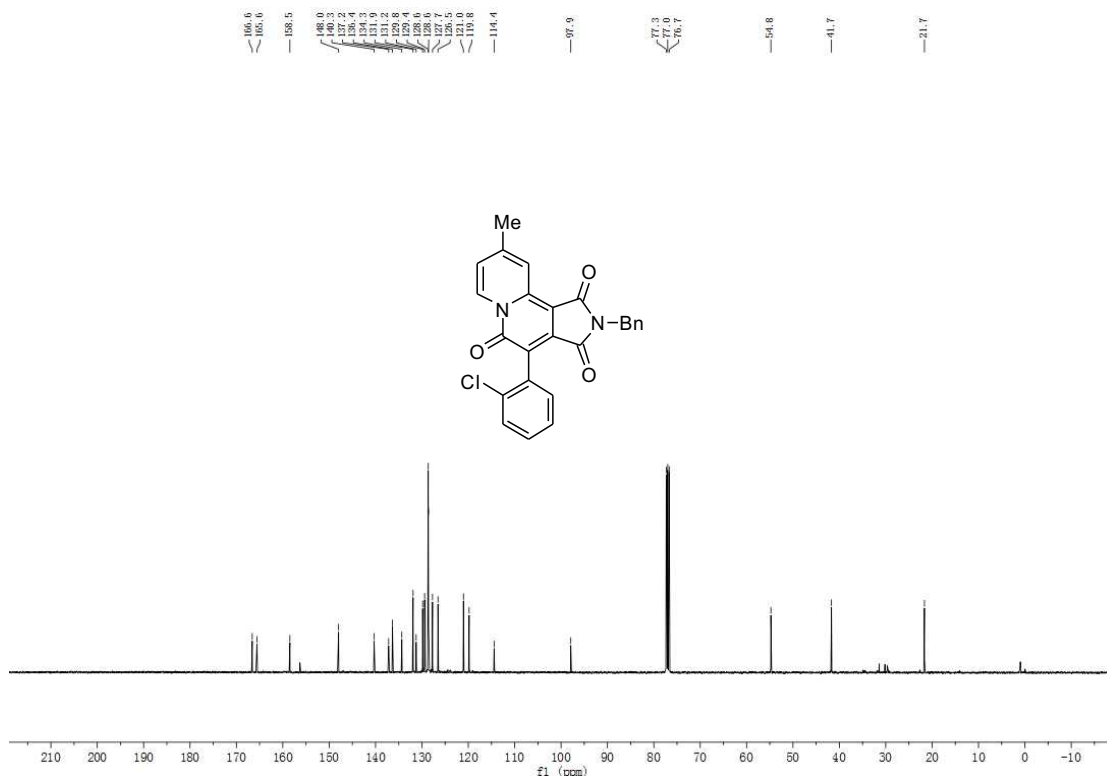

**3ia:**

**9-acetyl-2-benzyl-4-(2-chlorophenyl)pyrrolo[3,4-a]quinolizine-1,3,5(2H)-trione**

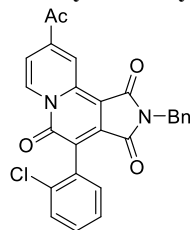

**General procedure:** 4-acetyl-1-(1-(2-chlorophenyl)-2-methoxy-2-oxoethyl)pyridin-1-ium bromide **1i** (0.36mmol, 138.5mg, 1.2equiv), 1-benzyl-1H-pyrrole-2,5-dione **2a** (0.3mmol, 56.2mg, 1.0equiv), 1,4-Diazabicyclo[2.2.2]octane (DABCO, 0.6mmol, 67.3mg, 2.0equiv) were added sequentially to 3.0mL of 1,2-Dichloroethane. The mixture was stirred at 60°C for 20h in open flask. Then solvent was removed by rotary evaporator, the residual crude products was purified by column chromatography (SiO<sub>2</sub>, PE/EA=2:1, v/v; R<sub>f</sub>=0.4) to afford compound **3ia** (yellow solid, m.p=100-102°C, 72.5mg, yield=53%). HRMS(ESI<sup>+</sup>)m/z: [M+H]<sup>+</sup> calcd for C<sub>26</sub>H<sub>18</sub>ClN<sub>2</sub>O<sub>4</sub>, 457.0950; found, 457.0957.

<sup>1</sup>H NMR (400 MHz, Chloroform-*d*) δ 9.15 (d, *J* = 1.9 Hz, 1H), 9.06 (d, *J* = 7.6 Hz, 1H), 7.53 (dd, *J* = 7.6, 2.0 Hz, 1H), 7.46 (dd, *J* = 7.3, 1.7 Hz, 1H), 7.37 – 7.28 (m, 5H), 7.26 – 7.18 (m, 3H), 4.73 (d, *J* = 4.5 Hz, 2H), 2.68 (s, 3H).

<sup>13</sup>C NMR (101 MHz, Chloroform-*d*) δ 194.7, 166.1, 164.9, 158.3, 140.1, 139.7, 136.6, 136.0, 134.1, 131.6, 130.6, 130.3, 129.6, 129.5, 128.7, 128.7, 128.0, 126.7, 123.8, 118.9, 113.5, 101.6, 42.0, 26.4.

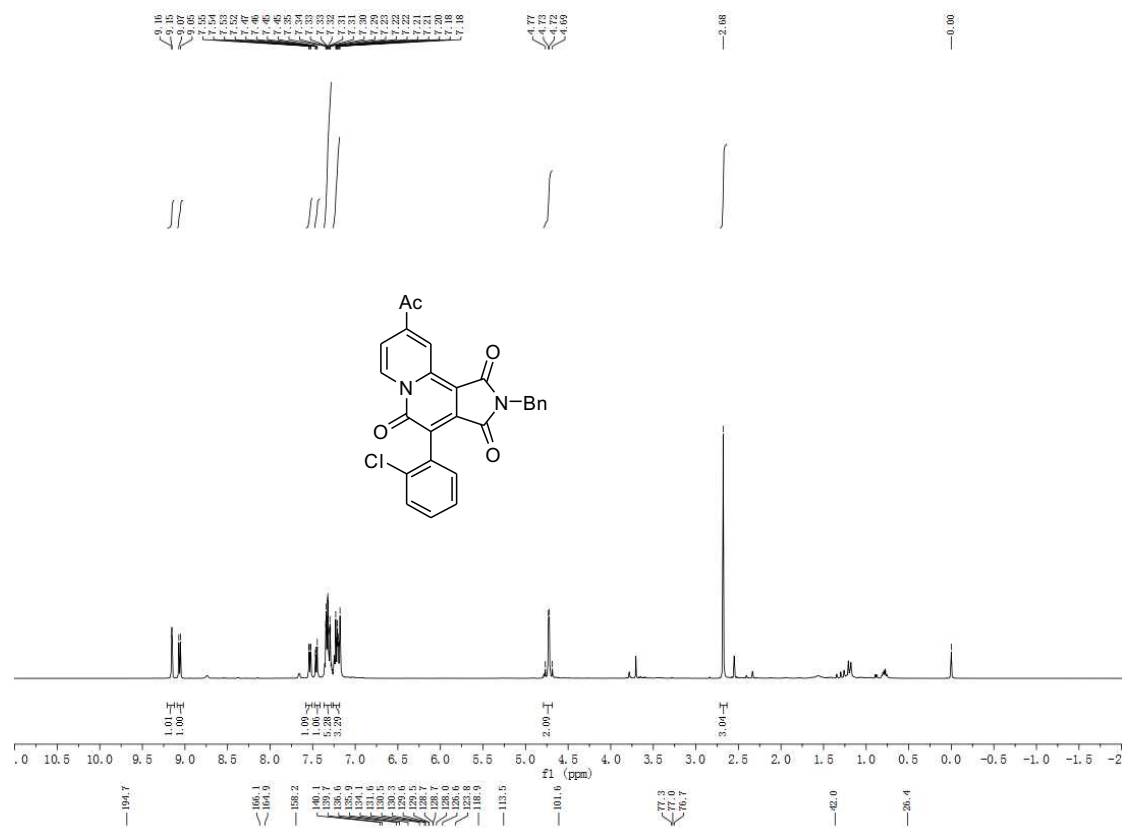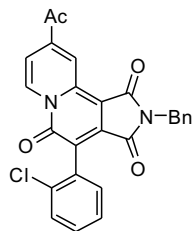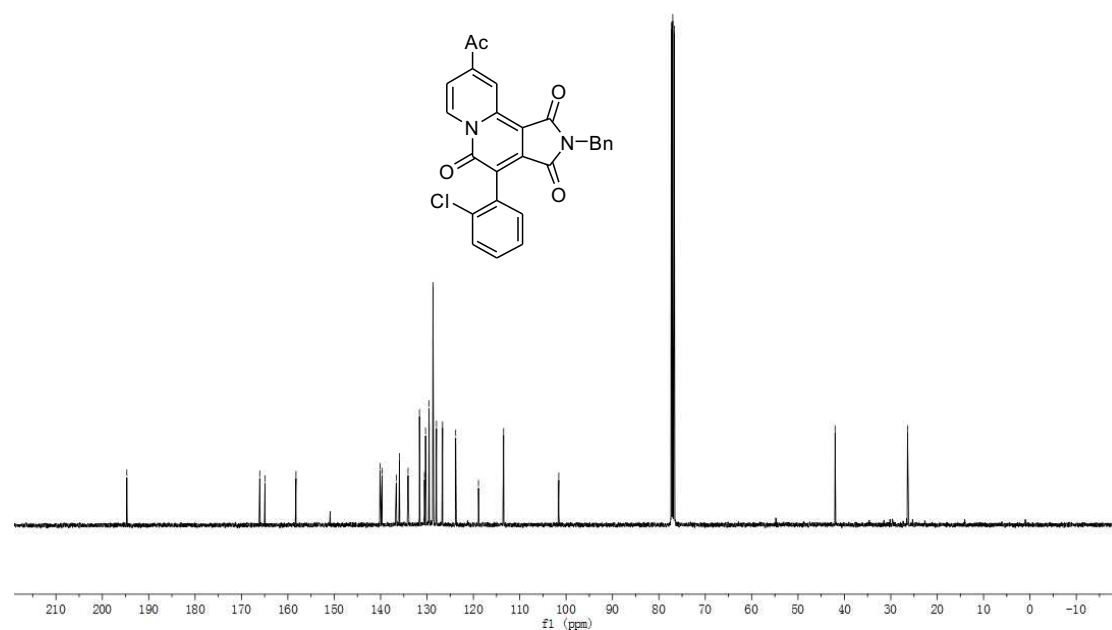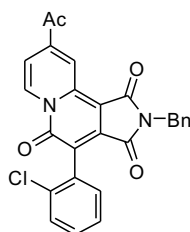

**3ja:**

**2-benzyl-4-(2-chlorophenyl)-8,10-dimethylpyrrolo[3,4-a]quinolizine-1,3,5(2H)-trione**

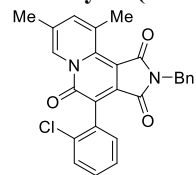

**General procedure:** 1-(1-(2-chlorophenyl)-2-methoxy-2-oxoethyl)-3,5-dimethylpyridin-1-ium bromide **1j** (0.36mmol, 133.5mg, 1.2equiv), 1-benzyl-1H-pyrrole-2,5-dione **2a** (0.3mmol, 56.2mg,

1.0equiv), 1,4-Diazabicyclo[2.2.2]octane (DABCO, 0.6mmol, 67.3mg, 2.0equiv) were added sequentially to 3.0mL of CH<sub>3</sub>CN. The mixture was stirred at 60°C for 20h in open flask. Then solvent was removed by rotary evaporator, the residual crude products was purified by column chromatography (SiO<sub>2</sub>, PE/EA=2:1, v/v; Rf=0.55) to afford compound **3ja** (yellow solid, m.p=183-185°C, 112.9mg, yield=85%).

HRMS(ESI<sup>+</sup>)m/z: [M+H]<sup>+</sup> calcd for C<sub>26</sub>H<sub>20</sub>ClN<sub>2</sub>O<sub>3</sub>, 443.1157; found, 443.1153.

<sup>1</sup>H NMR (400 MHz, Chloroform-*d*) δ 9.13 (s, 1H), 7.56 – 7.48 (m, 2H), 7.38 (ddt, *J* = 7.3, 6.3, 2.2 Hz, 5H), 7.31 – 7.22 (m, 3H), 4.81 – 4.71 (m, 2H), 3.00 (s, 3H), 2.41 (s, 3H).

<sup>13</sup>C NMR (101 MHz, Chloroform-*d*) δ 165.5, 165.3, 158.5, 141.0, 140.6, 137.7, 136.4, 134.2, 134.0, 131.7, 129.7, 129.3, 128.5, 127.6, 127.3, 126.6, 126.1, 114.4, 100.5, 41.8, 24.0, 18.3.

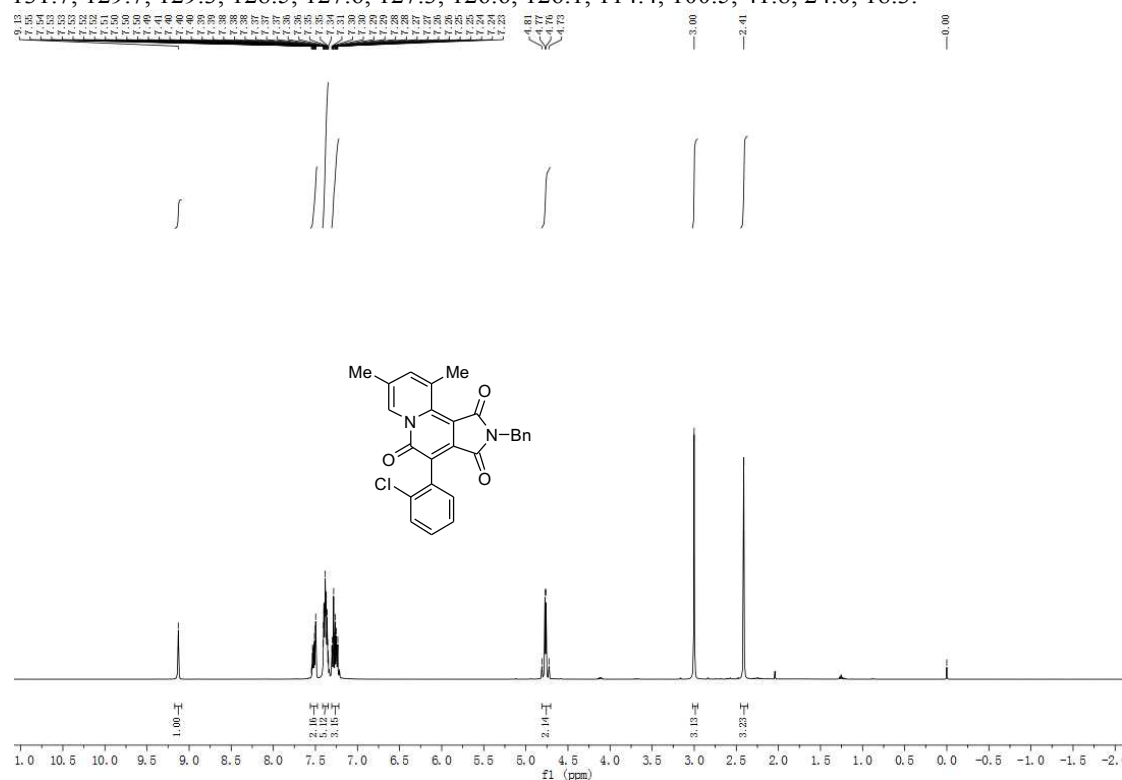

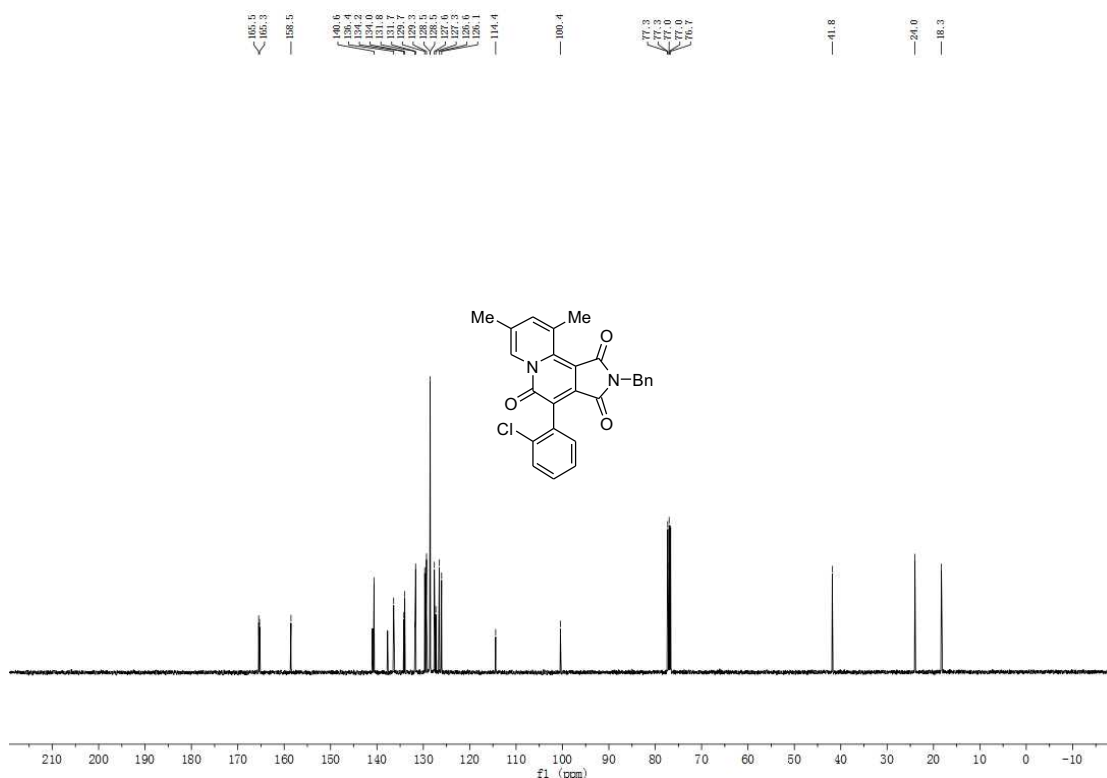

**3ka:**

**2-benzyl-4-(2-chlorophenyl)pyrrolo[3',4':3,4]pyrido[2,1-a]isoquinoline-1,3,5(2H)-trione**

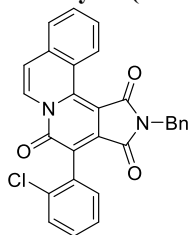

**General procedure:** 2-(1-(2-chlorophenyl)-2-methoxy-2-oxoethyl)isoquinolin-2-ium bromide **1k** (0.36mmol, 141.4mg, 1.2equiv), 1-benzyl-1H-pyrrole-2,5-dione **2a** (0.3mmol, 56.2mg, 1.0equiv), 2,2,6,6-Tetramethylpiperidoxyl (TEMPO, 0.6mmol, 93.8mg, 2.0equiv), 1,8-Diazabicyclo[5.4.0]undec-7-ene (DBU, 0.6mmol, 90.0μL, 2.0equiv) were added sequentially to 3.0mL of CH<sub>3</sub>CN. The mixture was stirred at 80°C for 15h in N<sub>2</sub> atmosphere. Then solvent was removed by rotary evaporator, the residual crude products was purified by column chromatography (SiO<sub>2</sub>, PE/EA=2:1, v/v; R<sub>f</sub>=0.5) to afford compound **3ka** (yellow solid, m.p=86-89°C, 31.2mg, yield=22%).

HRMS(ESI<sup>+</sup>)m/z: [M+H]<sup>+</sup> calcd for C<sub>28</sub>H<sub>18</sub>ClN<sub>2</sub>O<sub>3</sub>, 465.1000; found, 465.1008.

<sup>1</sup>H NMR (400 MHz, Chloroform-*d*) δ 9.96 – 9.88 (m, 1H), 9.01 (d, *J* = 7.7 Hz, 1H), 7.87 (td, *J* = 7.4, 1.2 Hz, 1H), 7.79 (t, *J* = 7.7 Hz, 2H), 7.59 – 7.52 (m, 1H), 7.49 – 7.37 (m, 6H), 7.35 – 7.26 (m, 3H), 4.95 – 4.79 (m, 2H).

<sup>13</sup>C NMR (101 MHz, Chloroform-*d*) δ 166.2, 164.7, 159.3, 143.4, 137.6, 136.1, 134.1, 133.5, 133.3, 131.7, 131.5, 131.3, 130.1, 129.5, 128.8, 128.7, 128.4, 127.9, 126.7, 126.5, 125.0, 124.0, 119.4, 117.3, 102.2, 42.4.



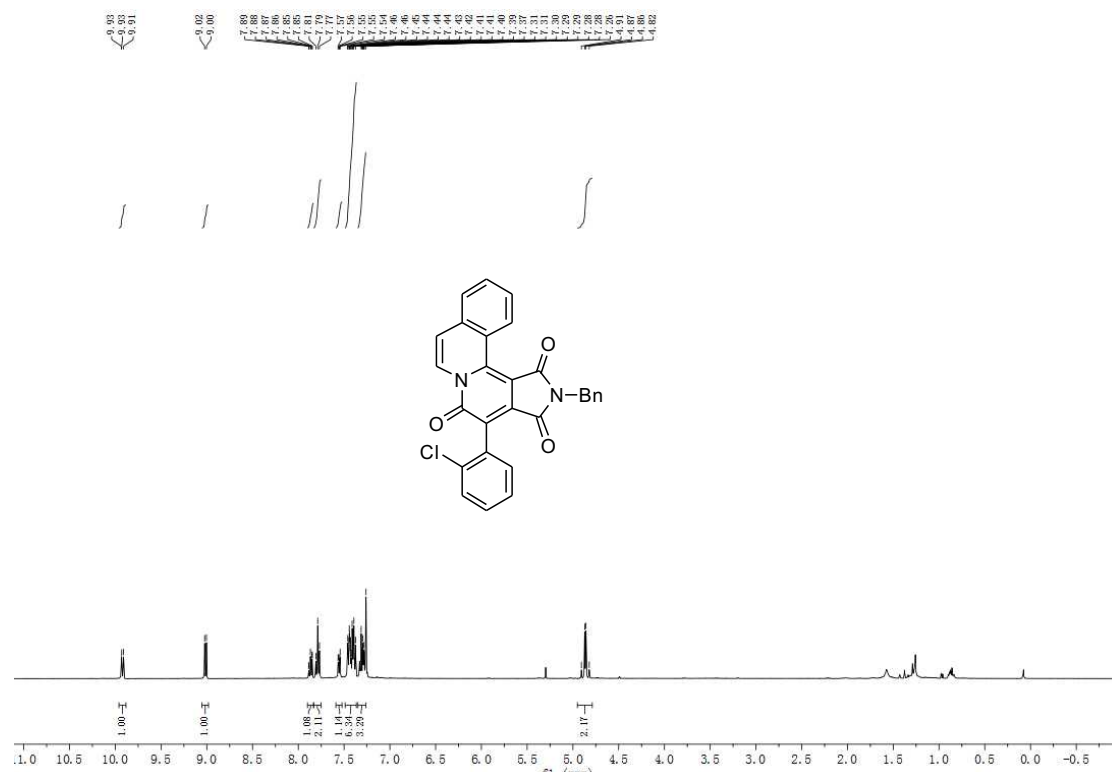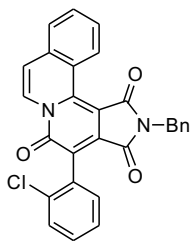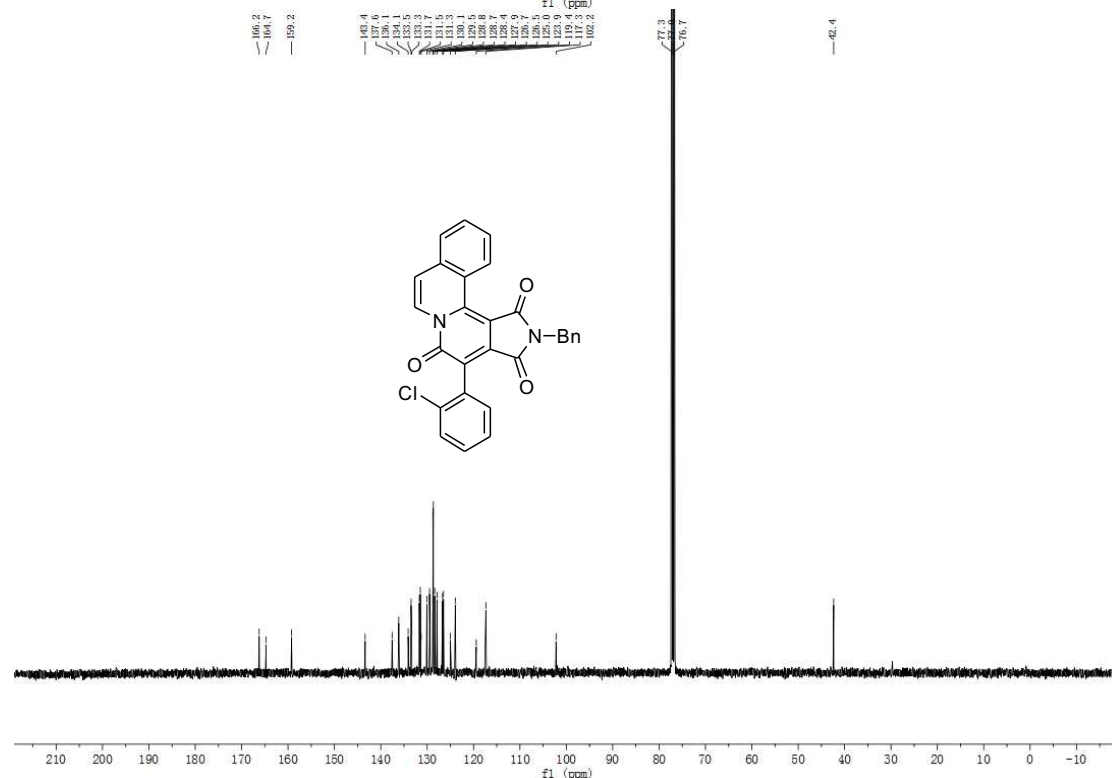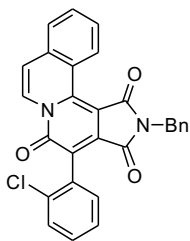

**3ab:**  
**4-(2-chlorophenyl)-2-methylpyrrolo[3,4-a]quinolizine-1,3,5(2H)-trione**

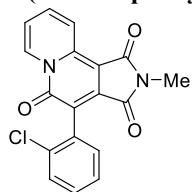

**General procedure:** 1-(1-(2-chlorophenyl)-2-methoxy-2-oxoethyl)pyridin-1-ium bromide **1a** (0.36mmol, 123.3mg, 1.2equiv), 1-methyl-1H-pyrrole-2,5-dione **2b** (0.3mmol, 34.0mg, 1.0equiv), 1,4-

Diazabicyclo[2.2.2]octane (DABCO, 0.6mmol, 67.3mg, 2.0equiv) were added sequentially to 3.0mL of 1,2-Dichloroethane. The mixture was stirred at 60°C for 20h in open flask. Then solvent was removed by rotary evaporator, the residual crude products was purified by column chromatography (SiO<sub>2</sub>, PE/EA=1:1, v/v; Rf=0.45) to afford compound **3ab** (yellow solid, m.p=183-186°C, 85.8mg, yield=84%). HRMS(ESI<sup>+</sup>)m/z: [M+H]<sup>+</sup> calcd for C<sub>18</sub>H<sub>12</sub>ClN<sub>2</sub>O<sub>3</sub>, 339.0531; found, 339.0525.

<sup>1</sup>H NMR (400 MHz, DMSO-*d*<sub>6</sub>) δ 9.12 (d, *J* = 7.2 Hz, 1H), 8.64 (ddd, *J* = 8.9, 1.5, 0.9 Hz, 1H), 8.07 (ddd, *J* = 8.9, 6.8, 1.3 Hz, 1H), 7.58 – 7.39 (m, 5H), 2.98 (s, 3H).

<sup>13</sup>C NMR (101 MHz, DMSO-*d*<sub>6</sub>) δ 166.3, 165.6, 157.8, 139.7, 136.8, 136.7, 133.5, 132.5, 131.8, 129.9, 129.0, 128.8, 126.6, 121.8, 118.2, 113.8, 98.5, 23.8.

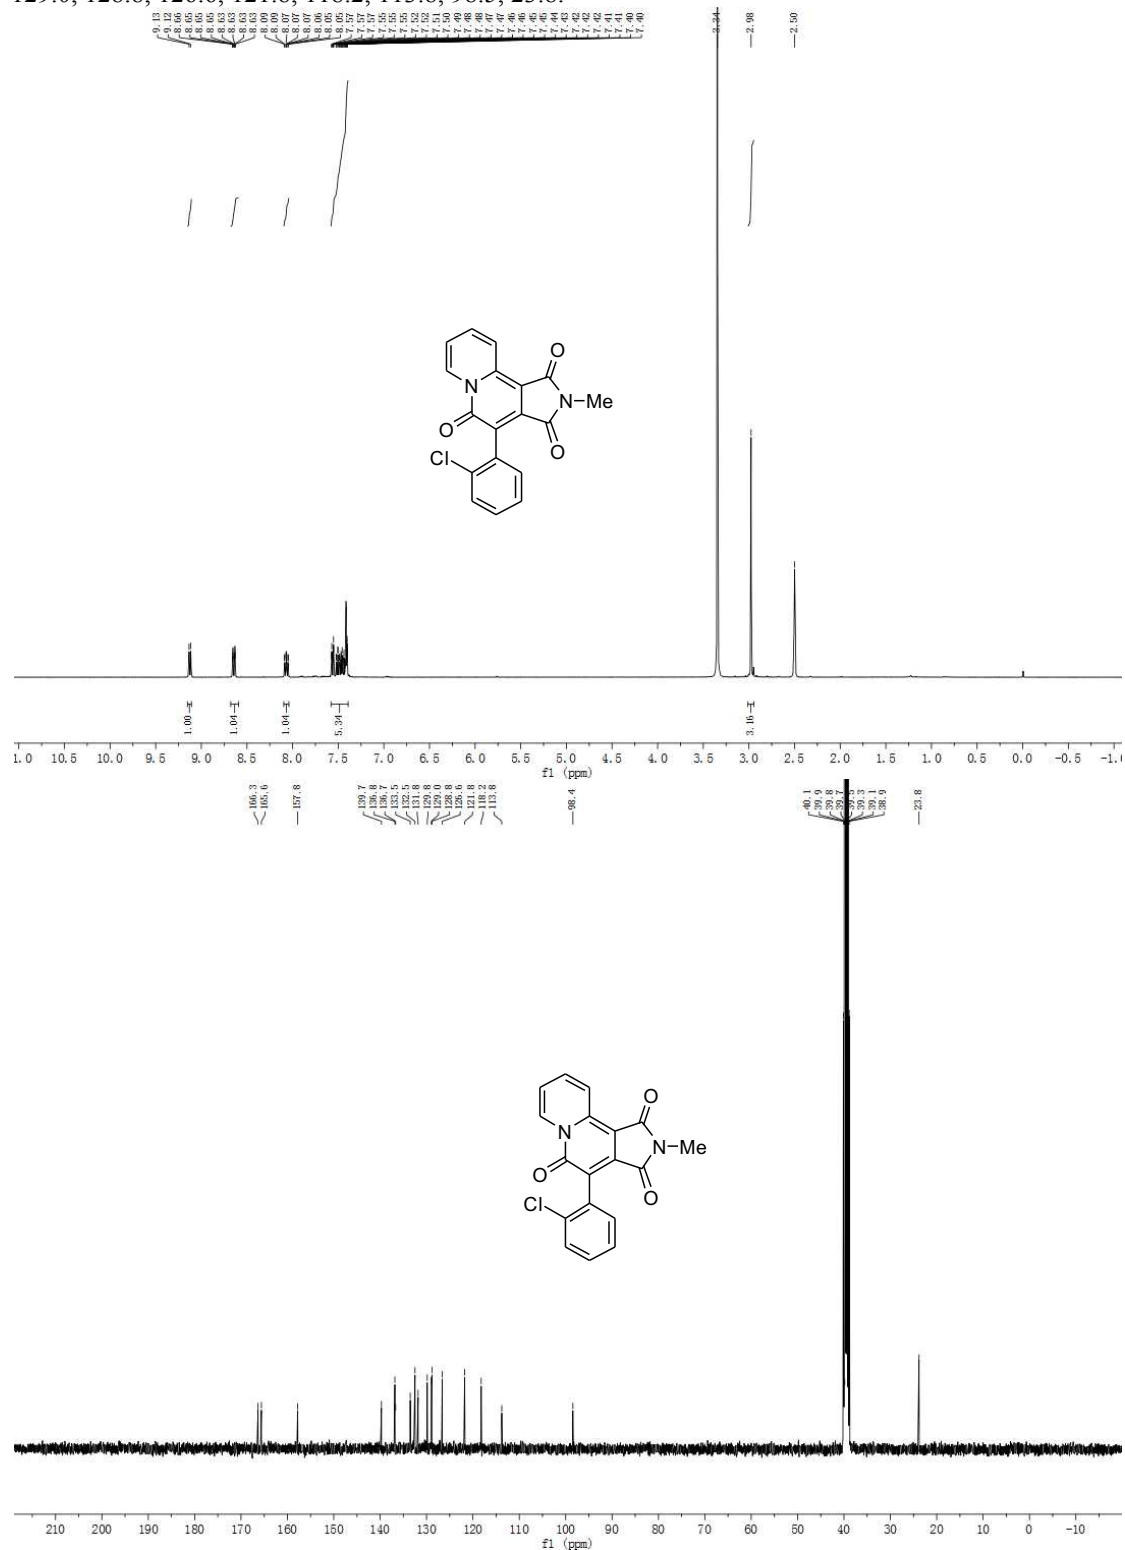

**3ac:**

**4-(2-chlorophenyl)-2-ethylpyrrolo[3,4-a]quinolizine-1,3,5(2H)-trione**

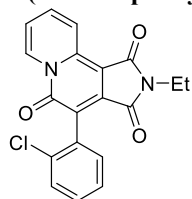

**General procedure:** 1-(1-(2-chlorophenyl)-2-methoxy-2-oxoethyl)pyridin-1-ium bromide **1a** (0.36mmol, 123.3mg, 1.2equiv), 1-ethyl-1H-pyrrole-2,5-dione **2c** (0.3mmol, 37.6mg, 1.0equiv), 1,4-Diazabicyclo[2.2.2]octane (DABCO, 0.6mmol, 67.3mg, 2.0equiv) were added sequentially to 3.0mL of 1,2-Dichloroethane. The mixture was stirred at 60°C for 20h in open flask. Then solvent was removed by rotary evaporator, the residual crude products was purified by column chromatography (SiO<sub>2</sub>, PE/EA=1:1, v/v; R<sub>f</sub>=0.6) to afford compound **3ac** (yellow solid, m.p=161-163°C, 97.8mg, yield=92%). HRMS(ESI<sup>+</sup>)m/z: [M+H]<sup>+</sup> calcd for C<sub>19</sub>H<sub>14</sub>ClN<sub>2</sub>O<sub>3</sub>, 353.0687; found, 353.0676.

<sup>1</sup>H NMR (400 MHz, DMSO-*d*<sub>6</sub>) δ 9.11 (dt, *J* = 7.2, 1.1 Hz, 1H), 8.62 (dt, *J* = 8.7, 1.2 Hz, 1H), 8.05 (ddd, *J* = 8.9, 6.8, 1.3 Hz, 1H), 7.56 (dt, *J* = 7.8, 1.0 Hz, 1H), 7.51 – 7.37 (m, 4H), 3.53 (q, *J* = 7.1 Hz, 2H), 1.12 (t, *J* = 7.2 Hz, 3H).

<sup>13</sup>C NMR (101 MHz, DMSO-*d*<sub>6</sub>) δ 166.0, 165.3, 157.8, 139.8, 136.8, 136.5, 133.5, 132.5, 131.8, 129.8, 129.0, 128.8, 126.6, 121.7, 118.2, 113.7, 98.2, 32.4, 13.5.

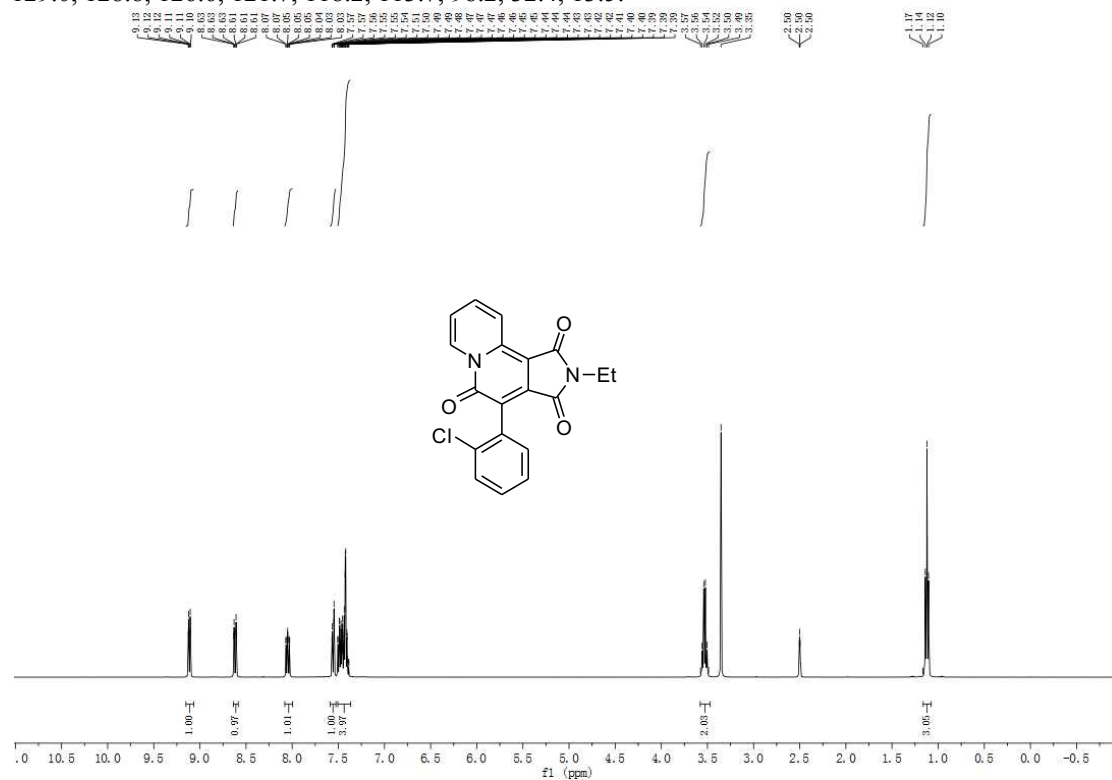

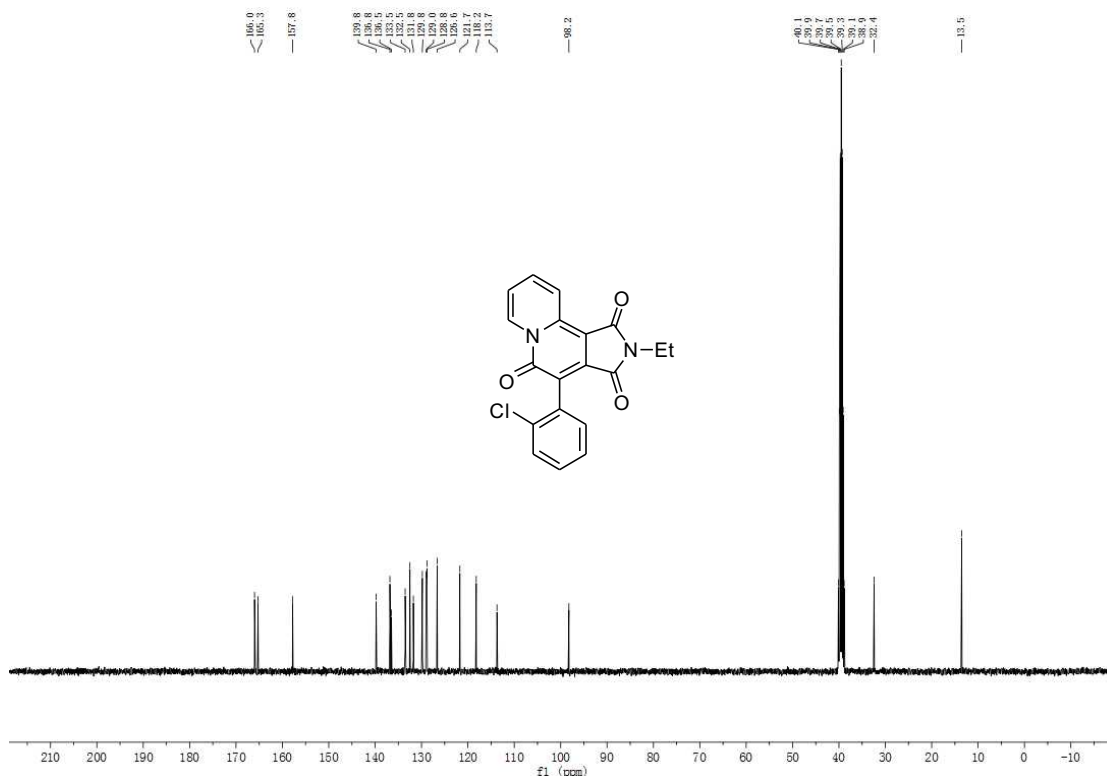

**3ad:**

**4-(2-chlorophenyl)-2-dodecylpyrrolo[3,4-a]quinolizine-1,3,5(2H)-trione**

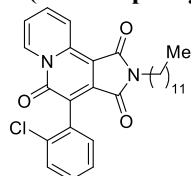

**General procedure:** 1-(1-(2-chlorophenyl)-2-methoxy-2-oxoethyl)pyridin-1-ium bromide **1a** (0.36mmol, 123.3mg, 1.2equiv), 1-dodecyl-1H-pyrrole-2,5-dione **2d** (0.3mmol, 79.6mg, 1.0equiv), 1,4-Diazabicyclo[2.2.2]octane (DABCO, 0.6mmol, 67.3mg, 2.0equiv) were added sequentially to 3.0mL of 1,2-Dichloroethane. The mixture was stirred at 60°C for 20h in open flask. Then solvent was removed by rotary evaporator, the residual crude products was purified by column chromatography (SiO<sub>2</sub>, PE/EA=2:1, v/v; Rf=0.5) to afford compound **3ad** (yellow oil, 98.9mg, yield=67%).

HRMS(ESI<sup>+</sup>)m/z: [M+H]<sup>+</sup> calcd for C<sub>29</sub>H<sub>34</sub>ClN<sub>2</sub>O<sub>3</sub>, 493.2252; found, 493.2248.

<sup>1</sup>H NMR (400 MHz, Chloroform-*d*) δ 9.21 (d, *J* = 7.3 Hz, 1H), 8.82 – 8.78 (m, 1H), 7.78 (ddd, *J* = 8.6, 6.7, 1.4 Hz, 1H), 7.58 – 7.50 (m, 1H), 7.43 – 7.38 (m, 3H), 7.28 – 7.24 (m, 1H), 3.61 (t, *J* = 7.4 Hz, 2H), 1.64 (p, *J* = 7.2 Hz, 2H), 1.29 – 1.22 (m, 18H), 0.87 (t, *J* = 6.8 Hz, 3H).

<sup>13</sup>C NMR (101 MHz, Chloroform-*d*) δ 166.8, 165.8, 158.5, 140.2, 137.0, 135.0, 134.3, 131.8, 131.1, 130.0, 129.5, 129.1, 126.6, 122.8, 117.1, 115.5, 99.2, 38.3, 31.9, 29.6, 29.5, 29.4, 29.3, 29.1, 28.4, 26.9, 22.7, 14.1.

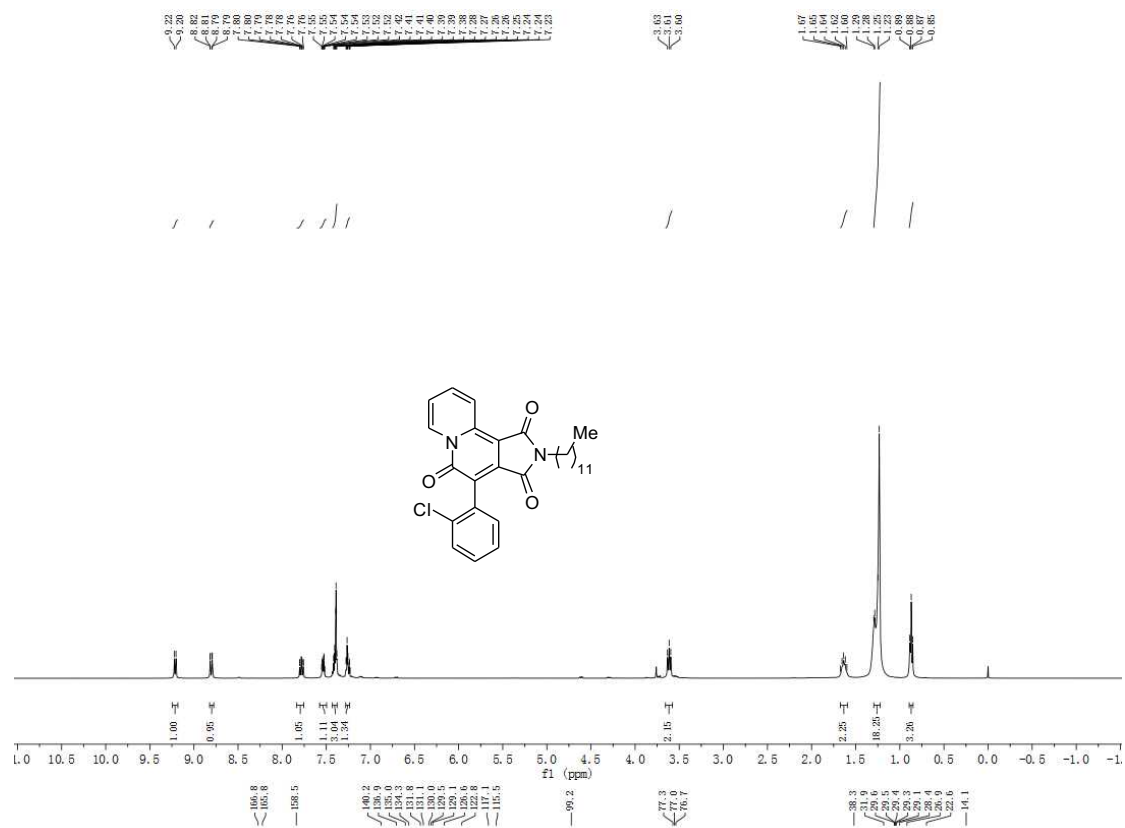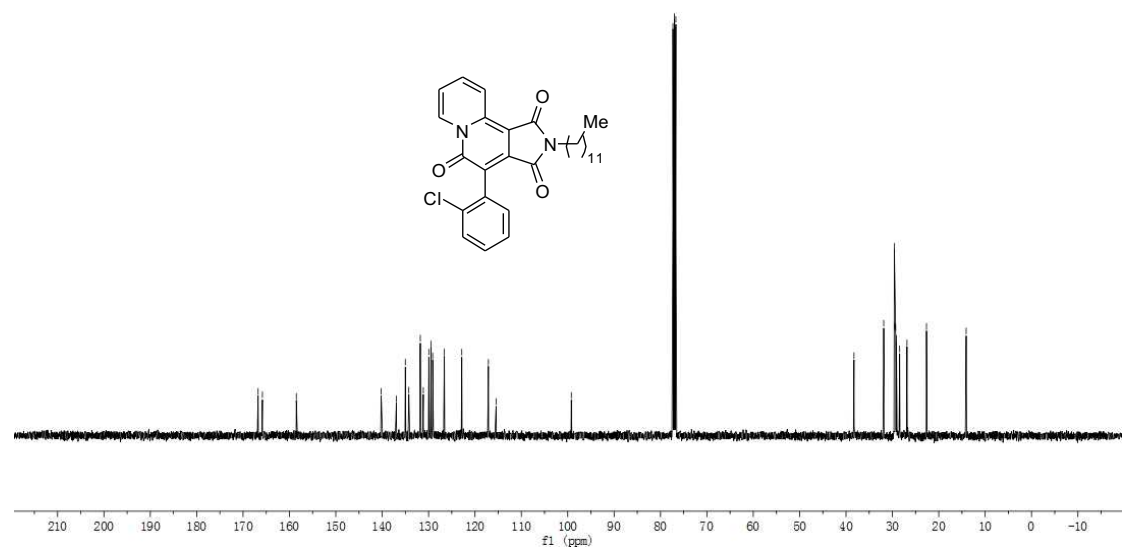

**3ae:**  
**4-(2-chlorophenyl)-2-cyclohexylpyrro[3,4-a]quinolizine-1,3,5(2H)-trione**

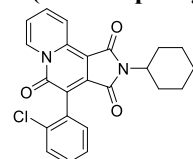

**General procedure:** 1-(1-(2-chlorophenyl)-2-methoxy-2-oxoethyl)pyridin-1-ium bromide **1a** (0.36mmol, 123.3mg, 1.2equiv), 1-cyclohexyl-1H-pyrrole-2,5-dione **2e** (0.3mmol, 54.0mg, 1.0equiv), 1,4-Diazabicyclo[2.2.2]octane (DABCO, 0.6mmol, 67.3mg, 2.0equiv) were added sequentially to 3.0mL

of 1,2-Dichloroethane. The mixture was stirred at 60°C for 20h in open flask. Then solvent was removed by rotary evaporator, the residual crude products was purified by column chromatography (SiO<sub>2</sub>, PE/EA=1:1, v/v; Rf=0.8) to afford compound **3ae** (yellow solid, m.p=89-91°C, 95.2mg, yield=78%).

HRMS(ESI<sup>+</sup>)m/z: [M+H]<sup>+</sup> calcd for C<sub>23</sub>H<sub>20</sub>ClN<sub>2</sub>O<sub>3</sub>, 407.1157; found, 407.1149.

<sup>1</sup>H NMR (400 MHz, Chloroform-*d*) δ 9.21 (dt, *J* = 7.3, 1.1 Hz, 1H), 8.81 (dt, *J* = 9.0, 1.2 Hz, 1H), 7.78 (ddd, *J* = 8.9, 6.7, 1.3 Hz, 1H), 7.59 – 7.51 (m, 1H), 7.43 – 7.33 (m, 3H), 7.28 – 7.23 (m, 1H), 4.07 (tt, *J* = 12.3, 3.9 Hz, 1H), 2.17 (tdd, *J* = 15.8, 11.1, 3.1 Hz, 2H), 1.86 – 1.79 (m, 2H), 1.73 – 1.63 (m, 3H), 1.34 – 1.20 (m, 3H).

<sup>13</sup>C NMR (101 MHz, Chloroform-*d*) δ 166.8, 165.8, 158.5, 140.2, 136.8, 135.0, 134.3, 131.8, 131.2, 129.9, 129.5, 129.1, 126.6, 122.8, 117.1, 115.3, 99.2, 51.1, 29.7, 29.6, 26.0, 25.1.

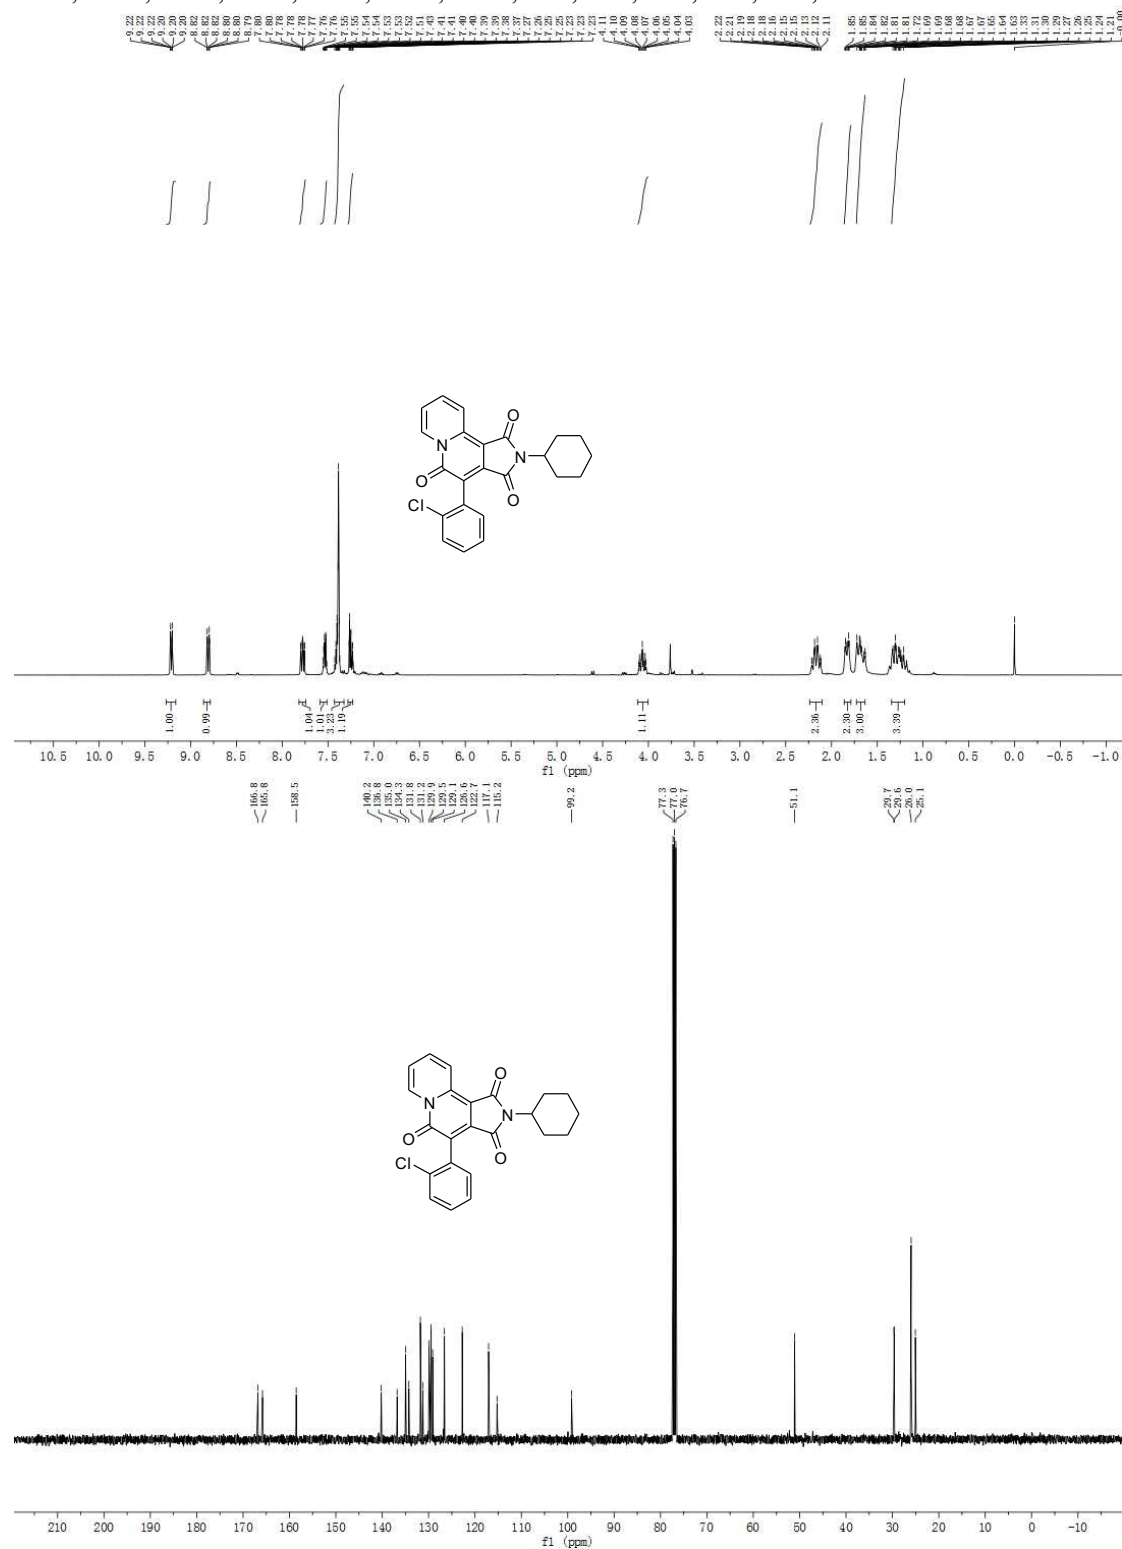

**3af:**

**2-(tert-butyl)-4-(2-chlorophenyl)pyrrolo[3,4-a]quinolizine-1,3,5(2H)-trione**

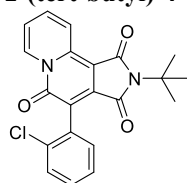

**General procedure:** 1-(1-(2-chlorophenyl)-2-methoxy-2-oxoethyl)pyridin-1-ium bromide **1a** (0.36mmol, 123.3mg, 1.2equiv), 1-(tert-butyl)-1H-pyrrole-2,5-dione **2f** (0.3mmol, 44.0μL, 1.0equiv), 1,4-Diazabicyclo[2.2.2]octane (DABCO, 0.6mmol, 67.3mg, 2.0equiv) were added sequentially to 3.0mL of 1,2-Dichloroethane. The mixture was stirred at 60°C for 20h in open flask. Then solvent was removed by rotary evaporator, the residual crude products was purified by column chromatography (SiO<sub>2</sub>, PE/EA=1:1, v/v; Rf=0.8) to afford compound **3af** (yellow solid, m.p=166-168°C, 99.1mg, yield=87%).

HRMS(ESI<sup>+</sup>)m/z: [M+H]<sup>+</sup> calcd for C<sub>21</sub>H<sub>18</sub>ClN<sub>2</sub>O<sub>3</sub>, 381.1000; found, 381.0994.

<sup>1</sup>H NMR (400 MHz, DMSO-*d*<sub>6</sub>) δ 9.14 (dt, *J* = 7.3, 1.2 Hz, 1H), 8.69 (ddd, *J* = 8.9, 1.4, 0.9 Hz, 1H), 8.05 (ddd, *J* = 8.9, 6.8, 1.3 Hz, 1H), 7.56 – 7.39 (m, 5H), 1.57 (s, 9H).

<sup>13</sup>C NMR (101 MHz, DMSO-*d*<sub>6</sub>) δ 167.6, 166.3, 157.8, 139.6, 136.8, 136.1, 133.5, 132.4, 132.0, 129.6, 129.1, 128.8, 126.6, 121.8, 118.3, 112.6, 98.3, 57.3, 28.6.

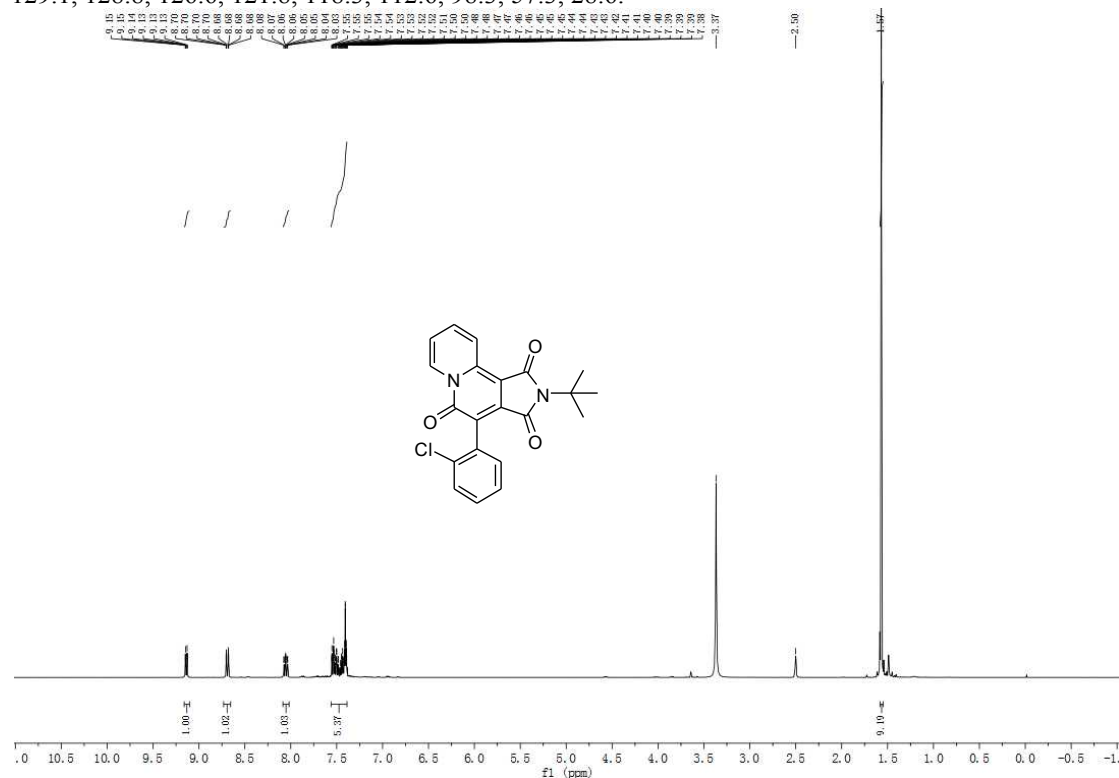

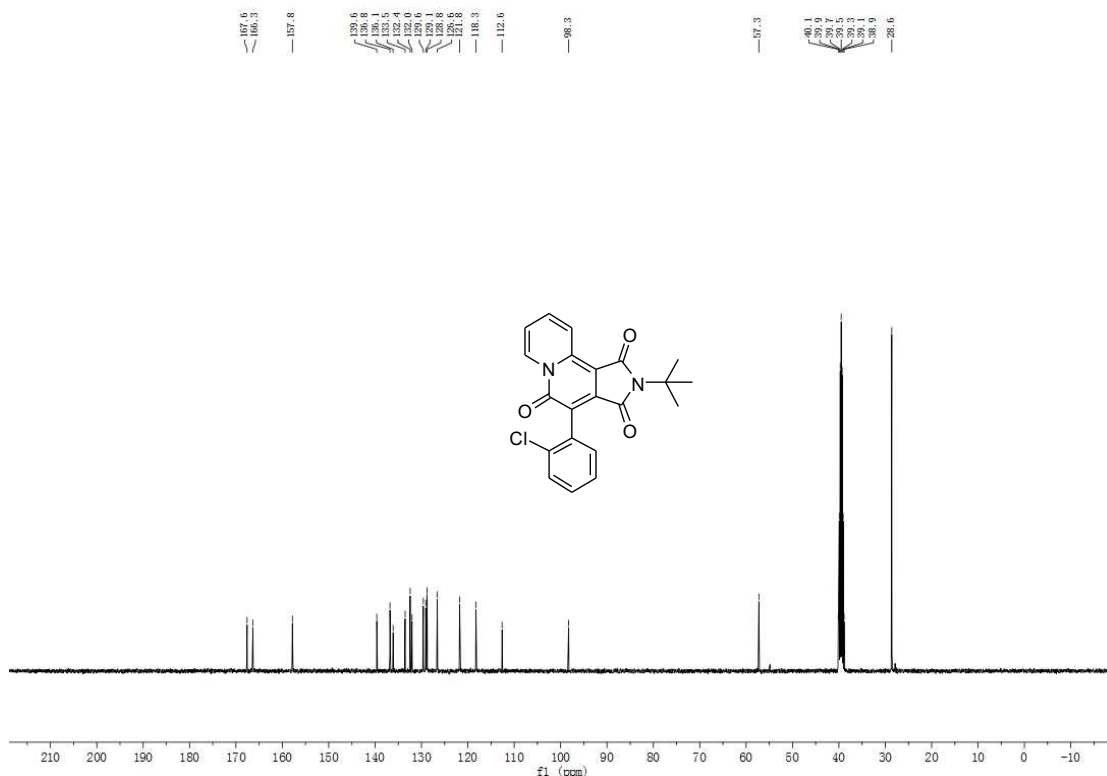

**3ag:**

**4-(2-chlorophenyl)-2-phenylpyrrolo[3,4-a]quinolizine-1,3,5(2H)-trione**

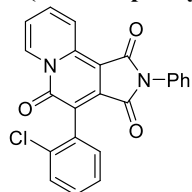

**General procedure:** 1-(1-(2-chlorophenyl)-2-methoxy-2-oxoethyl)pyridin-1-ium bromide **1a** (0.36mmol, 123.3mg, 1.2equiv), 1-phenyl-1H-pyrrole-2,5-dione **2g** (0.3mmol, 51.9mg, 1.0equiv), 1,4-Diazabicyclo[2.2.2]octane (DABCO, 0.6mmol, 67.3mg, 2.0equiv) were added sequentially to 3.0mL of 1,2-Dichloroethane. The mixture was stirred at 60°C for 20h in open flask. Then solvent was removed by rotary evaporator, the residual crude products was purified by column chromatography (SiO<sub>2</sub>, PE/EA=1:1, v/v; R<sub>f</sub>=0.45) to afford compound **3ag** (yellow solid, m.p=188-191°C, 99.5mg, yield=83%).

HRMS(ESI<sup>+</sup>)m/z: [M+H]<sup>+</sup> calcd for C<sub>23</sub>H<sub>14</sub>ClN<sub>2</sub>O<sub>3</sub>, 401.0687; found, 401.0679.

<sup>1</sup>H NMR (400 MHz, DMSO-*d*<sub>6</sub>) δ 9.21 (dt, *J* = 7.3, 1.2 Hz, 1H), 8.72 (dt, *J* = 8.9, 1.2 Hz, 1H), 8.13 (ddd, *J* = 8.6, 6.8, 1.3 Hz, 1H), 7.60 – 7.37 (m, 10H).

<sup>13</sup>C NMR (101 MHz, DMSO-*d*<sub>6</sub>) δ 165.3, 164.6, 157.8, 140.2, 137.3, 136.3, 133.6, 132.6, 131.8, 131.7, 129.9, 129.3, 128.9, 128.8, 128.0, 127.2, 126.6, 122.0, 118.6, 113.8, 98.1.



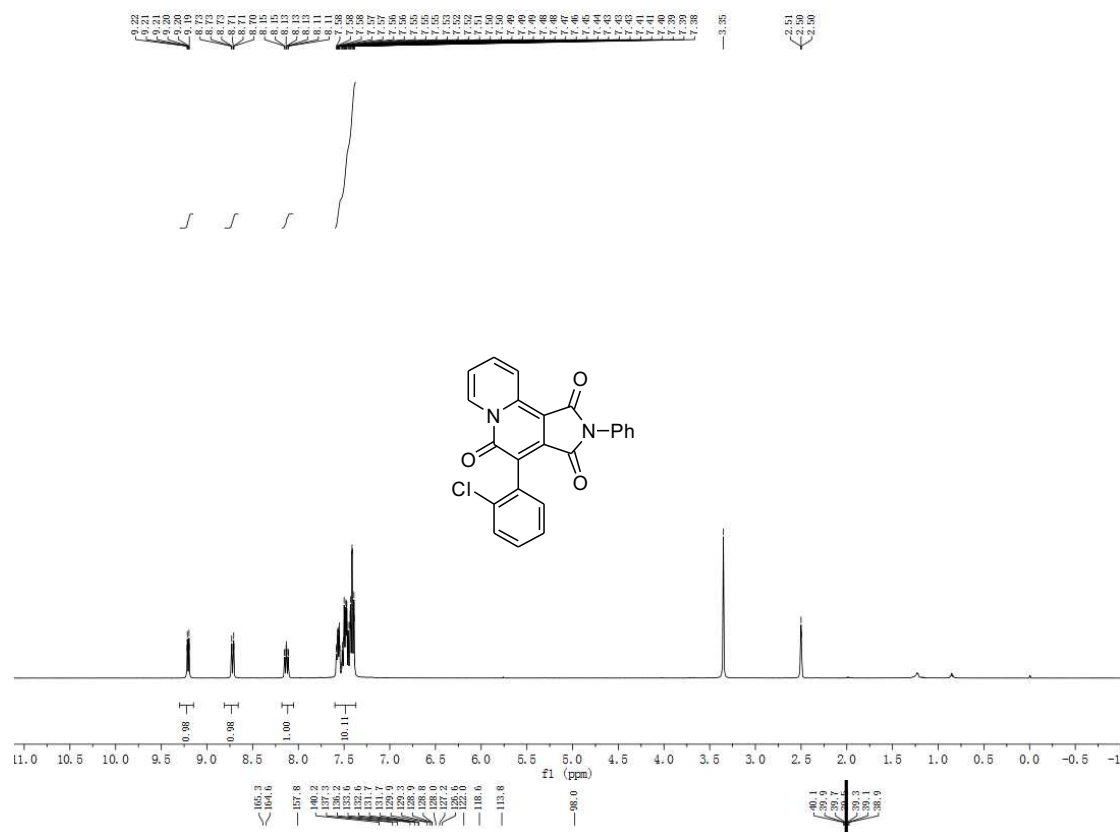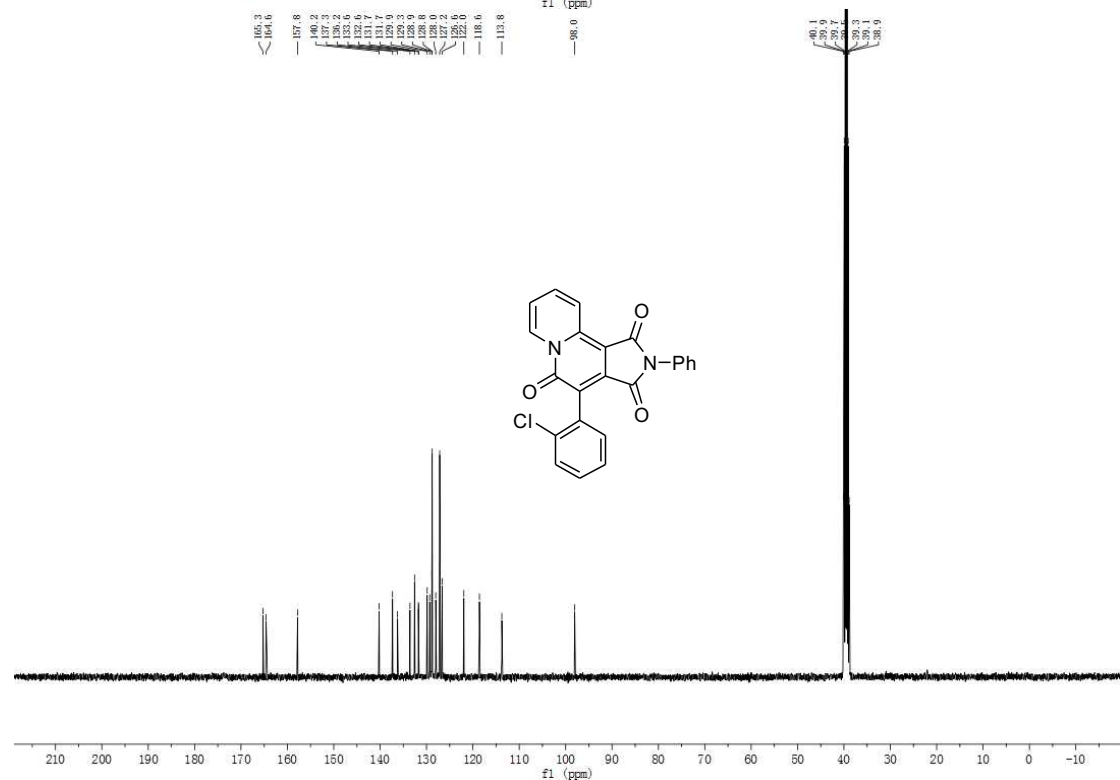

**3ah:**  
**4-(2-chlorophenyl)-2-(4-hydroxyphenyl)pyrrolo[3,4-a]quinolizine-1,3,5(2H)-trione**

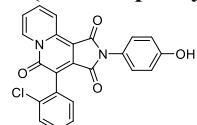

**General procedure:** 1-(1-(2-chlorophenyl)-2-methoxy-2-oxoethyl)pyridin-1-ium bromide **1a** (0.36mmol, 123.3mg, 1.2equiv), 1-(4-hydroxyphenyl)-1H-pyrrole-2,5-dione **2h** (0.3mmol, 56.7mg, 1.0equiv), 1,4-Diazabicyclo[2.2.2]octane (DABCO, 0.6mmol, 67.3mg, 2.0equiv) were added sequentially to 3.0mL of CH<sub>3</sub>CN. The mixture was stirred at 60°C for 20h in open flask. Then solvent

was removed by rotary evaporator, the residual crude products was purified by column chromatography (SiO<sub>2</sub>, PE/EA=1:1, v/v; Rf=0.3) to afford compound **3ah** (yellow solid, m.p=310-313°C, 113.0mg, yield=90%).

HRMS(ESI<sup>+</sup>)m/z: [M+H]<sup>+</sup> calcd for C<sub>23</sub>H<sub>14</sub>ClN<sub>2</sub>O<sub>4</sub>, 417.0637; found, 417.0642.

<sup>1</sup>H NMR (400 MHz, DMSO-*d*<sub>6</sub>) δ 9.75 (s, 1H), 9.18 (d, *J* = 7.3 Hz, 1H), 8.70 (d, *J* = 8.8 Hz, 1H), 8.10 (t, *J* = 7.8 Hz, 1H), 7.62 – 7.48 (m, 2H), 7.48 – 7.37 (m, 3H), 7.16 (d, *J* = 8.3 Hz, 2H), 6.84 (d, *J* = 8.3 Hz, 2H).

<sup>13</sup>C NMR (101 MHz, DMSO-*d*<sub>6</sub>) δ 165.6, 164.8, 157.8, 157.1, 140.1, 137.1, 136.3, 133.5, 132.5, 131.8, 129.8, 129.2, 128.8, 128.5, 126.6, 122.6, 121.9, 118.4, 115.3, 113.7, 98.1.

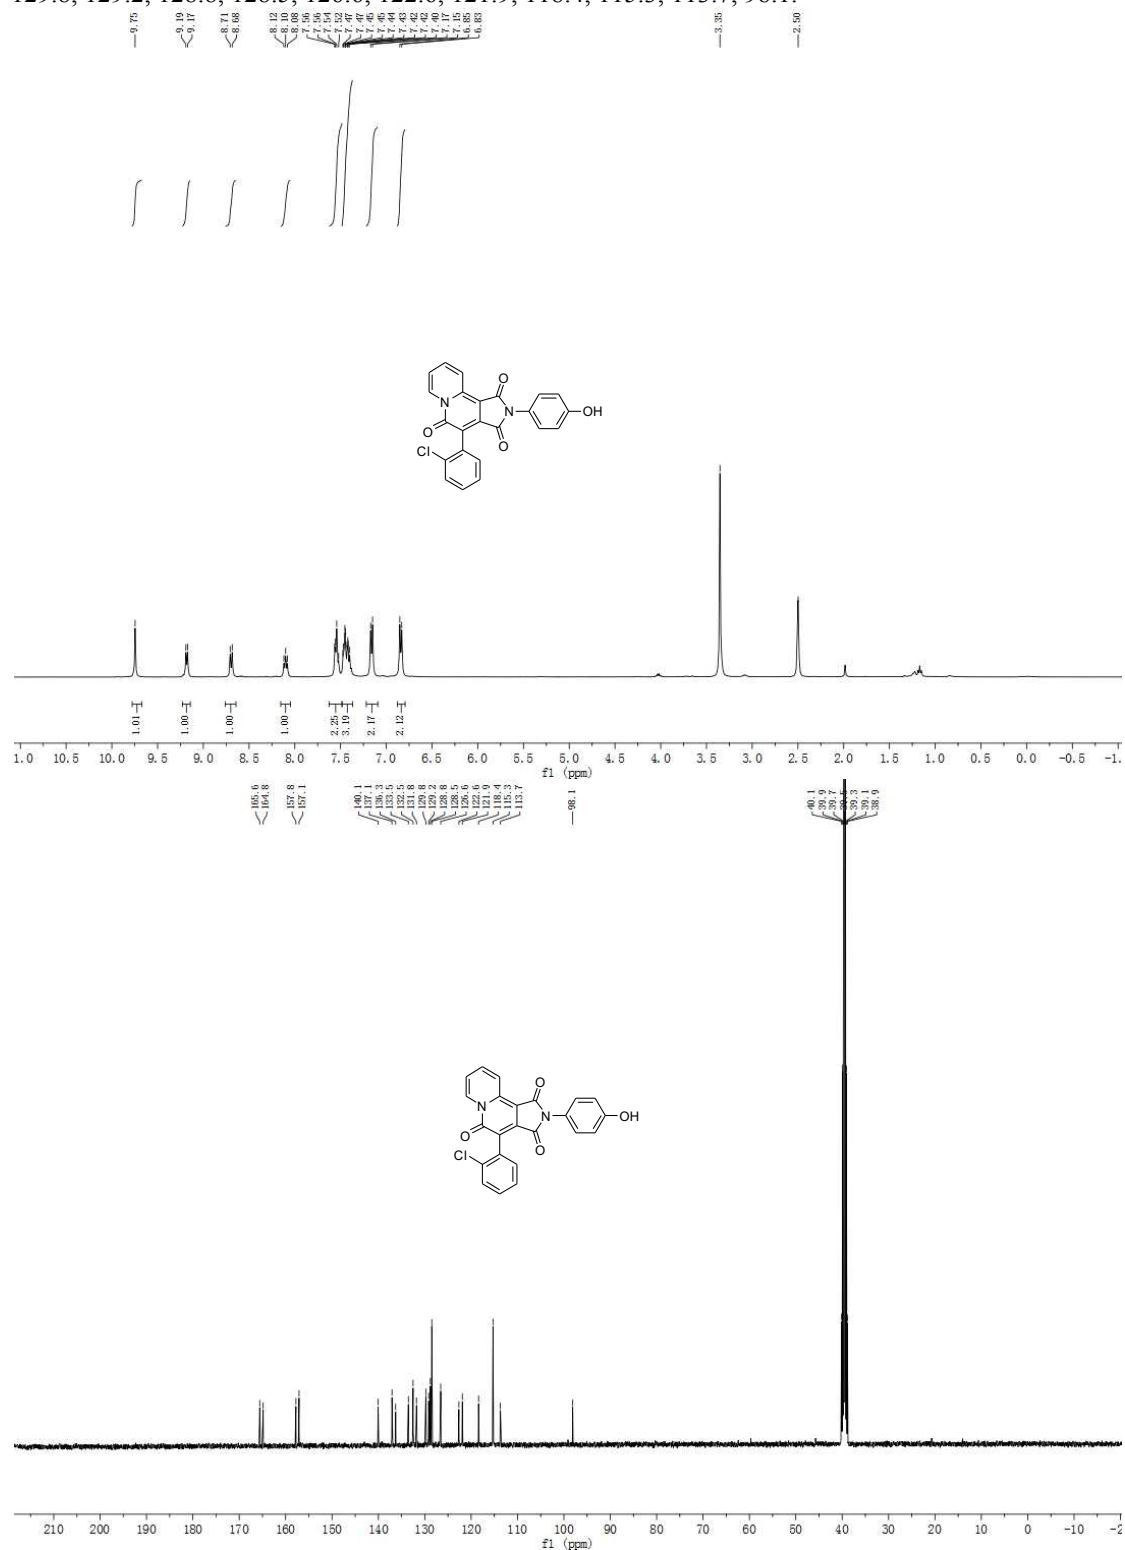

**3ai:**

**4-(2-chlorophenyl)pyrrolo[3,4-a]quinolizine-1,3,5(2H)-trione**

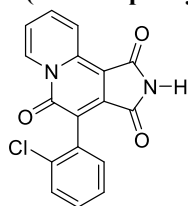

**General procedure:** 1-(1-(2-chlorophenyl)-2-methoxy-2-oxoethyl)pyridin-1-ium bromide **1a** (0.36mmol, 123.3mg, 1.2equiv), 1H-pyrrole-2,5-dione **2i** (0.3mmol, 29.1mg, 1.0equiv), 1,4-Diazabicyclo[2.2.2]octane (DABCO, 0.6mmol, 67.3mg, 2.0equiv) were added sequentially to 3.0mL of CH<sub>3</sub>CN. The mixture was stirred at 60°C for 20h in open flask. Then solvent was removed by rotary evaporator, the residual crude products was purified by column chromatography (SiO<sub>2</sub>, PE/EA=1:1, v/v; Rf=0.4) to afford compound **3ai** (yellow solid, m.p.=288-290°C, 68.5mg, yield=70%).

HRMS(ESI<sup>+</sup>)m/z: [M+H]<sup>+</sup> calcd for C<sub>17</sub>H<sub>10</sub>ClN<sub>2</sub>O<sub>3</sub>, 325.0374; found, 415.325.0378.

<sup>1</sup>H NMR (400 MHz, DMSO-*d*<sub>6</sub>) δ 11.32 (s, 1H), 9.12 (d, *J* = 7.1 Hz, 1H), 8.62 (d, *J* = 8.4 Hz, 1H), 8.03 (ddd, *J* = 8.5, 6.8, 1.3 Hz, 1H), 7.58 – 7.39 (m, 5H).

<sup>13</sup>C NMR (101 MHz, DMSO-*d*<sub>6</sub>) δ 167.5, 166.9, 157.9, 139.8, 137.4, 136.7, 133.6, 132.5, 131.9, 129.7, 129.0, 128.8, 126.6, 121.9, 118.3, 113.2, 99.3.

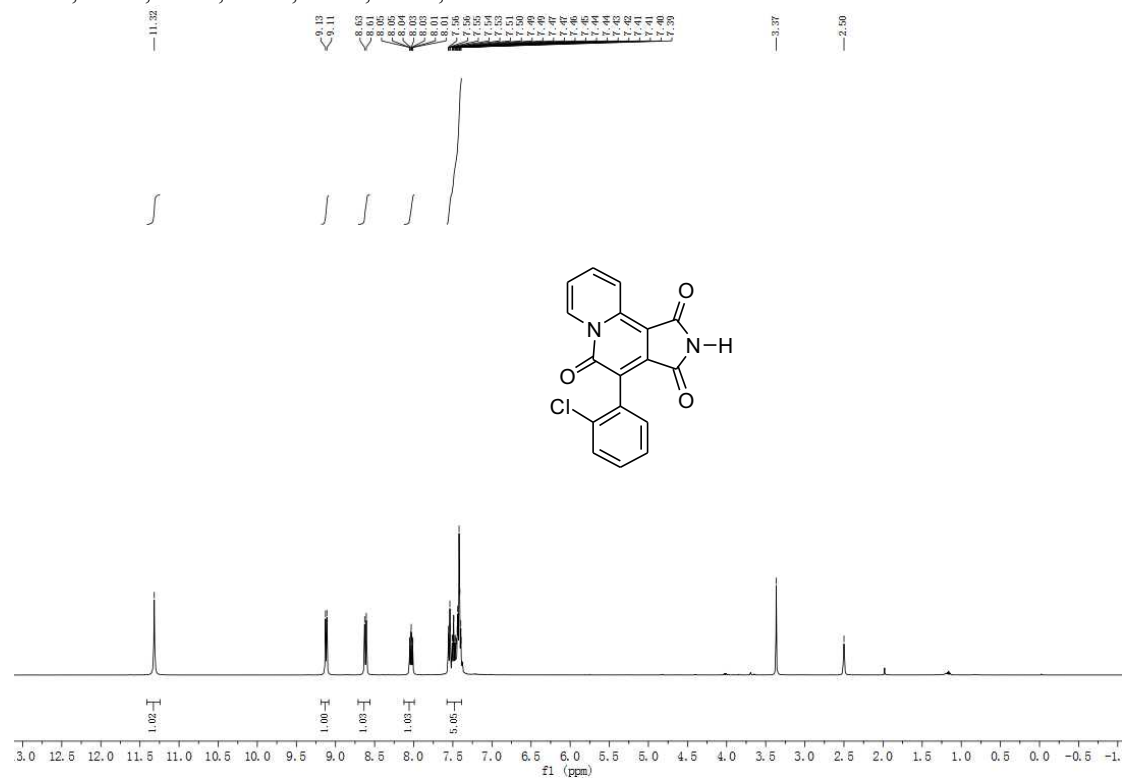

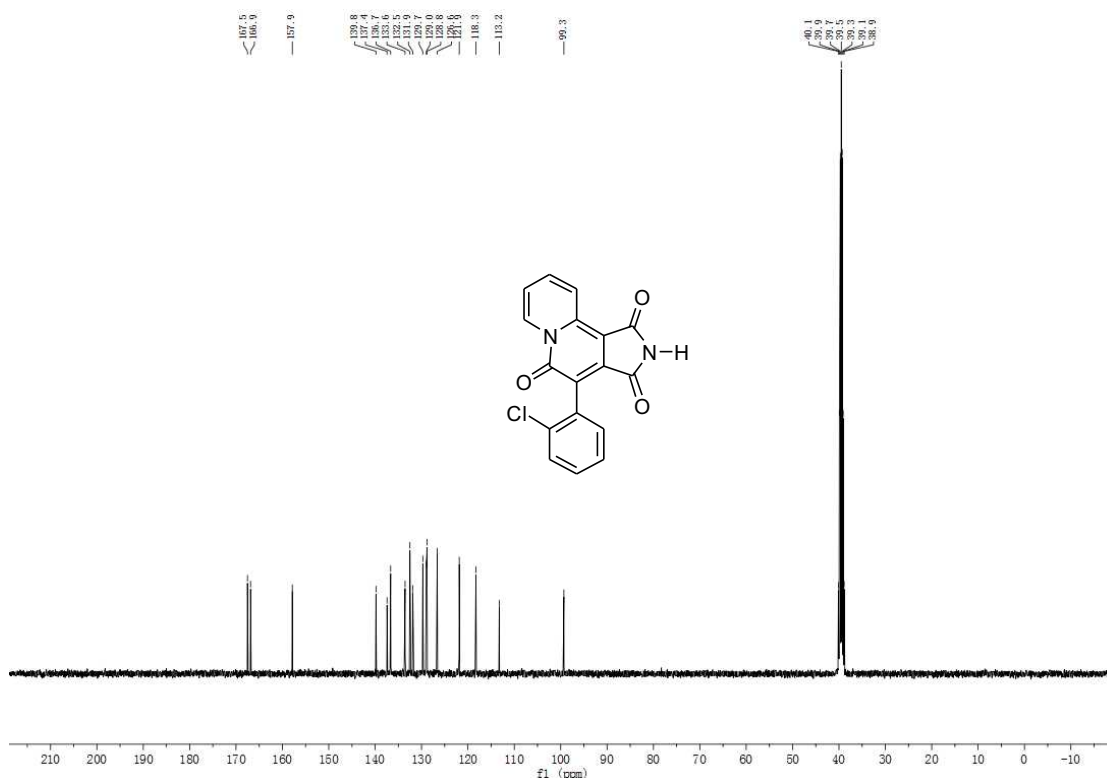

### 3aj:

#### 3-(2-chlorophenyl)-N,N-dimethyl-4-oxo-4H-quinolizine-1-carboxamide

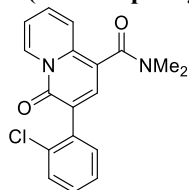

**General procedure:** 1-(1-(2-chlorophenyl)-2-methoxy-2-oxoethyl)pyridin-1-ium bromide **1a** (0.3mmol, 102.8mg, 1.0equiv), N,N-dimethylacrylamide **2j** (0.6mmol, 61.8μL, 2.0equiv), 2,2,6,6-Tetramethylpiperidoxyl (TEMPO, 0.75mmol, 117.2mg, 2.5equiv), 1,8-Diazabicyclo[5.4.0]undec-7-ene (DBU, 0.9mmol, 134.4μL, 3.0equiv) were added sequentially to 3.0mL of DMSO. The mixture was stirred at 120°C for 40h in open flask. After the reaction liquid was cooled to room temperature, 100ml of water was added and extracted by 50ml of ethyl acetate for three times. The organic phase was isolated and ethyl acetate was removed by rotary evaporator, the residual crude products was purified by column chromatography (SiO<sub>2</sub>, PE/EA=1:1, v/v; R<sub>f</sub>=0.3) to afford compound **3aj** (yellow oil, 39.7mg, yield=40%).

HRMS(ESI<sup>+</sup>)m/z: [M+H]<sup>+</sup> calcd for C<sub>18</sub>H<sub>16</sub>ClN<sub>2</sub>O<sub>2</sub>, 327.0895; found, 327.0897.

<sup>1</sup>H NMR (400 MHz, Chloroform-*d*) δ 9.30 (dt, *J* = 7.4, 1.2 Hz, 1H), 7.87 (dt, *J* = 9.1, 1.2 Hz, 1H), 7.72 (s, 1H), 7.54 – 7.44 (m, 3H), 7.36 – 7.28 (m, 2H), 7.13 (ddd, *J* = 7.8, 6.6, 1.5 Hz, 1H), 3.12 (d, *J* = 27.8 Hz, 6H).

<sup>13</sup>C NMR (101 MHz, Chloroform-*d*) δ 168.4, 156.3, 141.0, 138.0, 135.8, 133.7, 132.2, 131.4, 129.8, 129.1, 128.5, 126.7, 123.6, 117.4, 115.8, 109.0.

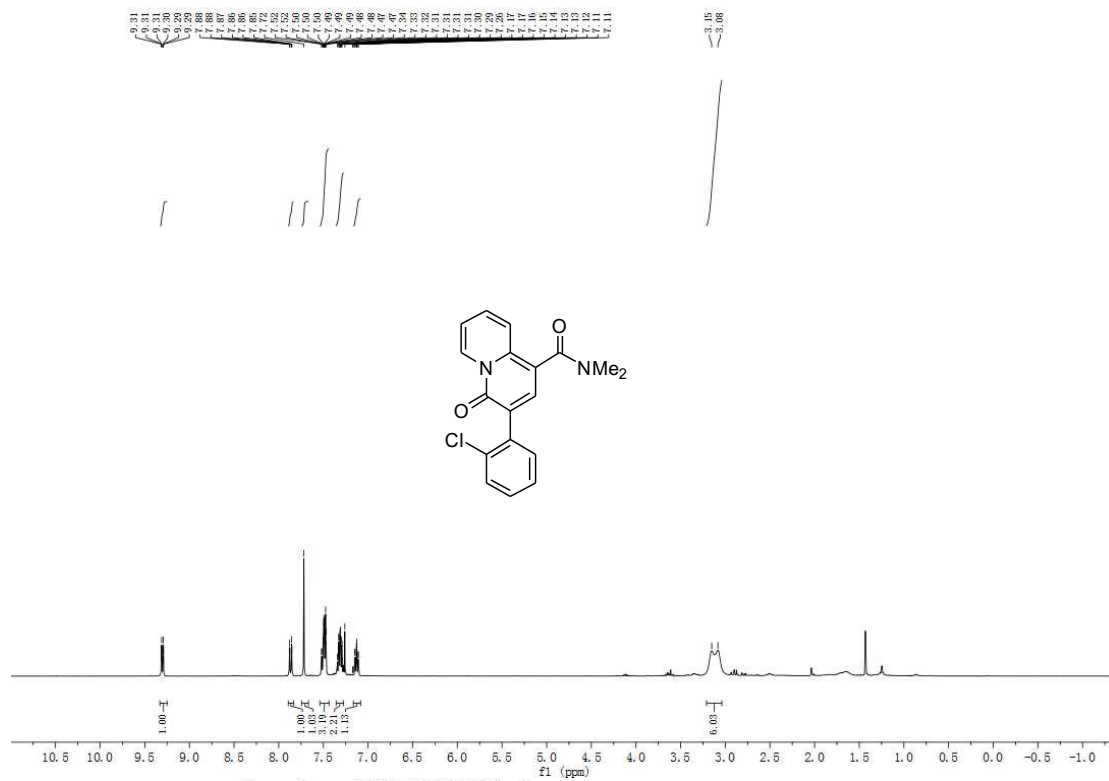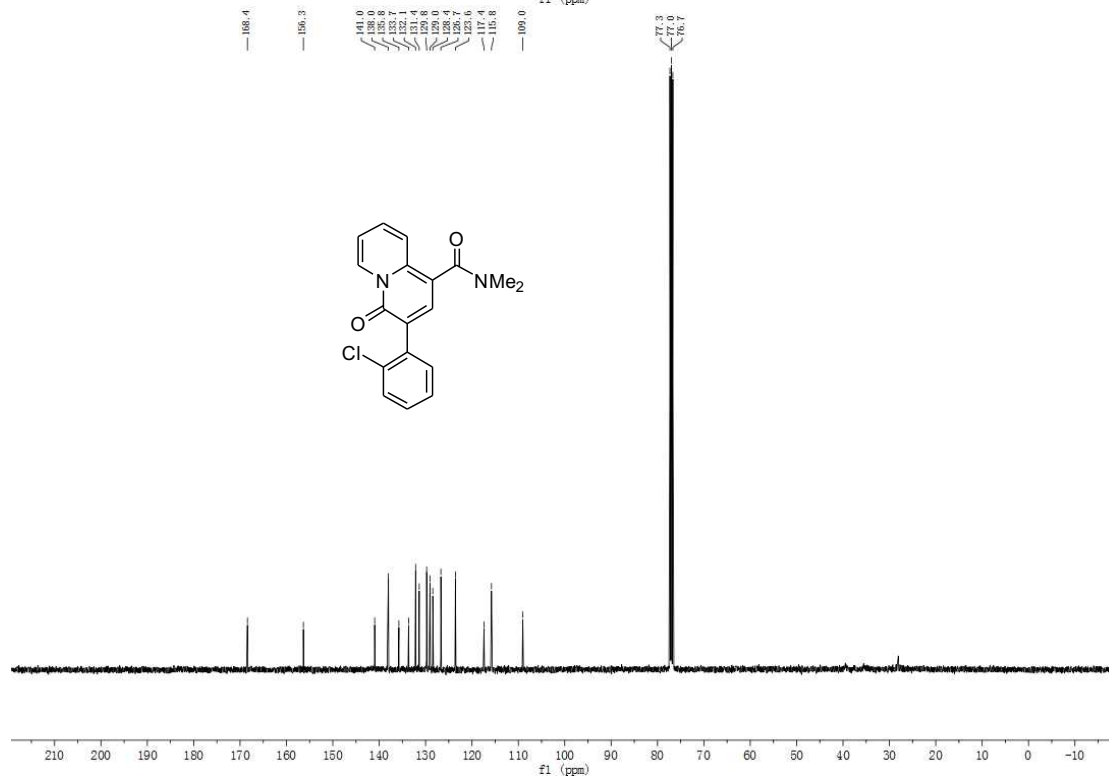

**3ak:**  
**3-(2-chlorophenyl)-N,N-diethyl-4-oxo-4H-quinolizine-1-carboxamide**

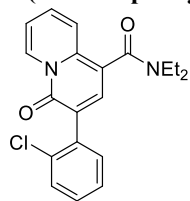

**General procedure:** 1-(1-(2-chlorophenyl)-2-methoxy-2-oxoethyl)pyridin-1-ium bromide **1a** (0.45mmol, 154.2mg, 1.5equiv), N,N-diethylacrylamide **2k** (0.3mmol, 41.3μL, 1.0equiv), 2,2,6,6-Tetramethylpiperidoxyl (TEMPO, 0.75mmol, 117.2mg, 2.5equiv), 1,8-Diazabicyclo[5.4.0]undec-7-ene (DBU, 0.9mmol, 134.4μL, 3.0equiv) were added sequentially to 3.0mL of DMSO. The mixture was stirred at 120°C for 40h in Ar. After the reaction liquid was cooled to room temperature, 100ml of water was added and extracted by 50ml of ethyl acetate for three times. The organic phase was isolated and ethyl acetate was removed by rotary evaporator, the residual crude products was purified by column chromatography (SiO<sub>2</sub>, PE/EA=1:1, v/v; Rf=0.3) to afford compound **3ak** (yellow oil, 29.0mg, yield=27%).

HRMS(ESI<sup>+</sup>)m/z: [M+H]<sup>+</sup> calcd for C<sub>20</sub>H<sub>20</sub>ClN<sub>2</sub>O<sub>2</sub>, 355.1208; found, 355.1202.

<sup>1</sup>H NMR (400 MHz, Chloroform-*d*) δ 9.30 (dt, *J* = 7.4, 1.1 Hz, 1H), 7.74 (dt, *J* = 9.1, 1.2 Hz, 1H), 7.68 (s, 1H), 7.52 – 7.45 (m, 3H), 7.38 – 7.28 (m, 2H), 7.12 (ddd, *J* = 7.8, 6.6, 1.4 Hz, 1H), 3.74 – 3.31 (m, 4H), 1.29 – 1.05 (m, 6H).

<sup>13</sup>C NMR (101 MHz, Chloroform-*d*) δ 167.8, 156.3, 140.4, 137.1, 135.8, 133.7, 132.1, 131.2, 129.8, 129.0, 128.4, 126.7, 123.2, 117.8, 115.7, 110.2.

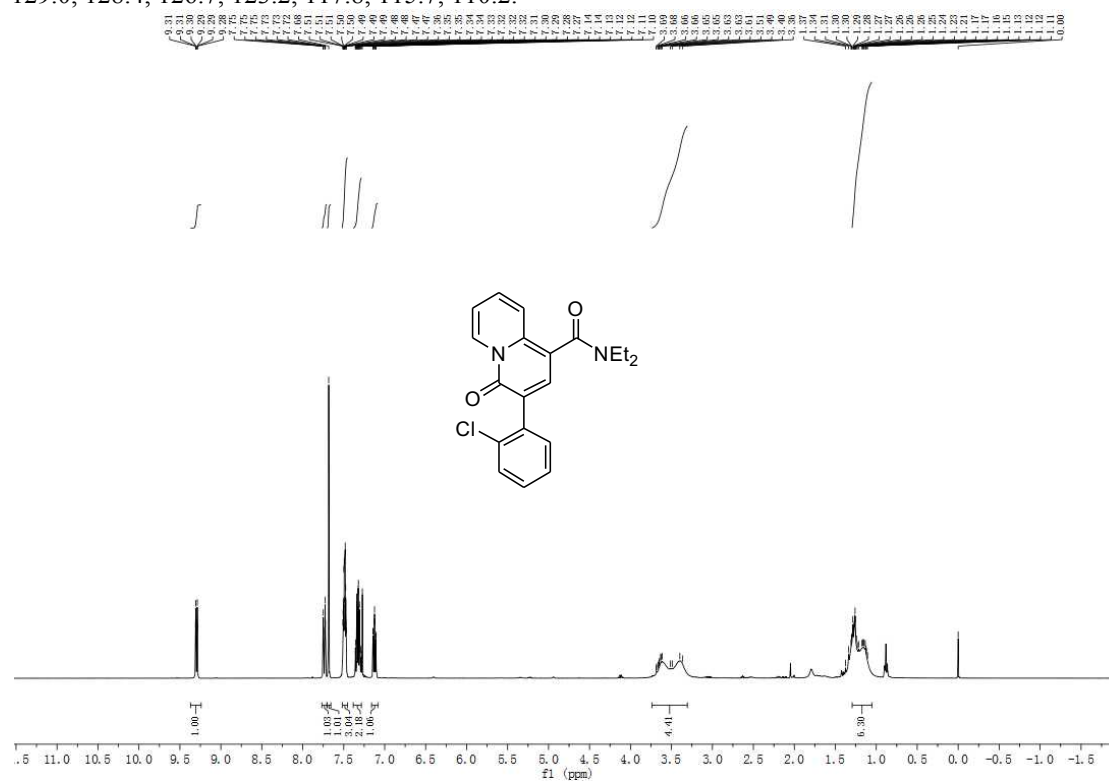

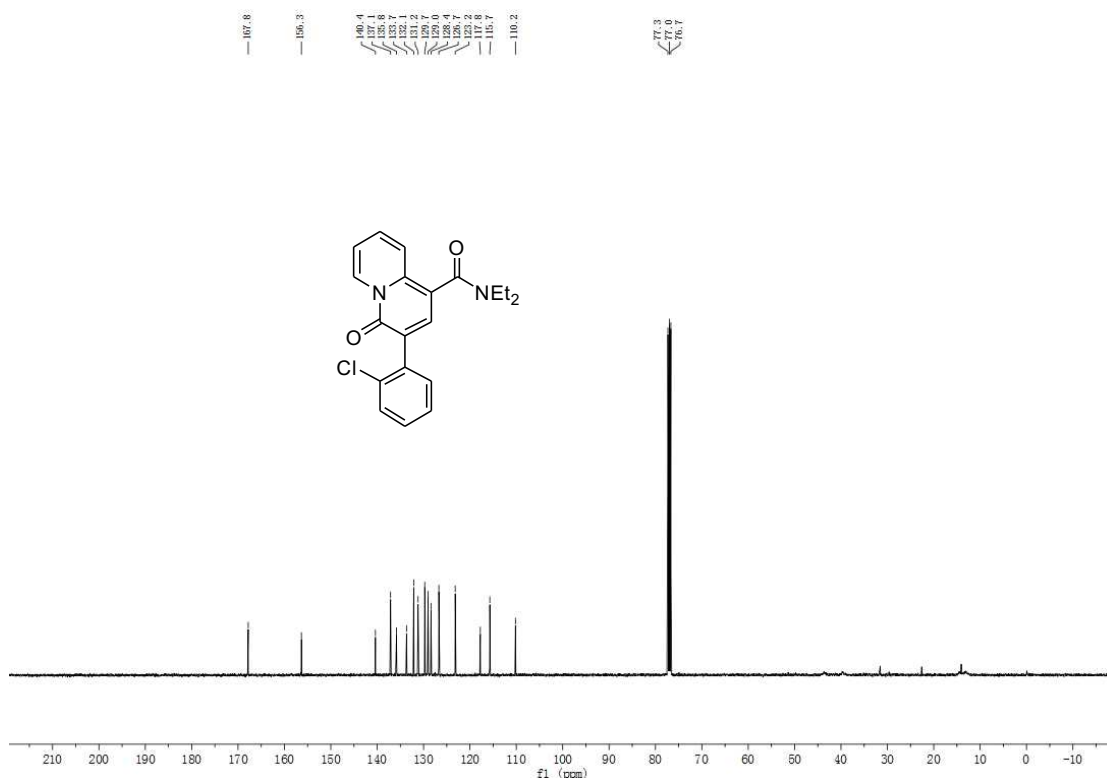

**3al:**

***tert*-butyl 3-(2-chlorophenyl)-4-oxo-4H-quinolizine-1-carboxylate**

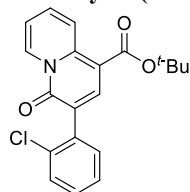

**General procedure:** 1-(1-(2-chlorophenyl)-2-methoxy-2-oxoethyl)pyridin-1-ium bromide **1a** (0.3mmol, 102.8mg, 1.0equiv), *tert*-butyl acrylate **2l** (0.6mmol, 88.0μL, 2.0equiv), 2,2,6,6-Tetramethylpiperidoxyl (TEMPO, 0.75mmol, 117.2mg, 2.5equiv), 1,8-Diazabicyclo[5.4.0]undec-7-ene (DBU, 0.9mmol, 134.4μL, 3.0equiv) were added sequentially to 3.0mL of toluene. The mixture was stirred at 100°C for 40h in Ar atmosphere. Then solvent was removed by rotary evaporator, the residual crude products was purified by column chromatography (SiO<sub>2</sub>, PE/EA=2:1, v/v; Rf=0.5) to afford compound **3al** (yellow oil, 34.4mg, yield=32%).

HRMS(ESI<sup>+</sup>)m/z: [M+H]<sup>+</sup> calcd for C<sub>20</sub>H<sub>19</sub>ClNO<sub>3</sub>, 356.1048; found, 356.1051.

<sup>1</sup>H NMR (400 MHz, Chloroform-*d*) δ 9.40 (ddd, *J* = 7.3, 1.4, 0.8 Hz, 1H), 9.31 (ddd, *J* = 9.3, 1.4, 0.9 Hz, 1H), 8.43 (s, 1H), 7.68 (ddd, *J* = 9.3, 6.6, 1.5 Hz, 1H), 7.55 – 7.43 (m, 2H), 7.40 – 7.29 (m, 2H), 7.22 (ddd, *J* = 7.3, 6.6, 1.5 Hz, 1H), 1.61 (s, 9H).

<sup>13</sup>C NMR (101 MHz, Chloroform-*d*) δ 164.6, 156.8, 144.5, 141.5, 136.0, 134.0, 133.2, 132.0, 129.7, 129.0, 128.9, 126.7, 124.1, 117.0, 116.2, 103.4, 81.3, 28.3.

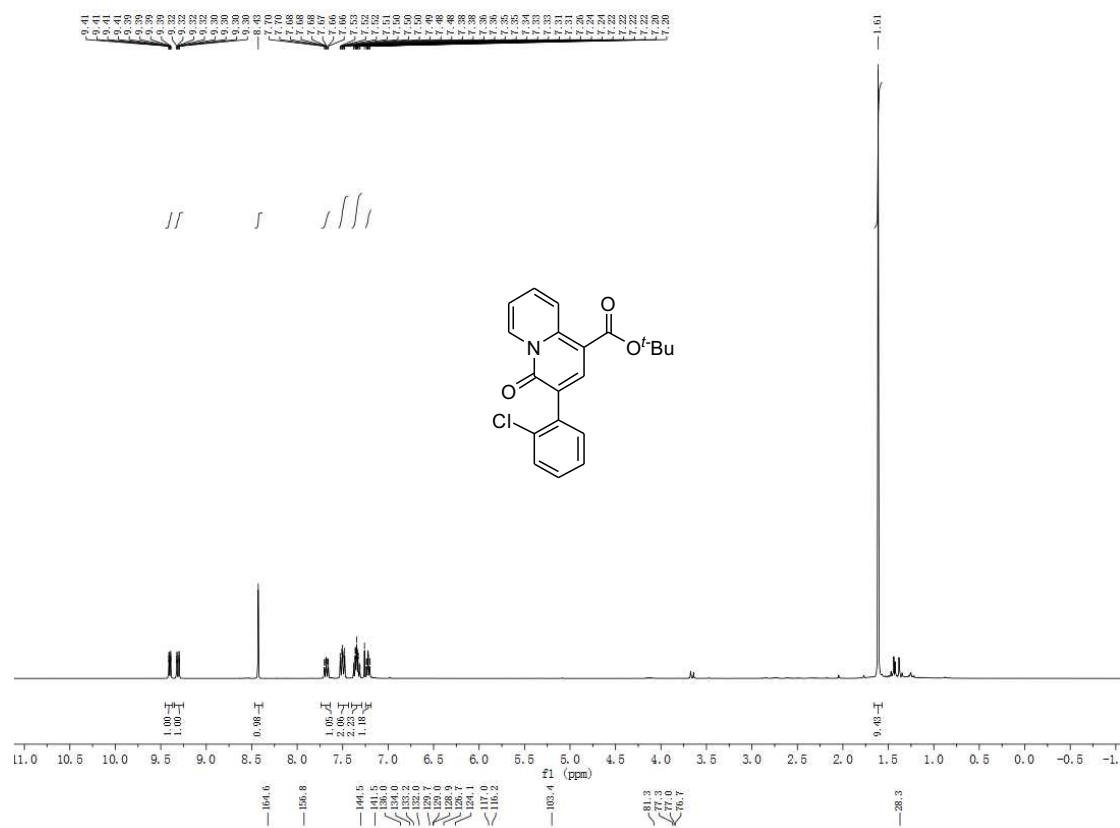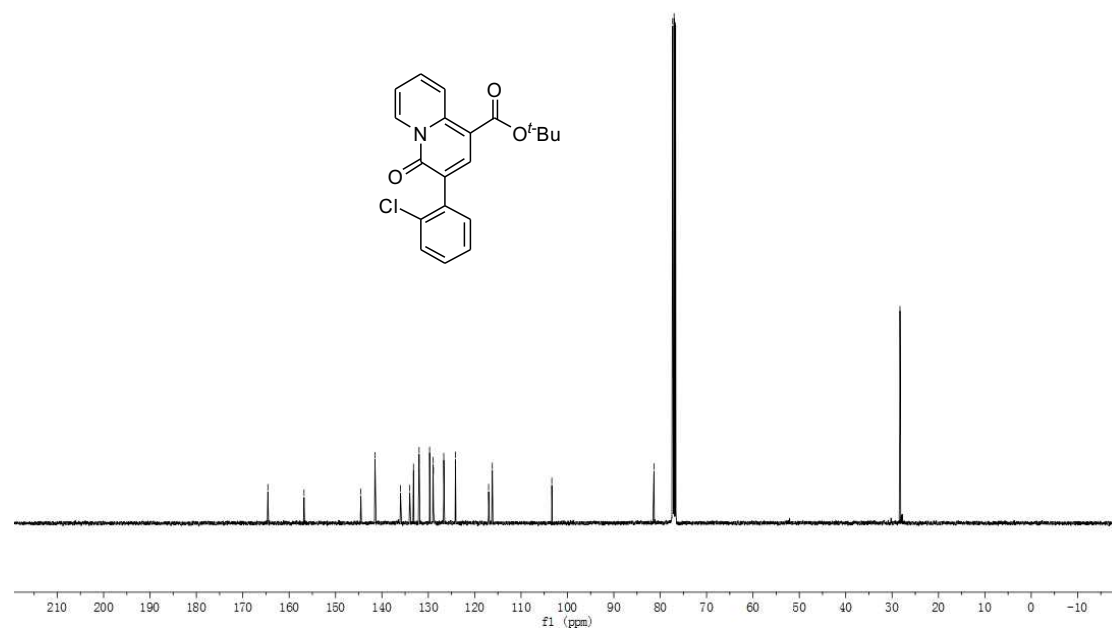

**3am:**  
**diethyl (3-(2-chlorophenyl)-4-oxo-4H-quinolizin-1-yl)phosphonate**

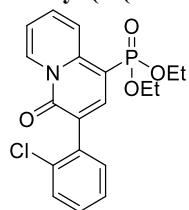



**General procedure:** 1-(1-(2-chlorophenyl)-2-methoxy-2-oxoethyl)pyridin-1-ium bromide **1a** (0.6mmol, 205.6mg, 2.0equiv), diethyl vinylphosphonate **2m** (0.3mmol, 46.3 $\mu$ L, 1.0equiv), 2,2,6,6-Tetramethylpiperidoxyl (TEMPO, 0.75mmol, 117.2mg, 2.5equiv), 1,8-Diazabicyclo[5.4.0]undec-7-ene (DBU, 1.2mmol, 179.2 $\mu$ L, 4.0equiv) were added sequentially to 3.0mL of toluene. The mixture was stirred at 100 $^{\circ}$ C for 20h in N<sub>2</sub> atmosphere. Then solvent was removed by rotary evaporator, the residual crude products was purified by column chromatography (SiO<sub>2</sub>, PE/EA=0:1, v/v; Rf=0.5) to afford compound **3am** (yellow oil, 13.0mg, yield=11%).

HRMS(ESI<sup>+</sup>)m/z: [M+H]<sup>+</sup> calcd for C<sub>19</sub>H<sub>20</sub>ClNO<sub>4</sub>P, 392.0813; found, 392.0808.

<sup>1</sup>H NMR (400 MHz, Chloroform-*d*)  $\delta$  9.40 (d, *J* = 7.2 Hz, 1H), 8.55 (dd, *J* = 9.2, 1.3 Hz, 1H), 8.20 (d, *J* = 13.7 Hz, 1H), 7.66 (ddd, *J* = 8.7, 6.7, 1.4 Hz, 1H), 7.53 – 7.45 (m, 2H), 7.36 – 7.30 (m, 2H), 7.26 – 7.21 (m, 1H), 4.27 – 4.06 (m, 4H), 1.34 (t, *J* = 7.1 Hz, 6H).

<sup>13</sup>C NMR (101 MHz, Chloroform-*d*)  $\delta$  156.9, 145.4, 143.6, 143.5, 135.8, 134.0, 132.8, 132.1, 129.8, 129.2, 129.1, 126.7, 124.8, 124.7, 117.8, 117.6, 116.3, 99.2, 97.1, 77.2, 62.4, 16.3.

<sup>31</sup>P NMR (162 MHz, CDCl<sub>3</sub>)  $\delta$  17.89.

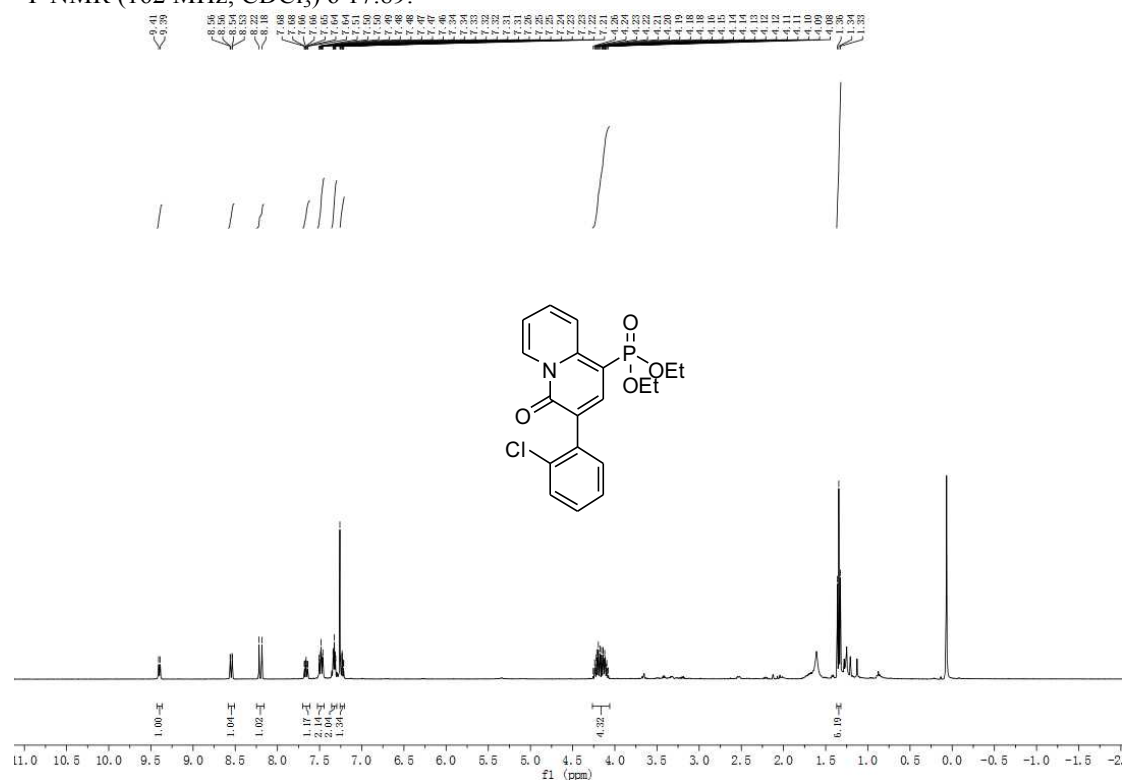

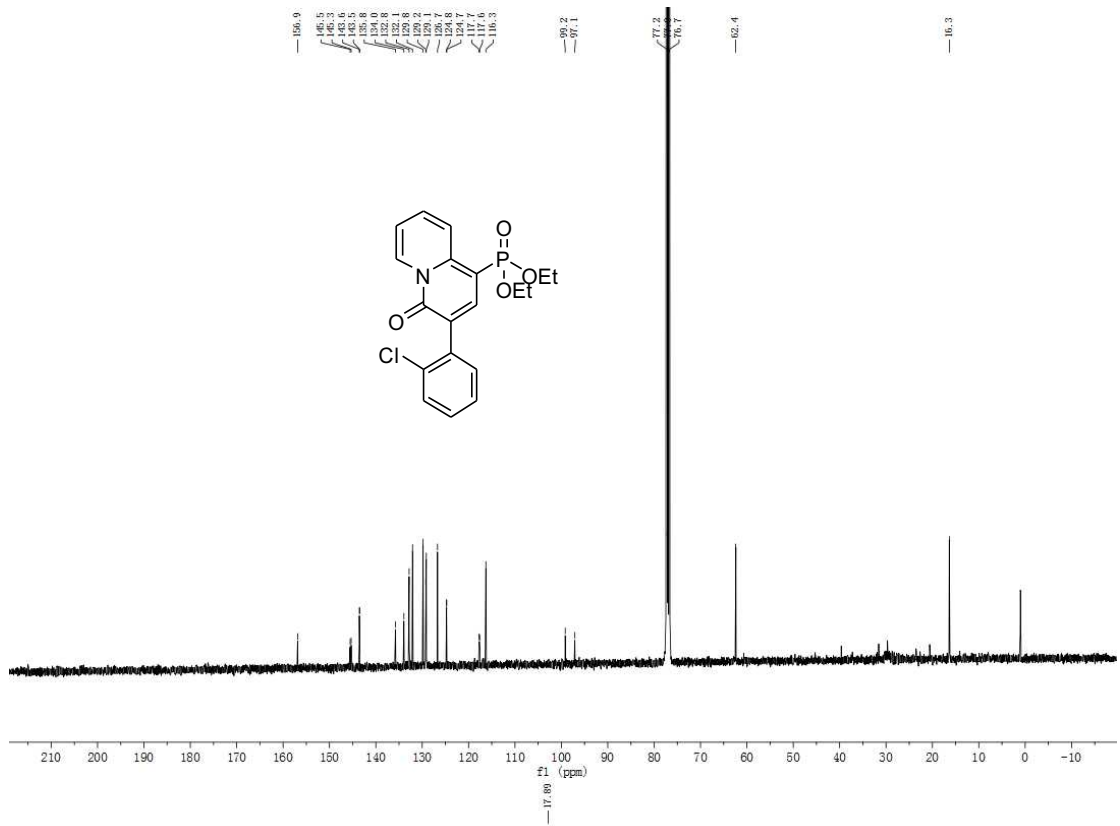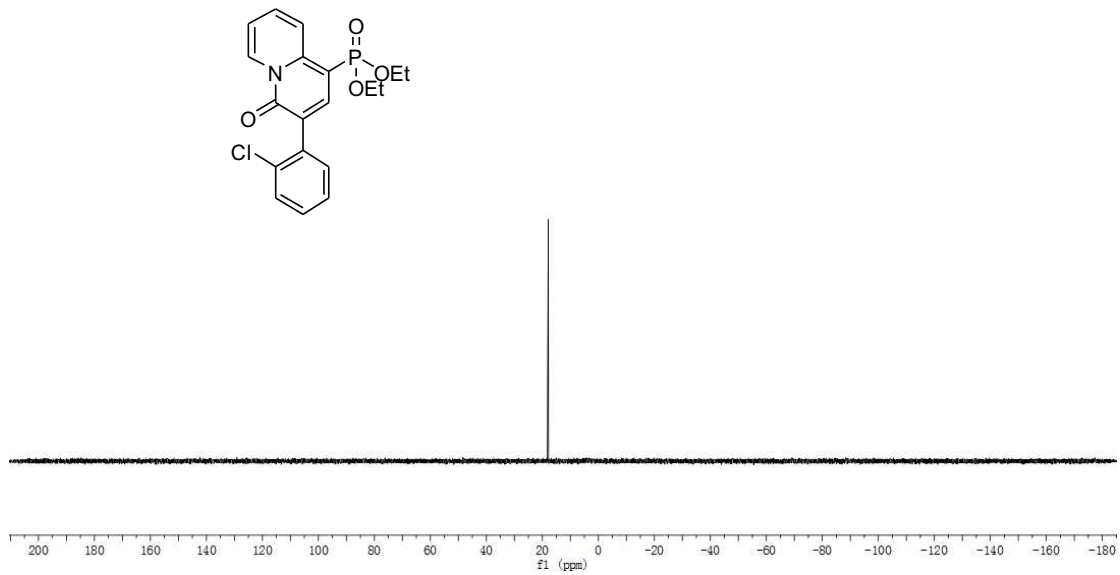

## 4. Three-Component Reaction and Mechanism Study

Scheme 4:

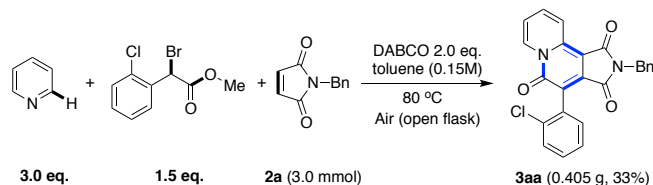

**General procedure:** pyridine (9.0 mmol, 728.0 uL), methyl 2-bromo-2-(2-chlorophenyl)acetate (4.5 mmol, 757.0 uL), 1-benzyl-1H-pyrrole-2,5-dione **2a** (3.0 mmol, 562.0 mg, 1.0equiv), and 1,4-Diazabicyclo[2.2.2]octane (DABCO, 6.0 mmol, 673.0 mg, 2.0equiv) were added sequentially to 20.0mL of toluene. The mixture was stirred at 80°C for 72h in open flask. Then solvent was removed by rotary evaporator, the residual crude products was purified by column chromatography (SiO<sub>2</sub>, PE/EA=2:1, v/v; R<sub>f</sub>=0.4) to afford compound **3aa** (yellow solid, 405.0 mg, yield=33%).

Scheme 5:

1-(*tert*-butyl) 3-methyl 3-(2-chlorophenyl)-2,3-dihydroindolizine-1,3-dicarboxylate (**5al**)

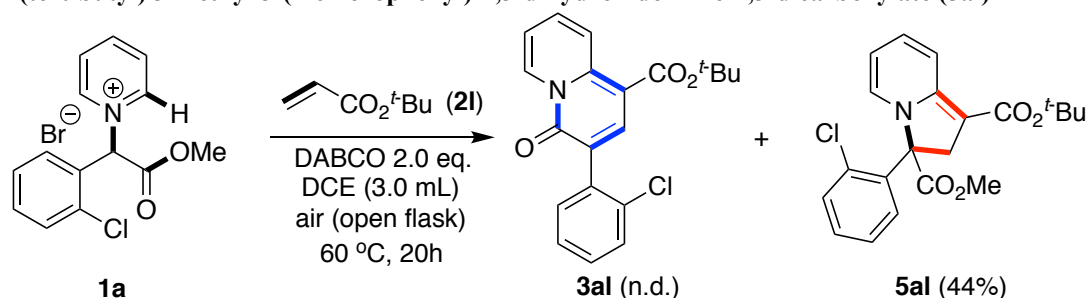

**General procedure:** 1-(1-(2-chlorophenyl)-2-methoxy-2-oxoethyl)pyridin-1-ium bromide **1a** (0.36mmol, 123.3mg, 1.2equiv), *tert*-butyl acrylate **2I** (0.3mmol, 44.0μL, 1.0equiv), 1,4-Diazabicyclo[2.2.2]octane (DABCO, 0.6mmol, 67.3mg, 2.0equiv) were added sequentially to 3.0mL of 1,2-Dichloroethane. The mixture was stirred at 60°C for 20h in open flask. Then solvent was removed by rotary evaporator, the residual crude products was purified by column chromatography (SiO<sub>2</sub>, PE/EA=5:1, v/v; R<sub>f</sub>=0.65) to afford compound **5al** (orange oil, 50.6mg, yield=44%).

<sup>1</sup>H NMR (400 MHz, Chloroform-*d*) δ 7.42 (dd, *J* = 7.5, 1.7 Hz, 1H), 7.32 – 7.21 (m, 3H), 7.06 (dd, *J* = 7.6, 1.9 Hz, 1H), 6.95 (dt, *J* = 7.1, 1.2 Hz, 1H), 6.82 – 6.74 (m, 1H), 5.70 (ddd, *J* = 7.3, 6.3, 1.3 Hz, 1H), 4.08 (d, *J* = 15.9 Hz, 1H), 3.85 (s, 3H), 2.97 (d, *J* = 15.8 Hz, 1H), 1.47 (s, 9H).

<sup>13</sup>C NMR (101 MHz, Chloroform-*d*) δ 169.8, 165.9, 134.3, 133.6, 131.2, 129.5, 126.9, 118.7, 105.4, 53.6, 40.7, 28.8.

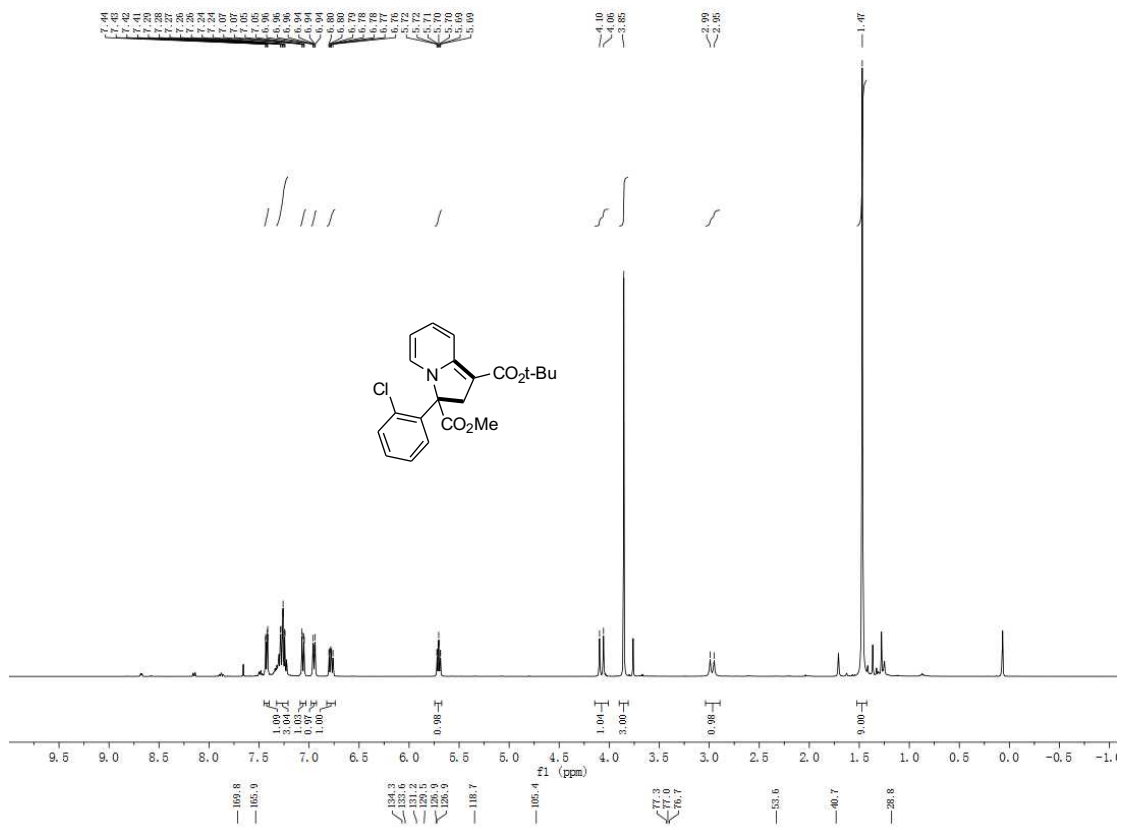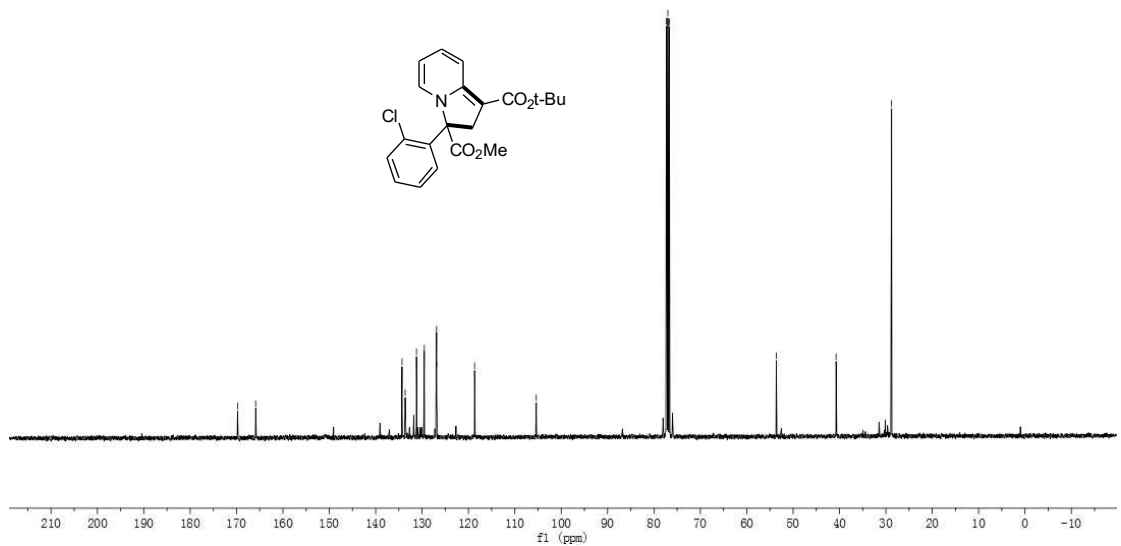

***tert*-butyl 3-(2-chlorophenyl)indolizine-1-carboxylate (**4a**)**

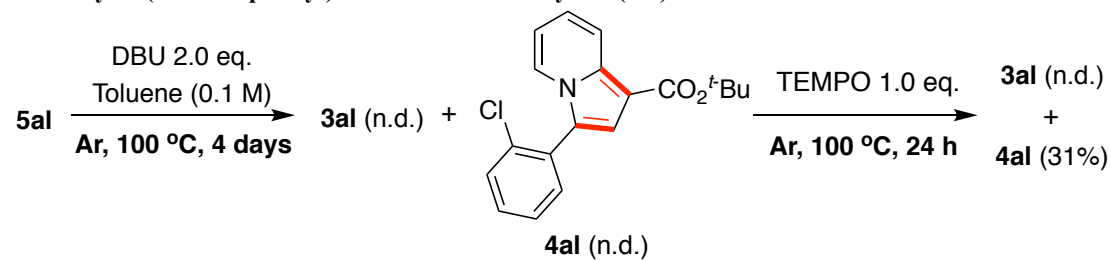

**Synthesis procedure:** **5a** (0.45mmol, 174.6mg, 1.0equiv) and DBU (0.9mmol, 135.0 uL, 2.0equiv) were added to 4.5mL of toluene. The mixture was stirred at 100 °C for 4 days in Ar atmosphere. Neither 4*H*-quinolizin-4-one (**3a**) nor indolizine (**4a**) were observed by TLC. Then TEMPO (0.45 mmol, 70.3mg, 1.0equiv) was added in the reaction mixture. After 24 hours, solvent was removed by rotary evaporator, the residual crude products were purified by column chromatography (SiO<sub>2</sub>, PE/EA=5:1, v/v; R<sub>f</sub>=0.8) to afford compound **4a** (orange oil, 45.4mg, yield=31%).

<sup>1</sup>H NMR (400 MHz, Chloroform-*d*) δ 8.22 (dt, *J* = 9.1, 1.2 Hz, 1H), 7.64 (dt, *J* = 7.0, 1.1 Hz, 1H), 7.52 – 7.49 (m, 1H), 7.44 – 7.34 (m, 3H), 7.26 – 7.23 (m, 1H), 7.08 – 7.03 (m, 1H), 6.67 (td, *J* = 6.8, 1.4 Hz, 1H), 1.62 (s, 9H).

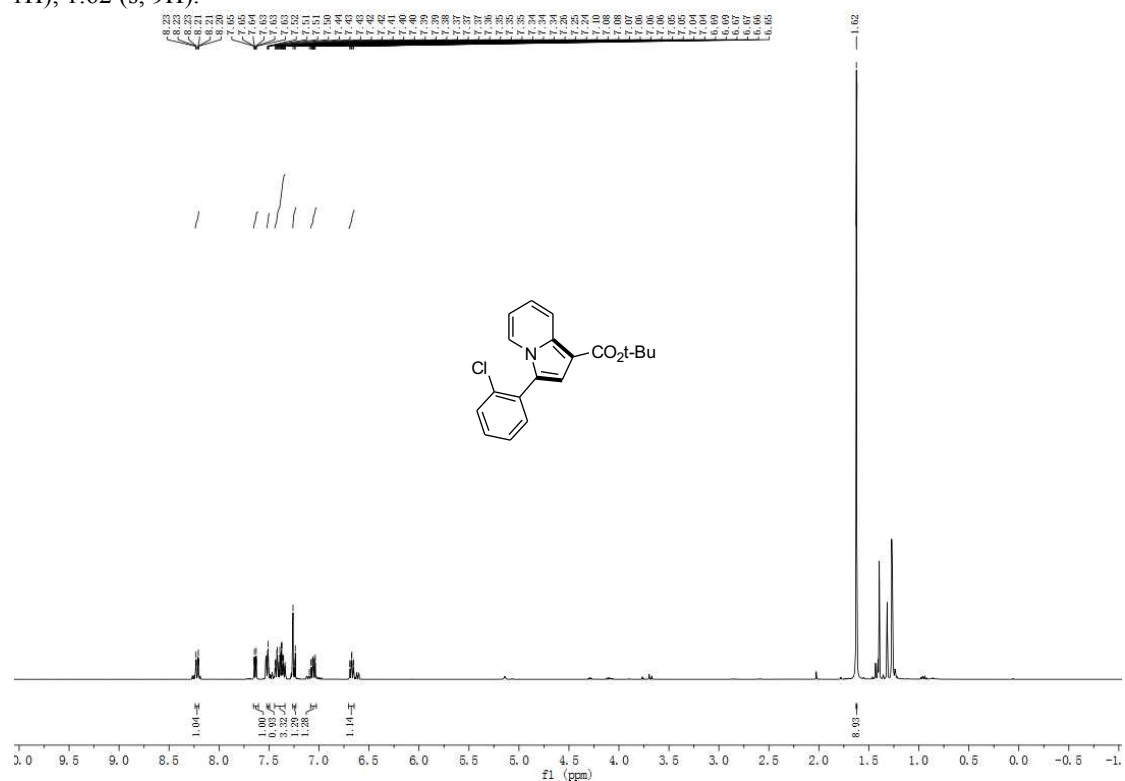

**Scheme 6A:**  
**diethyl 2-benzyl-1,3-dioxo-1,2,3,3a,9a,9b-hexahydro-4H-pyrrolo[3,4-a]indolizine-4,4-dicarboxylate (6da)**

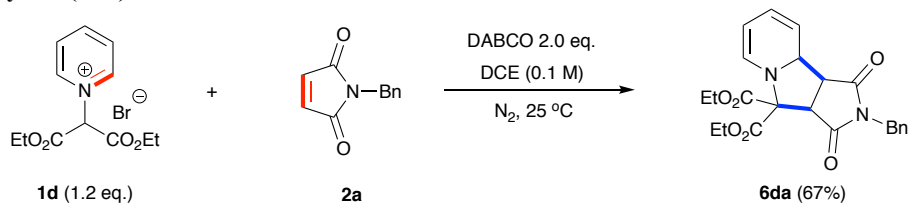

**Synthesis procedure:** 1-(1,3-diethoxy-1,3-dioxopropan-2-yl)pyridin-1-ium bromide **1d** (0.36 mmol, 114.6 mg, 1.2 equiv), 1-benzyl-1H-pyrrole-2,5-dione **2a** (0.3 mmol, 56.2 mg, 1.0 equiv), 1,4-Diazabicyclo[2.2.2]octane (DABCO, 0.6 mmol, 67.3 mg, 2.0 equiv) were added sequentially to 3.0 mL of 1,2-Dichloroethane. The mixture was stirred at 25 °C for 2 h under a nitrogen atmosphere. Then solvent was removed by rotary evaporator, the residual crude products was purified by column chromatography (SiO<sub>2</sub>, PE/EA=5:1, v/v; R<sub>f</sub>=0.5) to afford compound **6da** (yellow oil, 85.6 mg, yield= 67%).

HRMS(ESI<sup>+</sup>)m/z: [M+Na]<sup>+</sup> calcd for C<sub>23</sub>H<sub>25</sub>N<sub>2</sub>O<sub>6</sub>Na, 447.1527; found, 447.1522.

<sup>1</sup>H NMR (400 MHz, Chloroform-*d*) δ 7.30 – 7.25 (m, 5H), 6.53 (d, *J* = 7.5 Hz, 1H), 5.94 – 5.86 (m, 1H), 5.65 (dd, *J* = 9.8, 1.8 Hz, 1H), 5.11 (ddd, *J* = 7.1, 5.4, 1.3 Hz, 1H), 4.71 – 4.58 (m, 2H), 4.38 – 4.25 (m, 4H), 4.25 – 4.20 (m, 1H), 4.03 (d, *J* = 7.9 Hz, 1H), 3.40 (t, *J* = 8.1 Hz, 1H), 1.29 (dt, *J* = 7.3, 3.7 Hz, 6H).

<sup>13</sup>C NMR (101 MHz, Chloroform-*d*) δ 175.0, 174.2, 166.2, 165.3, 135.0, 132.8, 128.6, 128.1, 127.8, 124.7, 113.1, 101.94, 73.8, 62.7, 62.5, 58.4, 49.4, 45.2, 42.7, 14.3, 13.9.

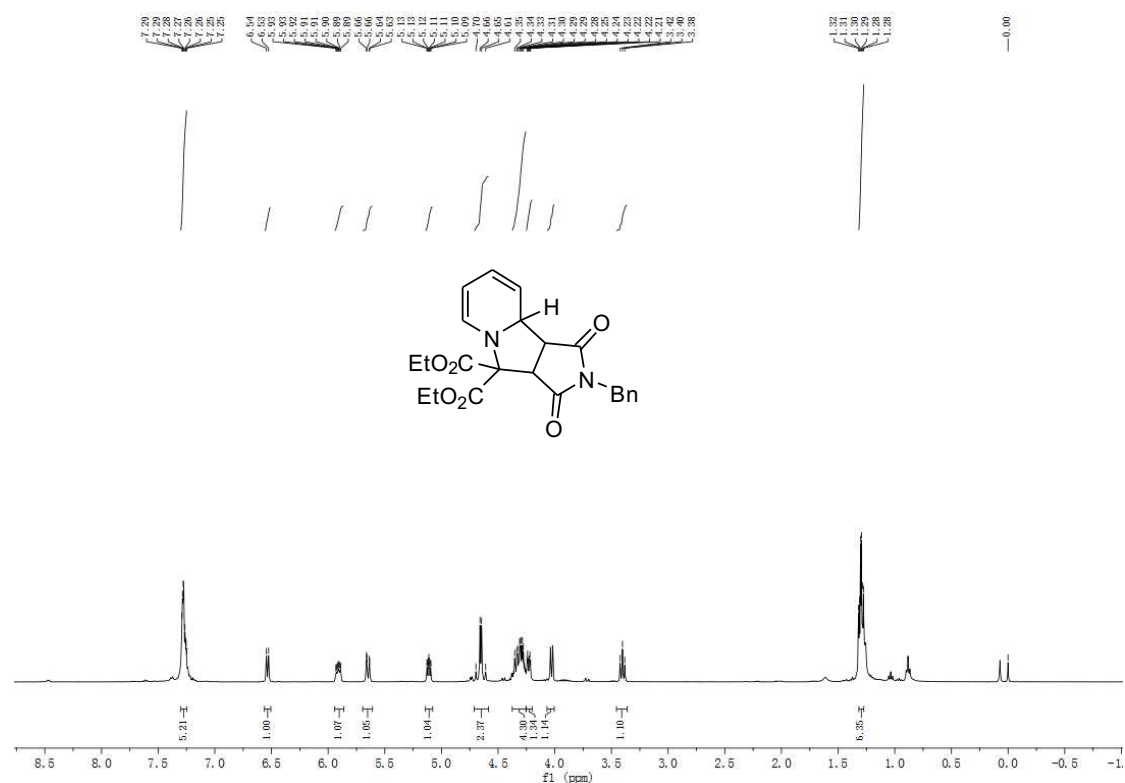

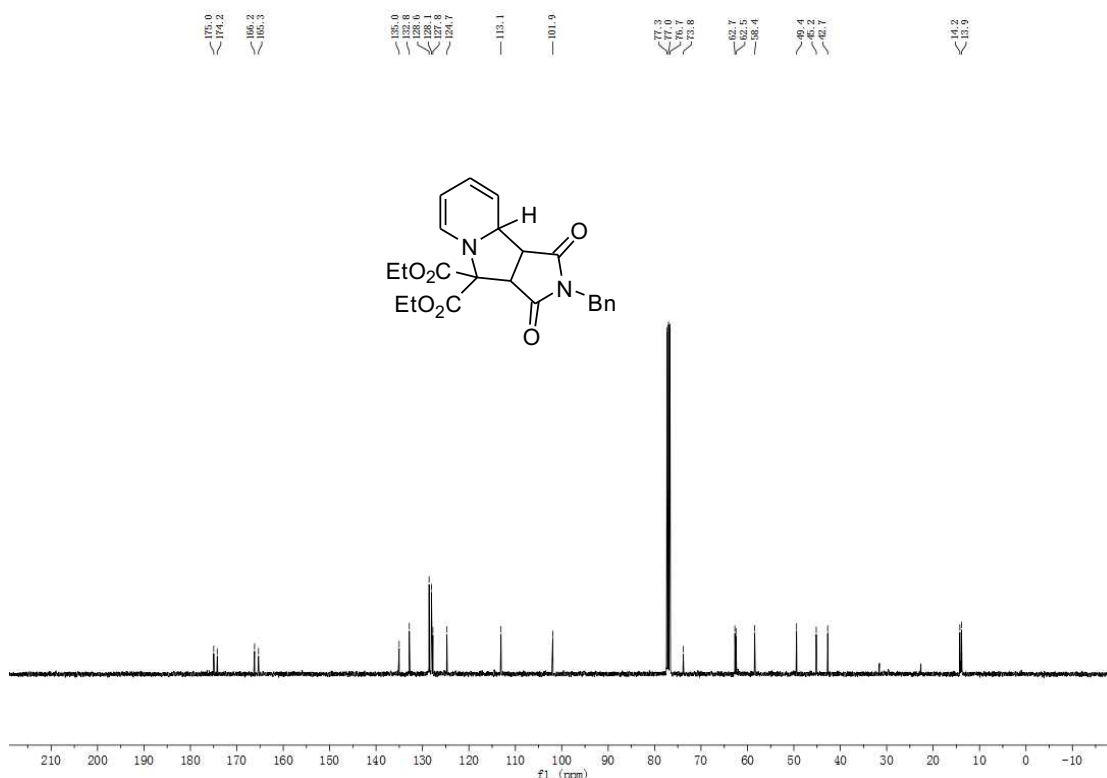

#### Scheme 6B: NMR Yield.

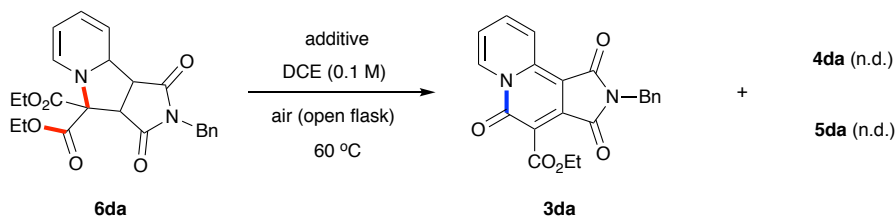

- (A) additive = none, yield = 28% (conversion = 100%)  
 (B) additive = DABCO 1.0 eq., yield = 42% (conversion = 100%)  
 (C) additive = DABCO 1.0 eq. & **1d** 50 mol%, yield = 56% (conversion = 100%)

**(A)** diethyl 2-benzyl-1,3-dioxo-1,2,3,3a,9a,9b-hexahydro-4H-pyrrolo[3,4-a]indolizine-4,4-dicarboxylate **6da** (0.3 mmol, 127.4mg) were added to 3.0mL of DCE. The mixture was stirred at 60 °C for 40h under open-flask conditions. 28% NMR Yield of **3da** was obtained using 1,3,5-trimethoxybenzene as internal standard.

**(B)** diethyl 2-benzyl-1,3-dioxo-1,2,3,3a,9a,9b-hexahydro-4H-pyrrolo[3,4-a]indolizine-4,4-dicarboxylate **6da** (0.3 mmol, 127.4mg) and DABCO (0.3mmol, 33.6mg) were added to 3.0mL of DCE. The mixture was stirred at 60 °C for 40h under open-flask conditions. 42% NMR Yield of **3da** was obtained using 1,3,5-trimethoxybenzene as internal standard.

**(C)** diethyl 2-benzyl-1,3-dioxo-1,2,3,3a,9a,9b-hexahydro-4H-pyrrolo[3,4-a]indolizine-4,4-dicarboxylate **6da** (0.3 mmol, 127.4mg), DABCO (0.3mmol, 33.6mg) and **1d** (0.15mmol, 47.7mg, 0.5equiv.) were added to 3.0mL of DCE. The mixture was stirred at 60 °C for 40h under open-flask conditions. 42% NMR Yield of **3da** was obtained using 1,3,5-trimethoxybenzene as internal standard.

**Scheme 6C:**

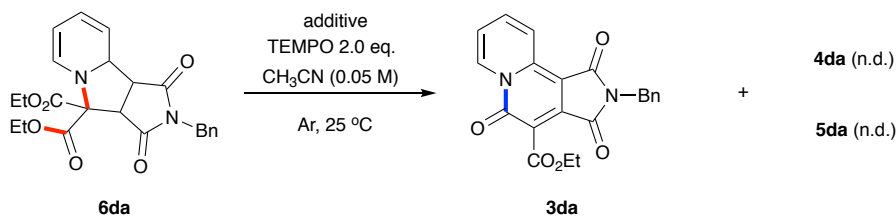

(A) additive = none, yield = 45% (conversion = 100%)

(B) additive = DABCO 3.0 eq., yield = 47% (conversion = 100%)

(C) additive = DABCO 3.0 eq. & **1d** 50 mol%, yield = 76% (conversion = 100%)

**(A)** diethyl 2-benzyl-1,3-dioxo-1,2,3,3a,9a,9b-hexahydro-4H-pyrrolo[3,4-a]indolizine-4,4-dicarboxylate **6da** (0.3 mmol, 127.4mg) and TEMPO (0.6mmol, 93.8mg, 2.0equiv) were added sequentially to 6.0mL of CH<sub>3</sub>CN. The mixture was stirred at 25 °C for 20h in an Argon atmosphere. Then solvent was removed by rotary evaporator, the residual crude products was purified by column chromatography (SiO<sub>2</sub>, PE/EA=1:1, v/v; Rf=0.5) to afford compound **3da** (yellow solid, m.p=169-171°C, 51.2mg, yield=45%).

**(B)** diethyl 2-benzyl-1,3-dioxo-1,2,3,3a,9a,9b-hexahydro-4H-pyrrolo[3,4-a]indolizine-4,4-dicarboxylate **6da** (0.3 mmol, 127.4mg), DABCO (0.9mmol, 101.0mg) and TEMPO (0.6mmol, 93.8mg, 2.0equiv) were added sequentially to 6.0mL of CH<sub>3</sub>CN. The mixture was stirred at 25 °C for 20h in an Argon atmosphere. Then solvent was removed by rotary evaporator, the residual crude products was purified by column chromatography (SiO<sub>2</sub>, PE/EA=1:1, v/v; Rf=0.5) to afford compound **3da** (yellow solid, m.p=169-171°C, 53.2mg, yield=47%).

**(C)** diethyl 2-benzyl-1,3-dioxo-1,2,3,3a,9a,9b-hexahydro-4H-pyrrolo[3,4-a]indolizine-4,4-dicarboxylate **6da** (0.3 mmol, 127.4mg), DABCO (0.9mmol, 101.0mg), **1d** (0.15mmol, 47.7mg, 0.5equiv.) and TEMPO (0.6mmol, 93.8mg, 2.0equiv) were added sequentially to 6.0mL of CH<sub>3</sub>CN. The mixture was stirred at 25 °C for 20h in an Argon atmosphere. Then solvent was removed by rotary evaporator, the residual crude products was purified by column chromatography (SiO<sub>2</sub>, PE/EA=1:1, v/v; Rf=0.5) to afford compound **3da** (yellow solid, m.p=169-171°C, 85.8mg, yield=76%).



**Scheme 7A:**

**methyl 10-benzyl-2,3-dimethoxy-9,11-dioxo-8-phenyl-5,8,8a,9,10,11,11a,11b-octahydro-6H-pyrrolo[3',4':3,4]pyrrolo[2,1-a]isoquinoline-8-carboxylate (6a)**

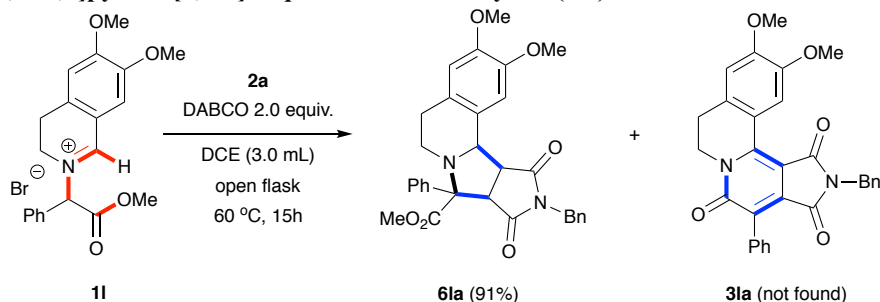

**General procedure:** 6,7-dimethoxy-2-(2-methoxy-2-oxo-1-phenylethyl)-3,4-dihydroisoquinolin-2-ium bromide **11** (0.25mmol, 107.5mg, 1.25equiv), 1-benzyl-1H-pyrrole-2,5-dione **2a** (0.2mmol, 37.5mg, 1.0equiv), 1,4-Diazabicyclo[2.2.2]octane (DABCO, 0.6mmol, 44.9mg, 2.0equiv) were added sequentially to 3.0mL of 1,2-Dichloroethane. The mixture was stirred at 60°C for 15h in open flask. Then solvent was removed by rotary evaporator, the residual crude products were purified by column chromatography (SiO<sub>2</sub>, PE/EA=5:1, v/v; R<sub>f</sub>=0.6) to afford compound **6a** (yellow oil, 95.9mg, yield=91%).

HRMS(ESI<sup>+</sup>)m/z: [M+H]<sup>+</sup> calcd for C<sub>31</sub>H<sub>31</sub>N<sub>2</sub>O<sub>6</sub>, 527.2177; found, 527.2185.

<sup>1</sup>H NMR (400 MHz, Chloroform-*d*) δ 7.63 – 7.56 (m, 3H), 7.51 – 7.45 (m, 2H), 7.44 – 7.37 (m, 2H), 7.37 – 7.27 (m, 4H), 6.66 (s, 1H), 4.77 (s, 2H), 3.97 (s, 3H), 3.89 (s, 3H), 3.48 (s, 3H).

<sup>13</sup>C NMR (101 MHz, Chloroform-*d*) δ 176.4, 175.6, 169.0, 147.9, 147.7, 139.9, 135.8, 129.1, 128.6, 128.5, 127.9, 127.9, 126.4, 125.6, 111.2, 109.8, 61.9, 56.8, 56.0, 55.9, 51.5, 49.6, 44.4, 42.8, 29.4.

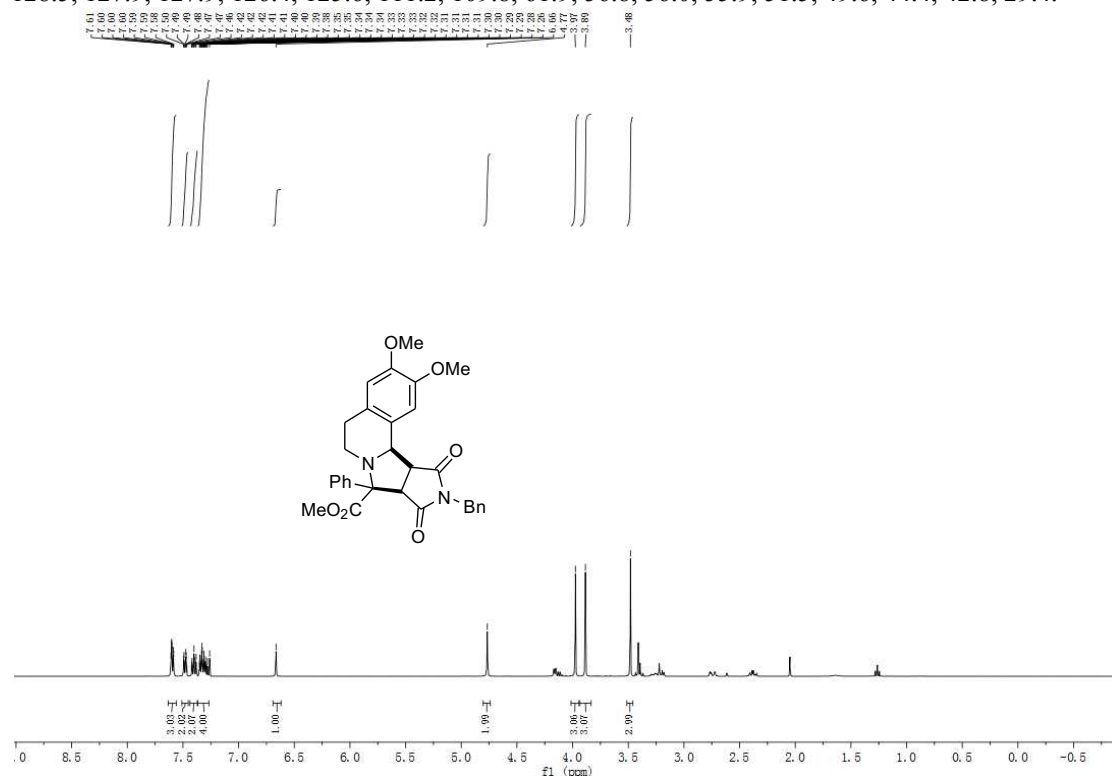

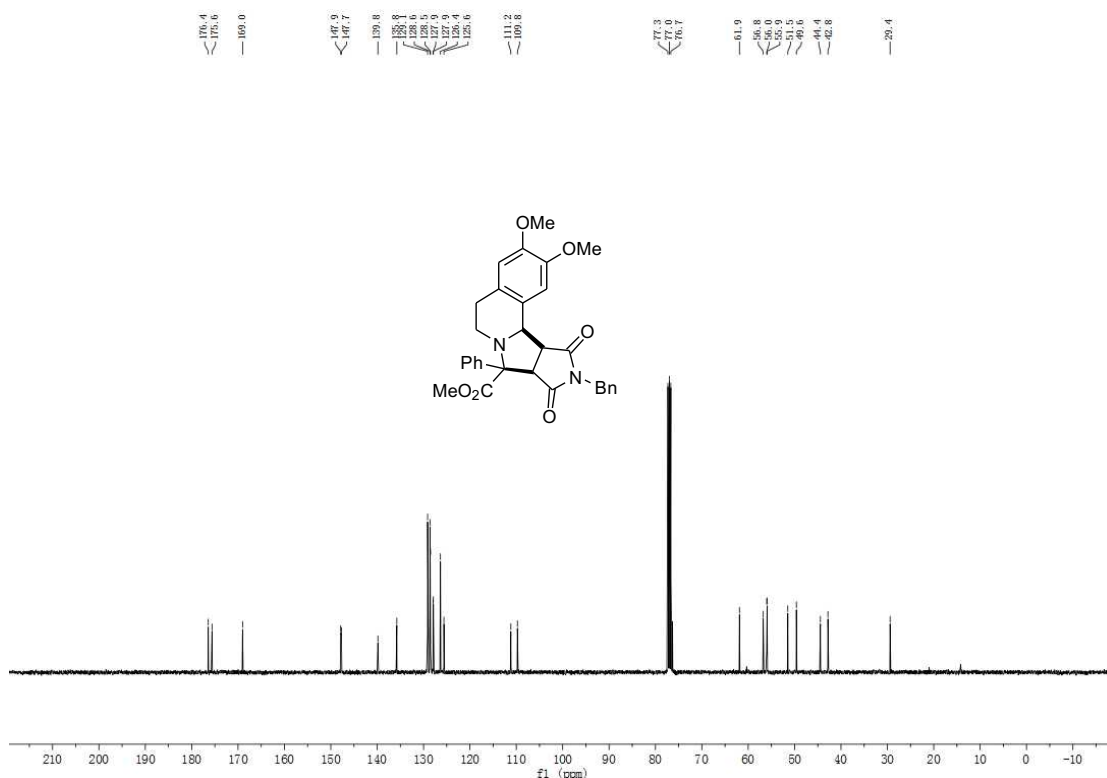

**Scheme 7B:**

**methyl 10-benzyl-2,3-dimethoxy-9,11-dioxo-8-phenyl-5,8,8a,9,10,11,11a,11b-octahydro-6H-pyrrolo[3',4':3,4]pyrrolo[2,1-a]isoquinoline-8-carboxylate (6la)**

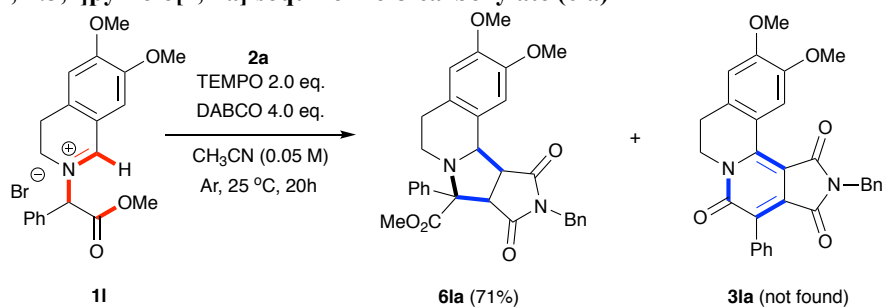

**General procedure:** 6,7-dimethoxy-2-(2-methoxy-2-oxo-1-phenylethyl)-3,4-dihydroisoquinolin-2-ium bromide **11** (0.45mmol, 189.1mg, 1.5equiv), 1-benzyl-1H-pyrrole-2,5-dione **2a** (0.3mmol, 56.2mg, 1.0equiv), 1,4-Diazabicyclo[2.2.2]octane (DABCO, 1.2mmol, 134.6mg, 4.0equiv), TEMPO (0.6mmol, 93.8mg, 2.0equiv) were added sequentially to 6.0mL of CH<sub>3</sub>CN. The mixture was stirred at 25°C for 20h under an argon atmosphere. Then solvent was removed by rotary evaporator, the residual crude products was purified by column chromatography (SiO<sub>2</sub>, PE/EA=5:1, v/v; R<sub>f</sub>=0.6) to afford compound **6la** (yellow oil, 111.7mg, yield=71%).

## 5. X-ray Information for 3aa

Crystals suitable of **3aa** for X-ray analysis could be successfully grown by slow volatilization in ethyl acetate.

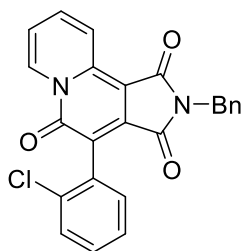

**3aa** CCDC:2282683

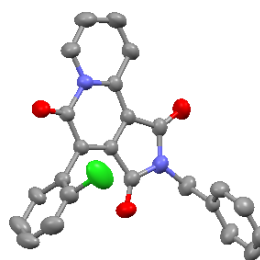

## checkCIF/PLATON report

Structure factors have been supplied for datablock(s) 1\_a

THIS REPORT IS FOR GUIDANCE ONLY. IF USED AS PART OF A REVIEW PROCEDURE FOR PUBLICATION, IT SHOULD NOT REPLACE THE EXPERTISE OF AN EXPERIENCED CRYSTALLOGRAPHIC REFEREE.

No syntax errors found. CIF dictionary Interpreting this report

### Datablock: 1

---

|                        |                                          |                    |
|------------------------|------------------------------------------|--------------------|
| Bond precision:        | C-C = 0.0035 A                           | Wavelength=0.71073 |
| Cell:                  | a=9.8715(15) b=10.2631(15) c=10.4758(15) |                    |
|                        | alpha=92.848(2) beta=100.885(2)          |                    |
|                        | gamma=108.048(2)                         |                    |
| Temperature:           | 296 K                                    |                    |
|                        | Calculated                               | Reported           |
| Volume                 | 984.3(3)                                 | 984.3(3)           |
| Space group            | P -1                                     | P -1               |
| Hall group             | -P 1                                     | -P 1               |
| Moiety formula         | C24 H15 Cl N2 O3                         | ?                  |
| Sum formula            | C24 H15 Cl N2 O3                         | C24 H15 Cl N2 O3   |
| Mr                     | 414.83                                   | 414.83             |
| Dx, g cm <sup>-3</sup> | 1.400                                    | 1.400              |
| Z                      | 2                                        | 2                  |
| Mu (mm <sup>-1</sup> ) | 0.224                                    | 0.224              |
| F000                   | 428.0                                    | 428.0              |
| F000'                  | 428.48                                   |                    |
| h, k, lmax             | 14, 15, 15                               | 13, 13, 15         |
| Nref                   | 6438                                     | 5127               |
| Tmin, Tmax             | 0.948, 0.956                             | 0.656, 0.746       |
| Tmin'                  | 0.935                                    |                    |
| Correction method= #   | Reported T Limits: Tmin=0.656 Tmax=0.746 |                    |
| AbsCorr =              | MULTI-SCAN                               |                    |
| Data completeness=     | 0.796                                    | Theta(max)= 31.324 |
| R(reflections)=        | 0.0603( 3475)                            |                    |
| wR2(reflections)=      |                                          |                    |
|                        | 0.1930( 5127)                            |                    |
| S =                    | 0.998                                    | Npar= 271          |

The following ALERTS were generated. Each ALERT has the format

**test-name\_ALERT\_alert-type\_alert-level.**

Click on the hyperlinks for more details of the test.

#### **Alert level C**

PLAT230\_ALERT\_2\_C Hirshfeld Test Diff for C4 --C5 . 6.0 s.u.

PLAT242\_ALERT\_2\_C Low 'MainMol' Ueq as Compared to Neighbors of C6 Check

PLAT906\_ALERT\_3\_C Large K Value in the Analysis of Variance ..... 3.890  
Check

PLAT911\_ALERT\_3\_C Missing FCF Refl Between Thmin & STh/L= 0.600 33 Report

PLAT992\_ALERT\_5\_C Repd & Actual \_reflns\_number\_gt Values Differ by 14 Check

#### **Alert level G**

PLAT154\_ALERT\_1\_G The s.u.'s on the Cell Angles are Equal ..(Note) 0.002  
Degree

PLAT432\_ALERT\_2\_G Short Inter X...Y Contact C11 ..C10 . 3.25 Ang.

1-x,1-y,1-z = 2\_666 Check

PLAT912\_ALERT\_4\_G Missing # of FCF Reflections Above STh/L= 0.600 1155 Note

PLAT941\_ALERT\_3\_G Average HKL Measurement Multiplicity ..... 1.3 Low

PLAT951\_ALERT\_5\_G Calculated (ThMax) and CIF-Reported Kmax Differ 2 Units

PLAT957\_ALERT\_1\_G Calculated (ThMax) and Actual (FCF) Kmax Differ 2 Units

PLAT965\_ALERT\_2\_G The SHELXL WEIGHT Optimisation has not Converged Please  
Check

PLAT978\_ALERT\_2\_G Number C-C Bonds with Positive Residual Density. 7 Info

0 **ALERT level A** = Most likely a serious problem - resolve or explain

0 **ALERT level B** = A potentially serious problem, consider carefully

5 **ALERT level C** = Check. Ensure it is not caused by an omission or oversight

8 **ALERT level G** = General information/check it is not something unexpected

2 ALERT type 1 CIF construction/syntax error, inconsistent or missing data

5 ALERT type 2 Indicator that the structure model may be wrong or deficient

3 ALERT type 3 Indicator that the structure quality may be low

1 ALERT type 4 Improvement, methodology, query or suggestion

2 ALERT type 5 Informative message, check

It is advisable to attempt to resolve as many as possible of the alerts in all categories. Often the minor alerts point to easily fixed oversights, errors and omissions in your CIF or refinement strategy, so attention to these fine details can be worthwhile. In order to resolve some of the more serious problems it may be necessary to carry out additional measurements or structure refinements. However, the purpose of your study may justify the reported deviations and the more serious of these should normally be commented upon in the discussion or experimental section of a paper or in the "special\_details" fields of the CIF. checkCIF was carefully designed to identify outliers and unusual parameters, but every test has its limitations and alerts that are not important in a particular case may appear. Conversely, the absence of alerts does not guarantee there are no aspects of the results needing attention. It is up to the individual to critically assess their own results and, if necessary, seek expert advice.

#### **Publication of your CIF in IUCr journals**

A basic structural check has been run on your CIF. These basic checks will be run on all CIFs submitted for publication in IUCr journals (*Acta Crystallographica*, *Journal of Applied Crystallography*, *Journal*

of Synchrotron Radiation); however, if you intend to submit to *Acta Crystallographica Section C* or *E* or *IUCrData*, you should make sure that full publication checks are run on the final version of your CIF prior to submission.

#### **Publication of your CIF in other journals**

Please refer to the *Notes for Authors* of the relevant journal for any special instructions relating to CIF submission.

**PLATON version of 06/07/2023; check.def file version of 30/06/2023**

#### **6. Reference**

- 1 Shi. -Z. Zhu, Chao. -Y. Qin, Yan. -L. Wang, Qian. -I. Chu, *Journal of Fluorine Chemistry*. 1999, **99(2)**, 183-187.
